# Supplementary material for: Impact of the 13-Valent Pneumococcal Conjugate Vaccine on Clinical and Hypoxemic Childhood Pneumonia over Three Years in Central Malawi: An Observational Study
Source: PubMed Central journal article supplement (PMC5215454; doi:10.1371/journal.pone.0168209), 2017-01-04

## Appendix 7: Time-Series Regression Results for each Health System Level

Table A7.1. Hospitals: Time-series regression results with the association of 76% three-dose PCV13 coverage on pneumonia outcomes highlighted

| Model and covariate <sup>a</sup> | All clinical pneumonia <sup>a</sup><br>IRR (95%CI);<br>p-value |
|----------------------------------|----------------------------------------------------------------|
| <i>3dose</i> (B <sub>1</sub> )   | 1.154 (0.608, 2.192);<br>p=0.661                               |
| <i>L1.dres</i> (B <sub>2</sub> ) | 1.022 (1.009, 1.035);<br>p=0.001                               |
| constant (B <sub>0</sub> )       | 441.9 (267.8, 729.1);<br>p<0.0001                              |

  

| Model and covariate <sup>a</sup> | Fast breathing pneumonia <sup>a</sup><br>IRR (95%CI);<br>p-value | Chest indrawing pneumonia <sup>a</sup><br>IRR (95%CI);<br>p-value | Danger sign pneumonia <sup>a</sup><br>IRR (95%CI);<br>p-value | Hypoxemic pneumonia <sup>a</sup><br>IRR (95%CI);<br>p-value | Mortality <sup>a</sup><br>IRR (95%CI);<br>p-value | Proportion danger sign <sup>a</sup><br>OR (95%CI);<br>p-value |
|----------------------------------|------------------------------------------------------------------|-------------------------------------------------------------------|---------------------------------------------------------------|-------------------------------------------------------------|---------------------------------------------------|---------------------------------------------------------------|
| <i>3dose</i> (B <sub>1</sub> )   | 2.833 (1.387, 5.785);<br>p=0.004                                 | 1.504 (0.759, 2.978);<br>p=0.242                                  | 0.611 (0.294, 1.269);<br>p=0.186                              | 0.641 (0.347, 1.186);<br>p=0.156                            | 0.640 (0.412, 0.993);<br>p=0.046                  | 0.360 (0.256, 0.505);<br>p<0.0001                             |
| <i>L1.dres</i> (B <sub>2</sub> ) | 1.084 (1.015, 1.157);<br>p=0.016                                 | 1.027 (1.009, 1.046);<br>p=0.004                                  | 1.045 (1.027, 1.062);<br>p<0.0001                             | 1.074 (1.034, 1.117);<br>p<0.0001                           | 1.020 (0.924, 1.127);<br>p=0.692                  | 1.090 (1.072, 1.109);<br>p<0.0001                             |
| constant (B <sub>0</sub> )       | 14.71 (8.16, 26.53);<br>p<0.0001                                 | 214.7 (124.7, 369.6);<br>p<0.0001                                 | 231.8 (135.1, 397.7);<br>p<0.0001                             | 67.39 (42.64, 106.51);<br>p<0.0001                          | 21.42 (15.41, 29.77);<br>p<0.0001                 | 1.061 (0.822, 1.369);<br>p=0.651                              |

IRR = Incidence Rate Ratio      OR = Odds Ratio

<sup>a</sup> Observations = 29; these are the 30 calendar months in time (January 2012 to June 2014) minus one due to the inclusion of the one-month lagged residual term *L1.dres*

Table A7.2. Health Centres: Time-series regression results with the association of 76% three-dose PCV13 coverage on pneumonia outcomes highlighted

| Model and covariate <sup>a</sup> | All clinical pneumonia <sup>a</sup><br>IRR (95%CI);<br>p-value |
|----------------------------------|----------------------------------------------------------------|
| <i>3dose</i> (B <sub>1</sub> )   | 1.366 (0.667, 2.799);<br>p=0.394                               |
| <i>L1.dres</i> (B <sub>2</sub> ) | 1.005 (0.977, 1.034);<br>p=0.727                               |
| constant (B <sub>0</sub> )       | 172.7 (98.0, 304.3);<br>p<0.0001                               |

  

| Model and covariate <sup>a</sup> | Fast breathing pneumonia <sup>a</sup><br>IRR (95%CI);<br>p-value | Chest indrawing pneumonia <sup>a</sup><br>IRR (95%CI);<br>p-value | Danger sign pneumonia <sup>a</sup><br>IRR (95%CI);<br>p-value | Hypoxemic pneumonia <sup>a</sup><br>IRR (95%CI);<br>p-value | Proportion danger sign <sup>a</sup><br>OR (95%CI);<br>p-value |
|----------------------------------|------------------------------------------------------------------|-------------------------------------------------------------------|---------------------------------------------------------------|-------------------------------------------------------------|---------------------------------------------------------------|
| <i>3dose</i> (B <sub>1</sub> )   | 1.664 (0.706, 3.921);<br>p=0.244                                 | 0.781 (0.409, 1.491);<br>p=0.453                                  | 0.840 (0.376, 1.874);<br>p=0.670                              | 0.360 (0.160, 0.811);<br>p=0.014                            | 0.671 (0.363, 1.242);<br>p=0.204                              |
| <i>L1.dres</i> (B <sub>2</sub> ) | 1.009 (0.977, 1.042);<br>p=0.598                                 | 1.044 (0.982, 1.109);<br>p=0.172                                  | 1.085 (1.002, 1.175);<br>p=0.045                              | 1.020 (0.928, 1.121);<br>p=0.681                            | 1.133 (1.052, 1.220);<br>p=0.001                              |
| constant (B <sub>0</sub> )       | 111.3 (56.1, 220.9);<br>p<0.0001                                 | 43.65 (26.67, 71.44);<br>p<0.0001                                 | 20.33 (11.02, 37.52);<br>p<0.0001                             | 41.50 (23.29, 73.94);<br>p<0.0001                           | 0.121 (0.075, 0.195);<br>p<0.0001                             |

IRR = Incidence Rate Ratio    OR = Odds Ratio

<sup>a</sup> Observations = 29; these are the 30 calendar months in time (January 2012 to June 2014) minus one due to the inclusion of the one-month lagged residual term *L1.dres*

Table A7.3. Community Health Worker clinics: Time-series regression results with the association of 76% three-dose PCV13 coverage on pneumonia outcomes highlighted

| Model and covariate <sup>a</sup> | All clinical pneumonia <sup>a</sup><br>IRR (95%CI);<br>p-value |
|----------------------------------|----------------------------------------------------------------|
| <i>3dose</i> (B <sub>1</sub> )   | 2.991 (1.676, 5.337);<br>p<0.0001                              |
| <i>L1.dres</i> (B <sub>2</sub> ) | 1.034 (1.011, 1.057);<br>p=0.004                               |
| constant (B <sub>0</sub> )       | 97.75 (60.77, 157.2);<br>p<0.0001                              |

  

| Model and covariate <sup>a</sup> | Fast breathing pneumonia <sup>a</sup><br>IRR (95%CI);<br>p-value | Chest indrawing pneumonia <sup>a</sup><br>IRR (95%CI);<br>p-value | Danger sign pneumonia <sup>a</sup><br>IRR (95%CI);<br>p-value | Hypoxemic pneumonia <sup>a</sup><br>IRR (95%CI);<br>p-value | Proportion danger sign <sup>a</sup><br>OR (95%CI);<br>p-value |
|----------------------------------|------------------------------------------------------------------|-------------------------------------------------------------------|---------------------------------------------------------------|-------------------------------------------------------------|---------------------------------------------------------------|
| <i>3dose</i> (B <sub>1</sub> )   | 2.969 (1.656, 5.324);<br>p<0.0001                                | 2.849 (0.747, 10.86);<br>p=0.125                                  | 931.6 (6.844, 126788.2);<br>p=0.006                           | 0.437 (0.138, 1.381);<br>p=0.158                            | 769.7 (0.866, 683687.2);<br>p=0.055                           |
| <i>L1.dres</i> (B <sub>2</sub> ) | 1.033 (1.010, 1.057);<br>p=0.004                                 | 1.164 (0.929, 1.459);<br>p=0.187                                  | 1.332 (0.915, 1.938);<br>p=0.134                              | 0.995 (0.801, 1.238);<br>p=0.967                            | 1.309 (0.893, 1.920);<br>p=0.167                              |
| constant (B <sub>0</sub> )       | 97.09 (60.13, 156.8);<br>p<0.0001                                | 1.043 (0.350, 3.112);<br>p=0.940                                  | 0.0018 (0.00002, 0.157);<br>p=0.006                           | 4.657 (2.012, 10.782);<br>p<0.0001                          | 8.0e-6 (1.7e-8, 0.004);<br>p<0.0001                           |

IRR = Incidence Rate Ratio    OR = Odds Ratio

<sup>a</sup> Observations = 29; these are the 30 calendar months in time (January 2012 to June 2014) minus one due to the inclusion of the one-month lagged residual term *L1.dres*

Figure A7.1 Sensitivity Analysis for All clinical pneumonia models - Hospitals

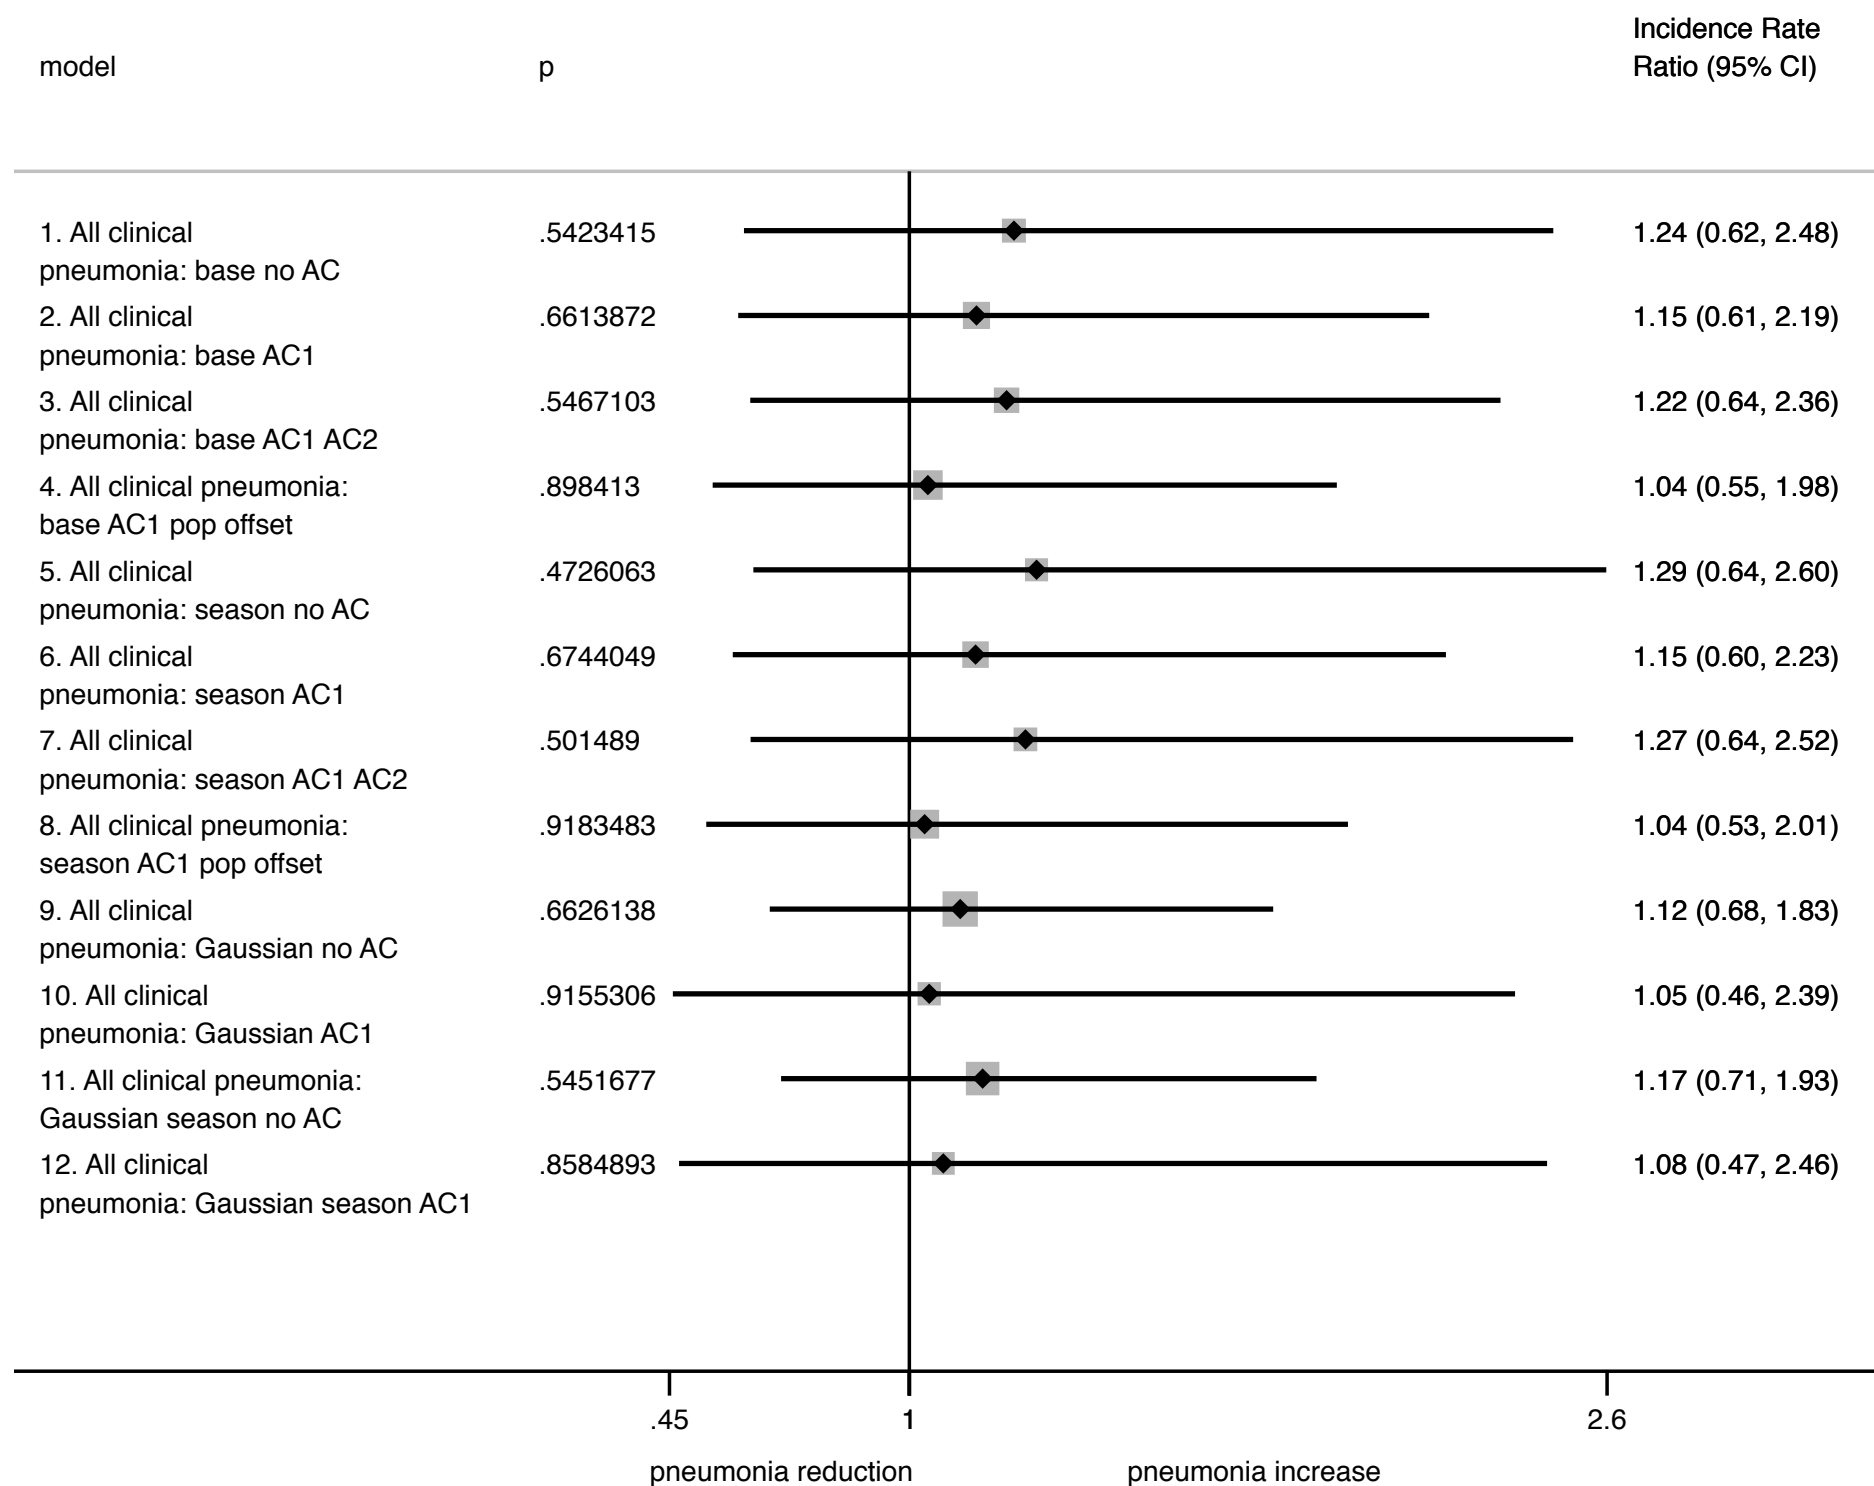

Figure A7.2 Sensitivity Analysis for Fast breathing pneumonia models - Hospitals

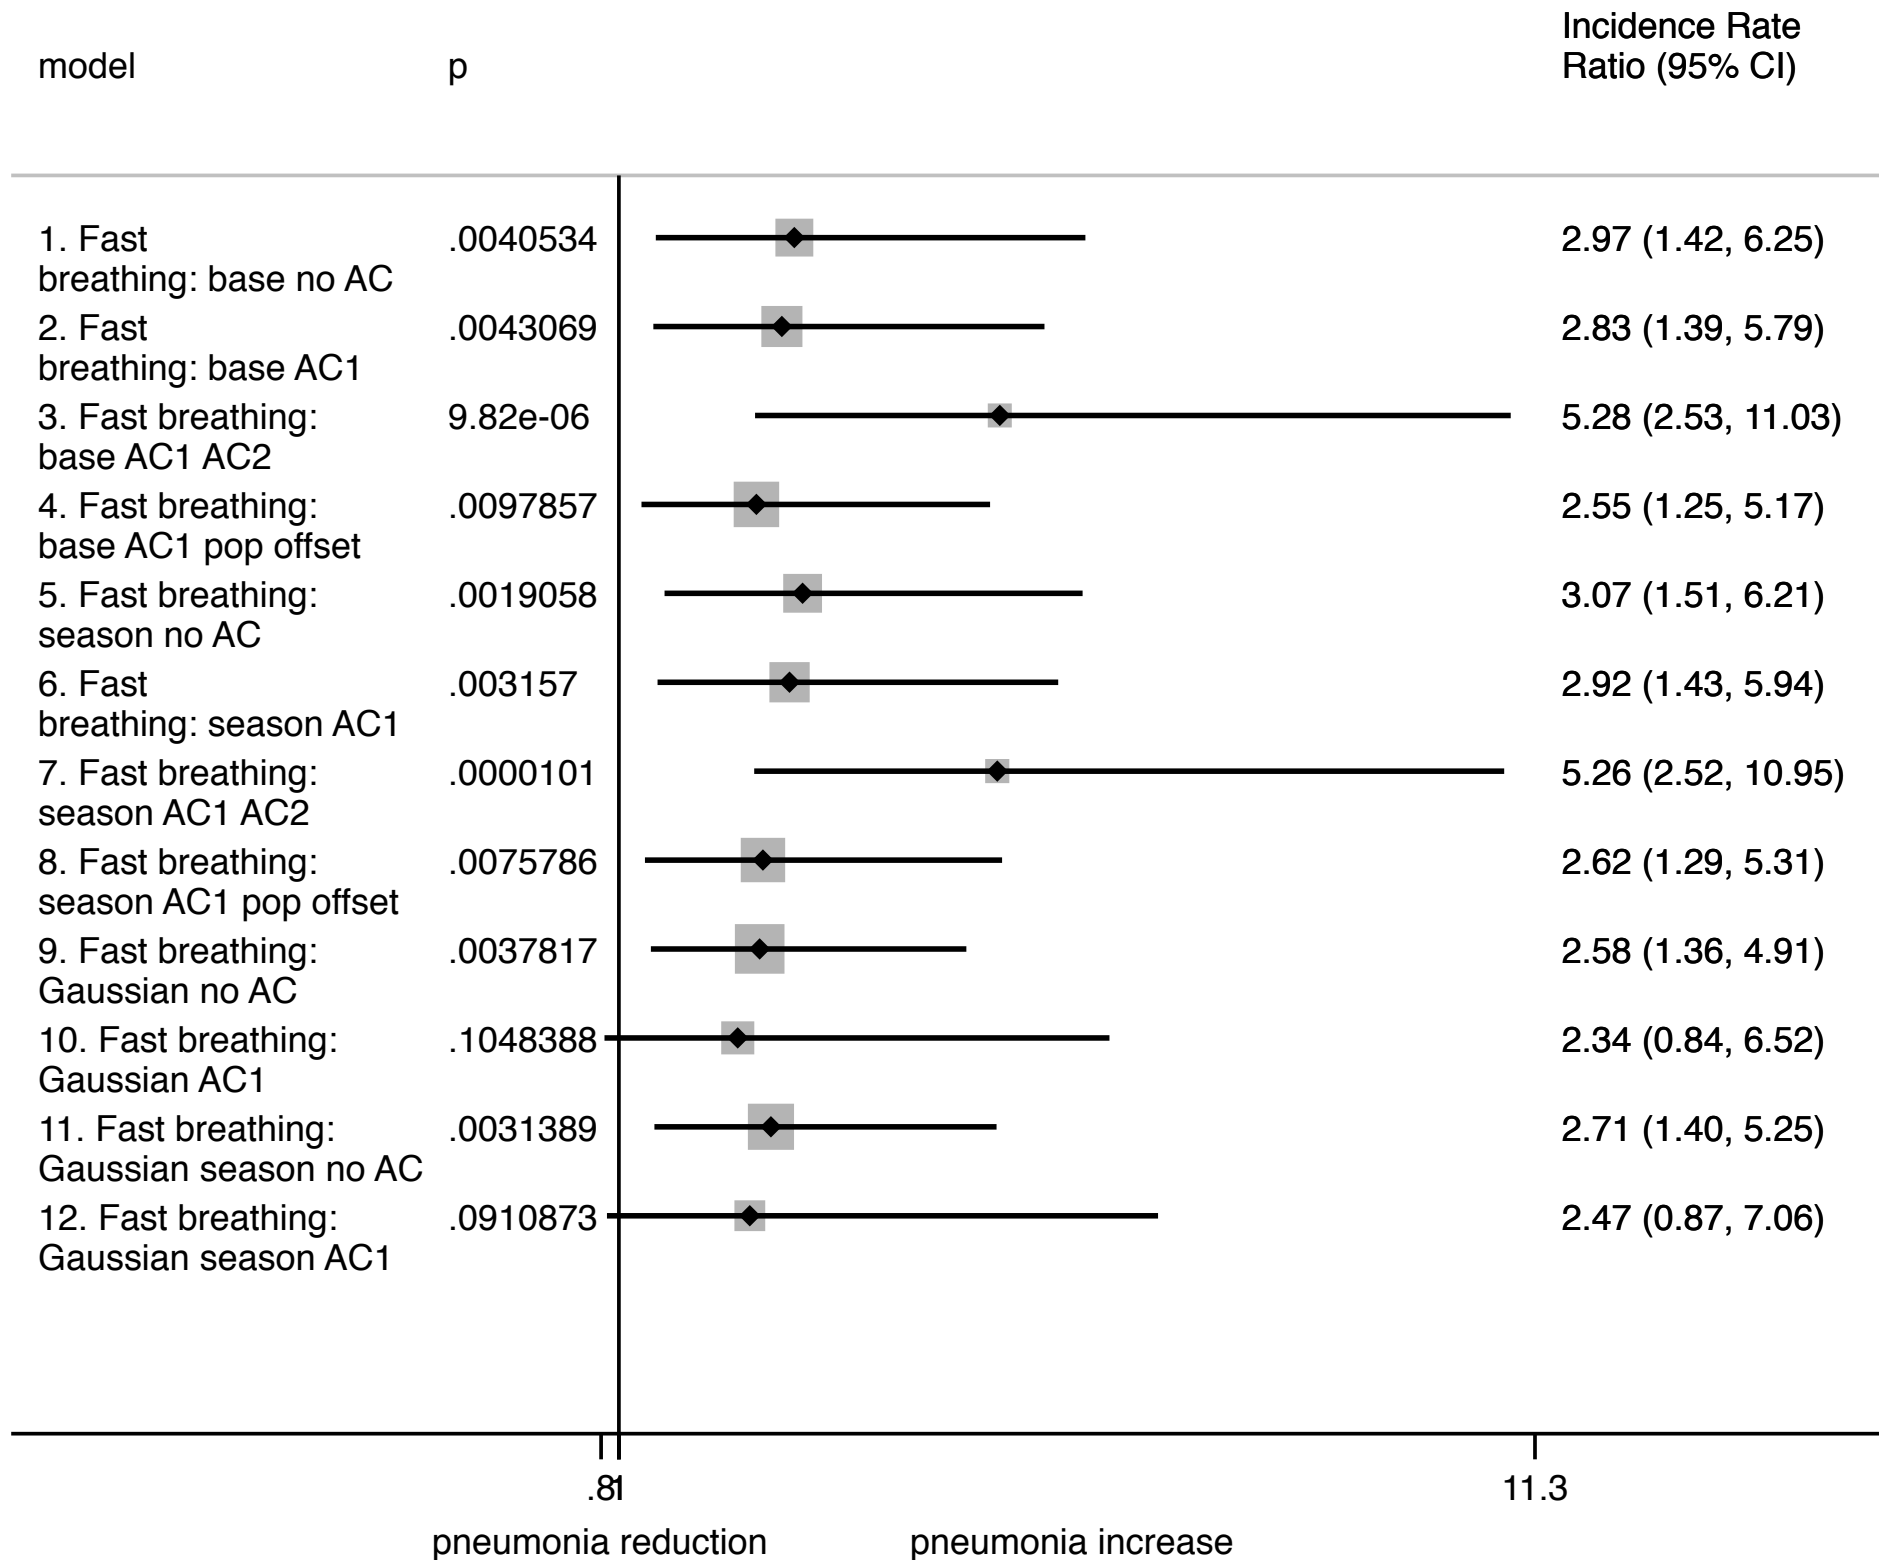

Figure A7.3 Sensitivity Analysis for Chest indrawing pneumonia models - Hospitals

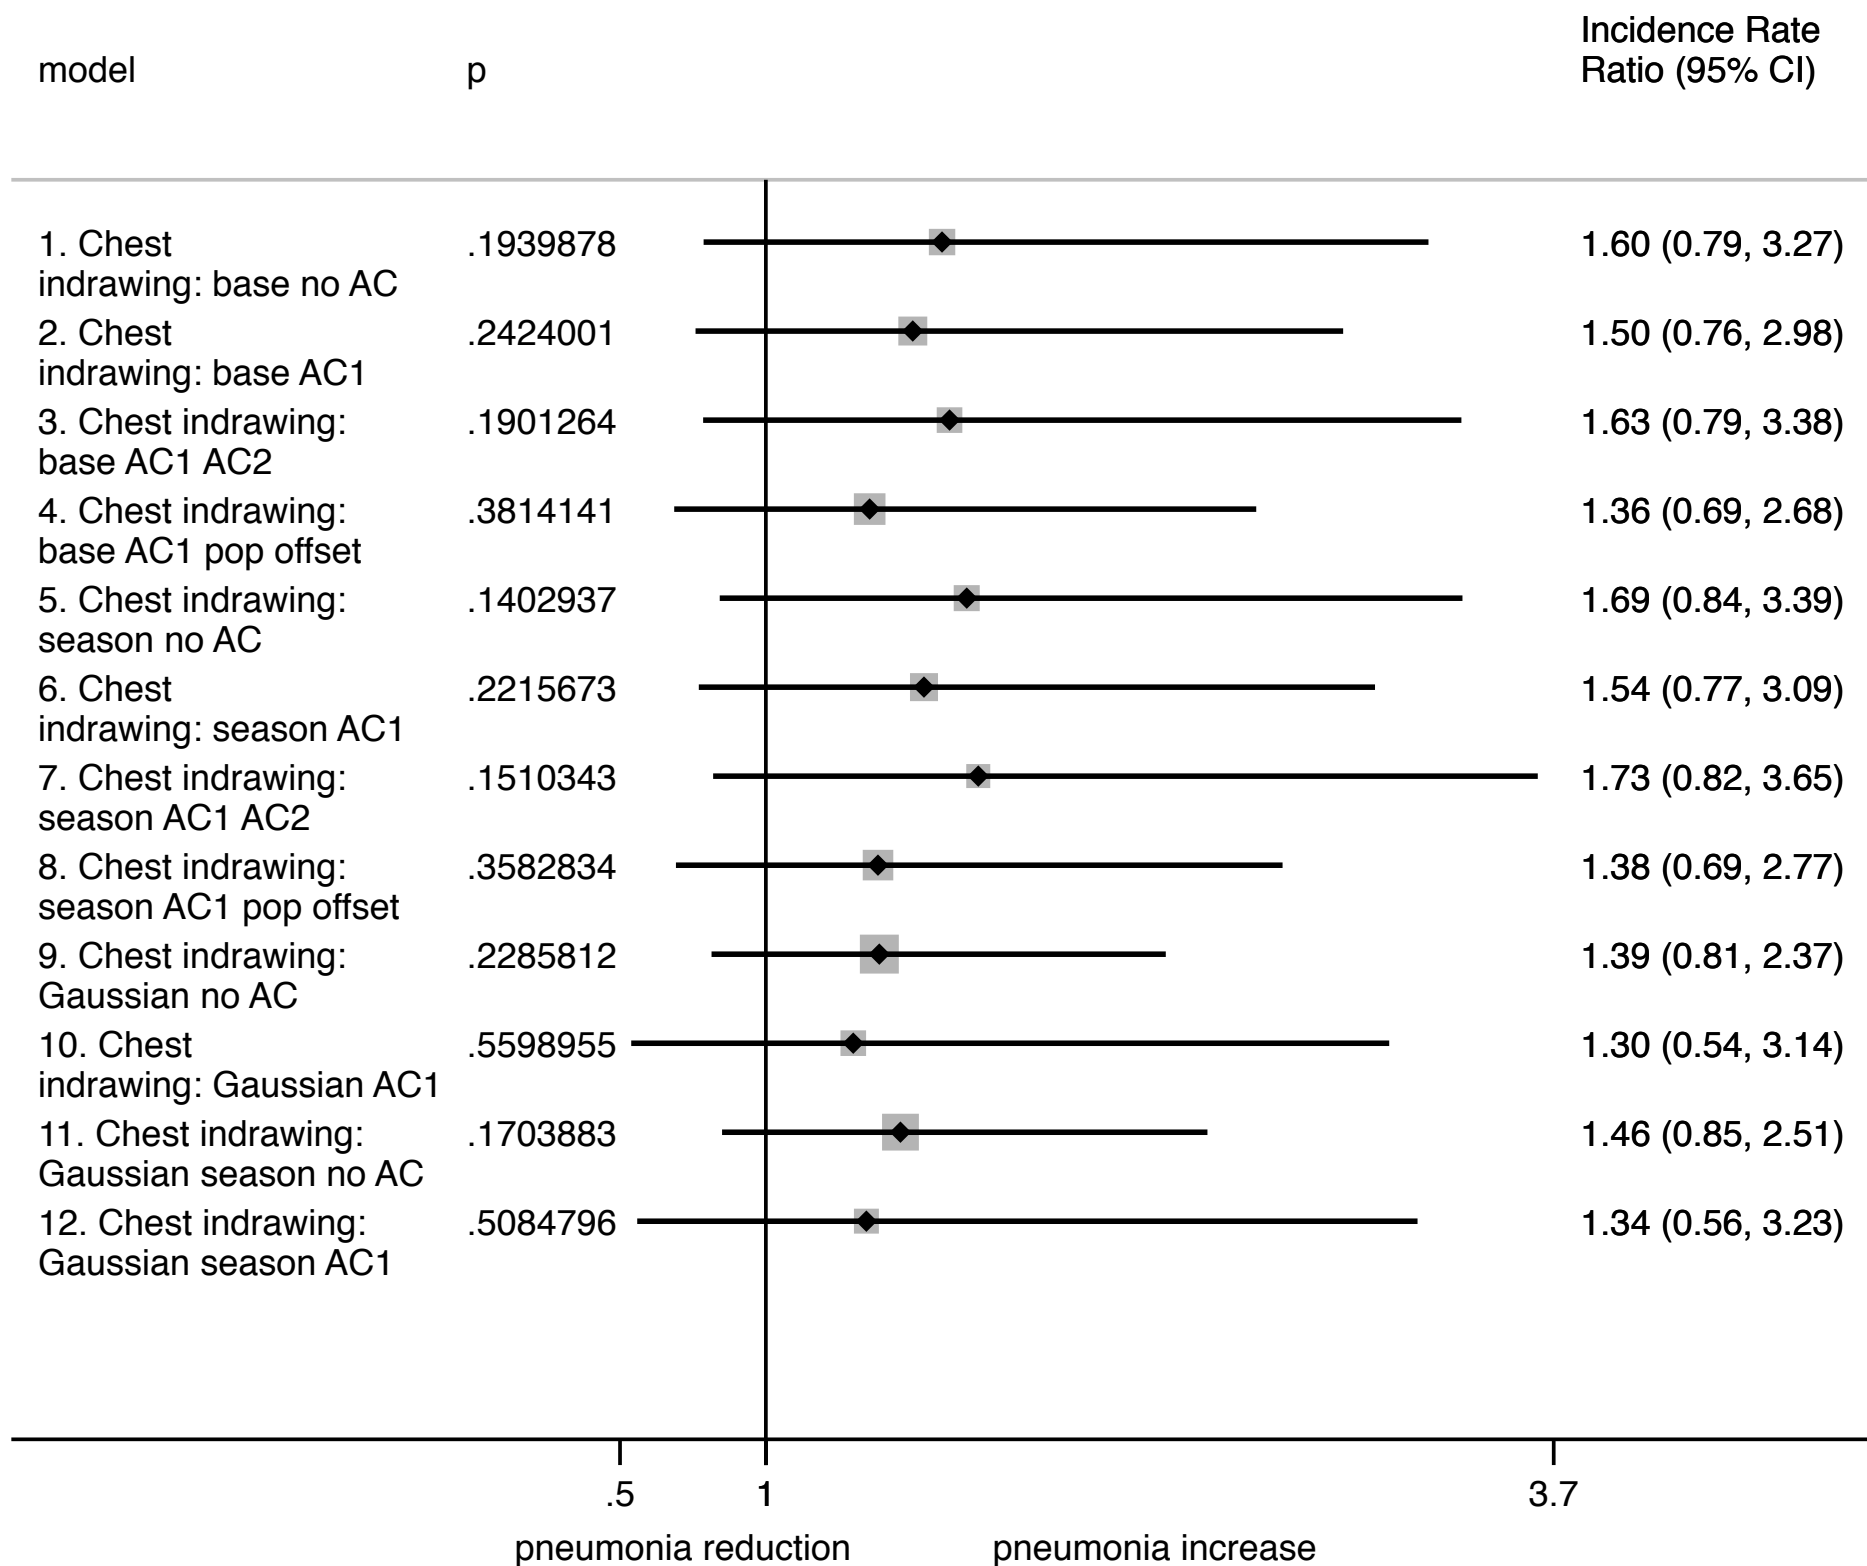

Figure A7.4 Sensitivity Analysis for Danger sign(s) pneumonia models - Hospitals

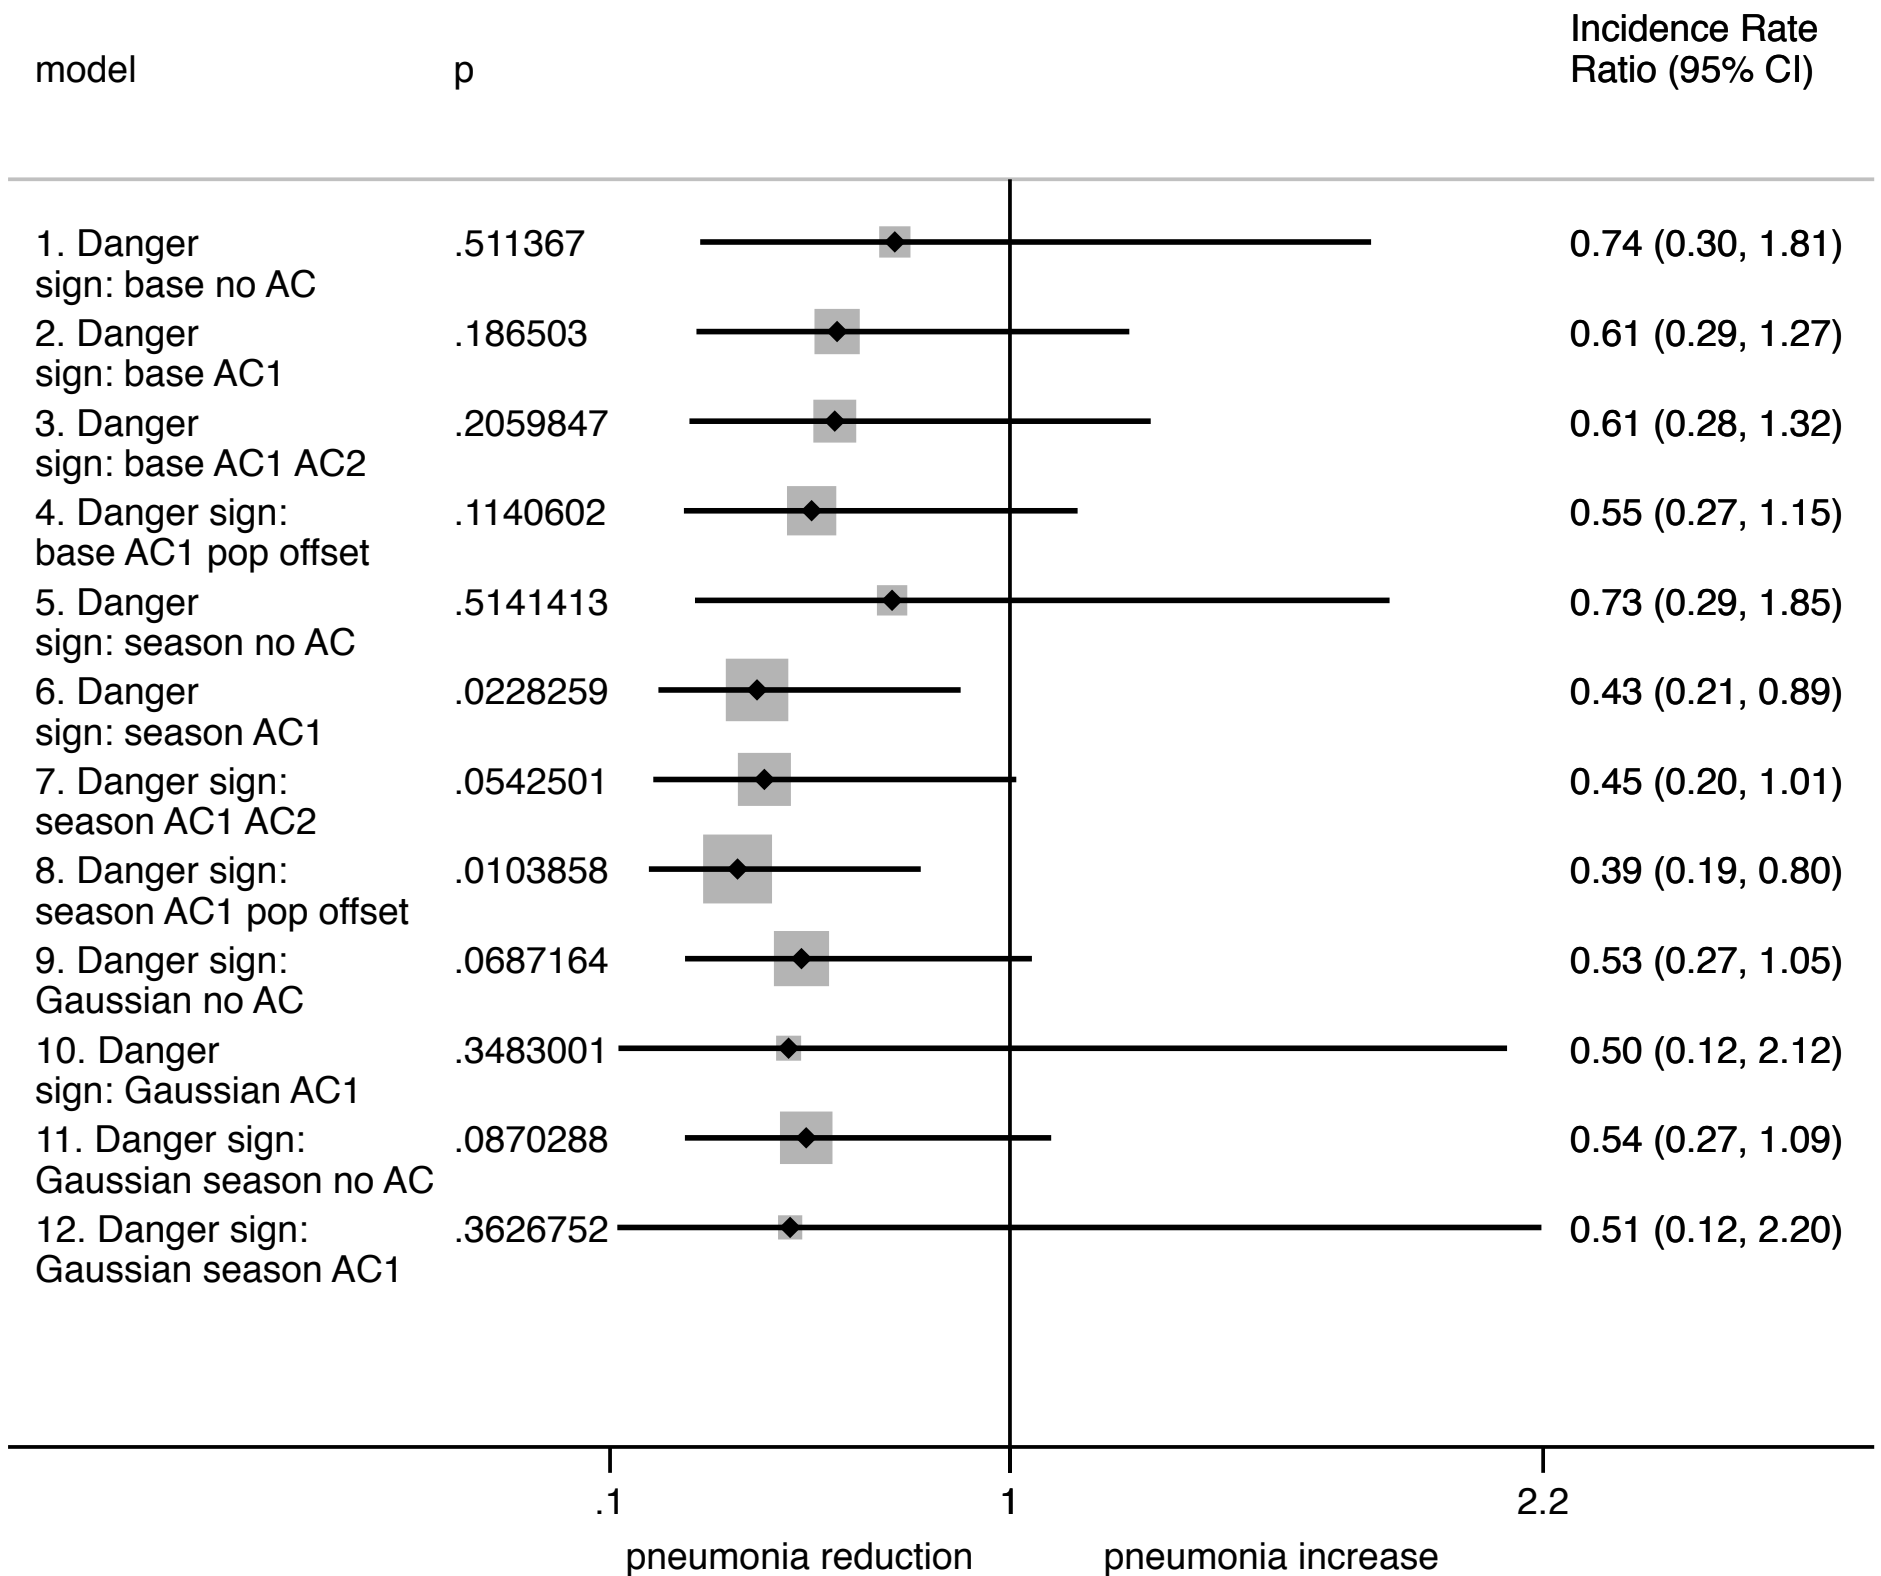

Figure A7.5

# Sensitivity Analysis for Hypoxemic pneumonia models - Hospitals

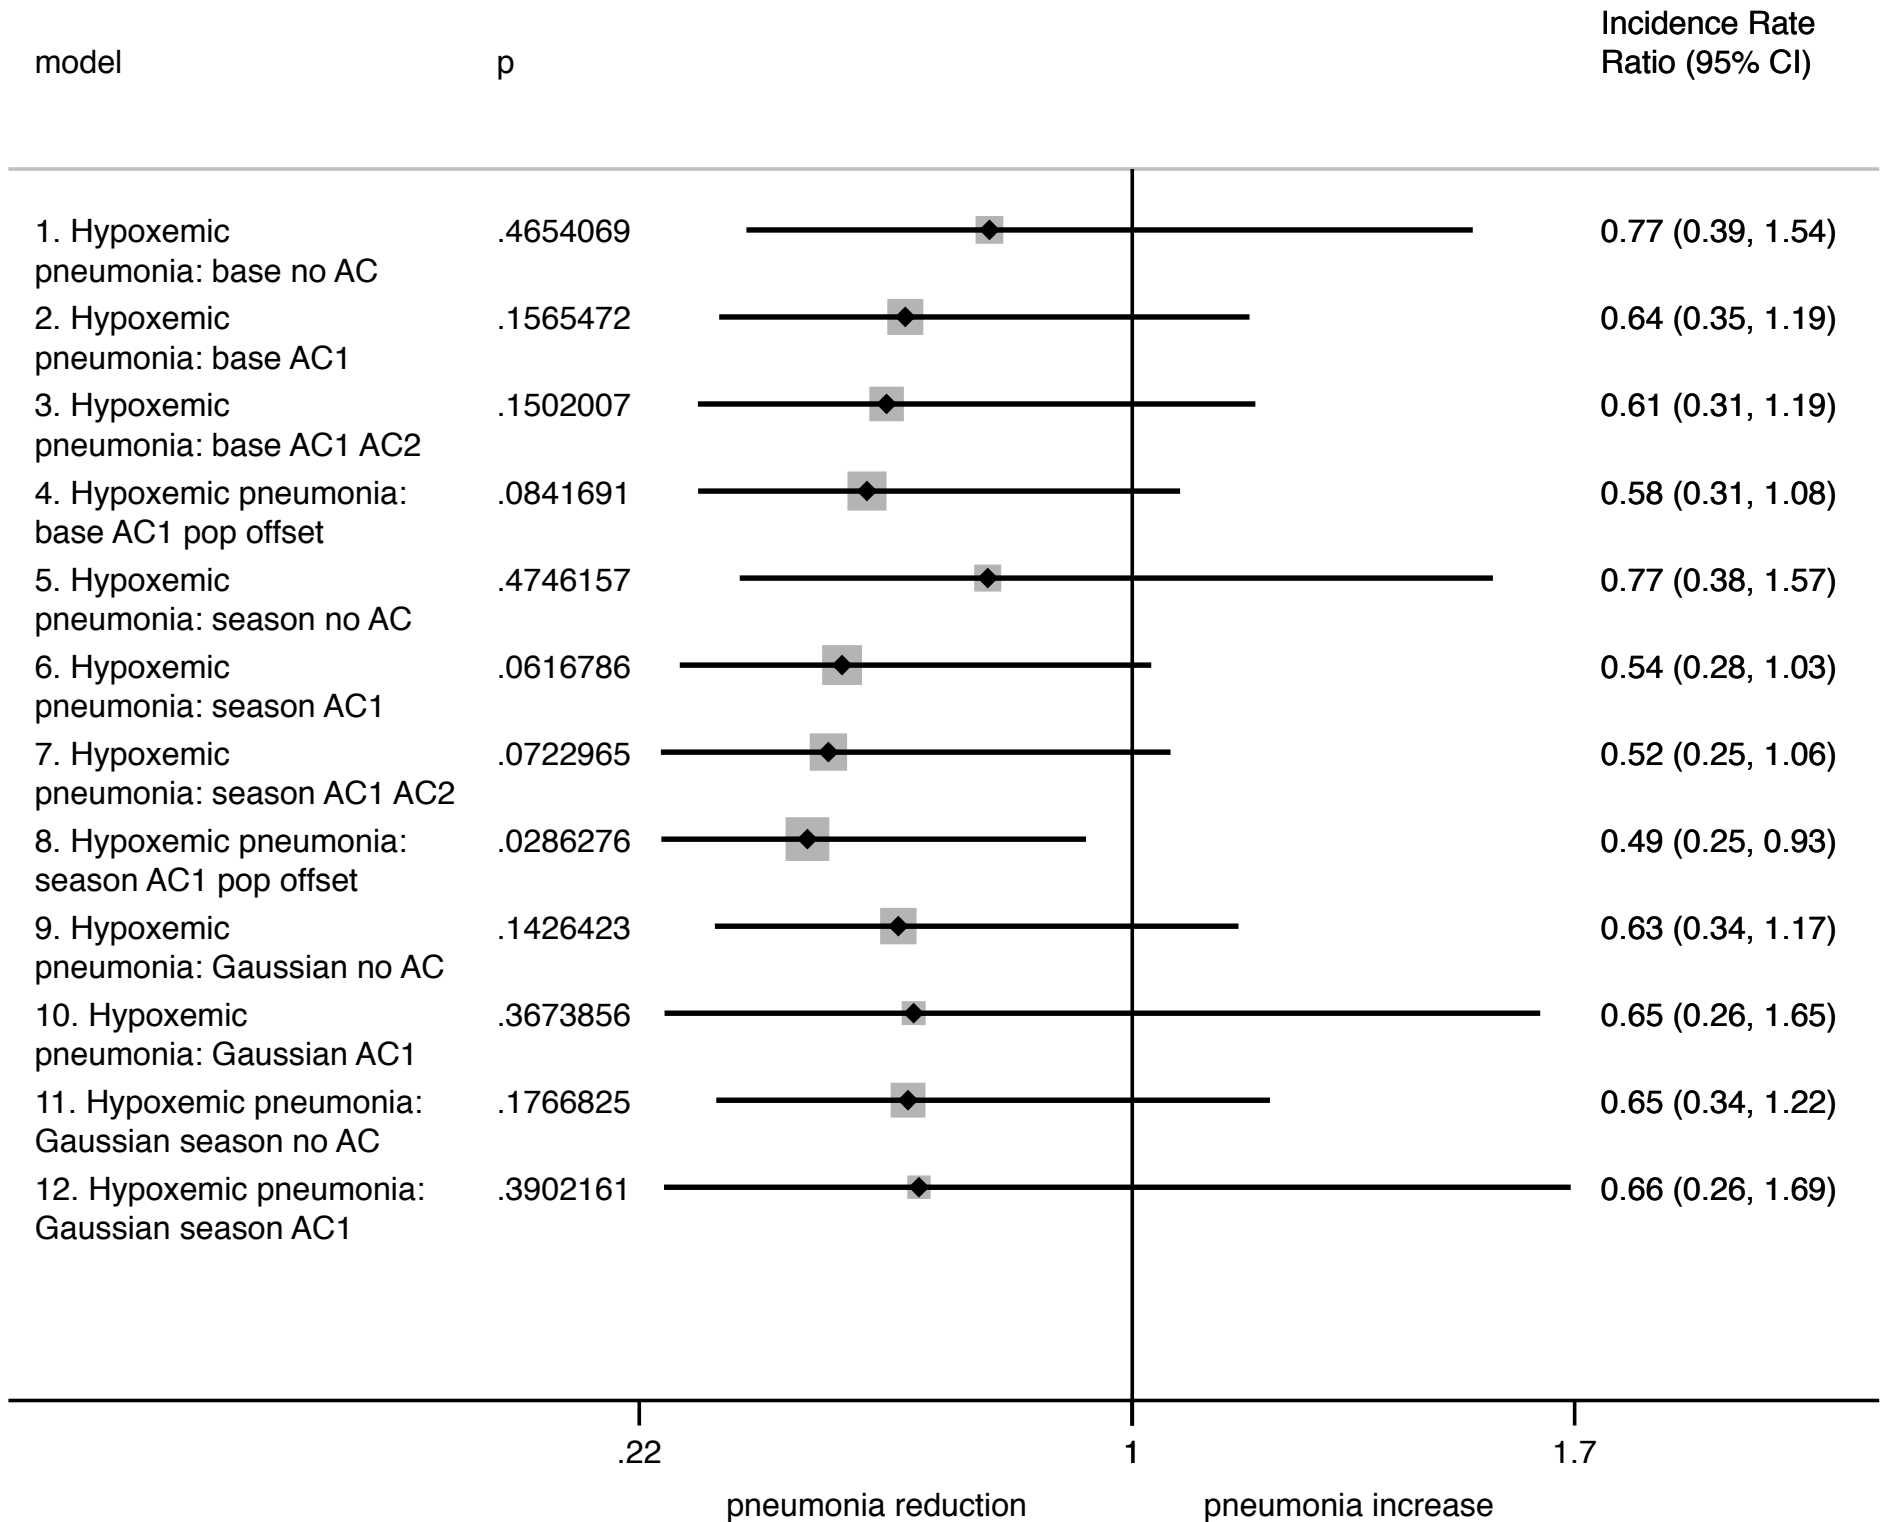



Figure A7.6

# Sensitivity Analysis for Died pneumonia models - Hospitals

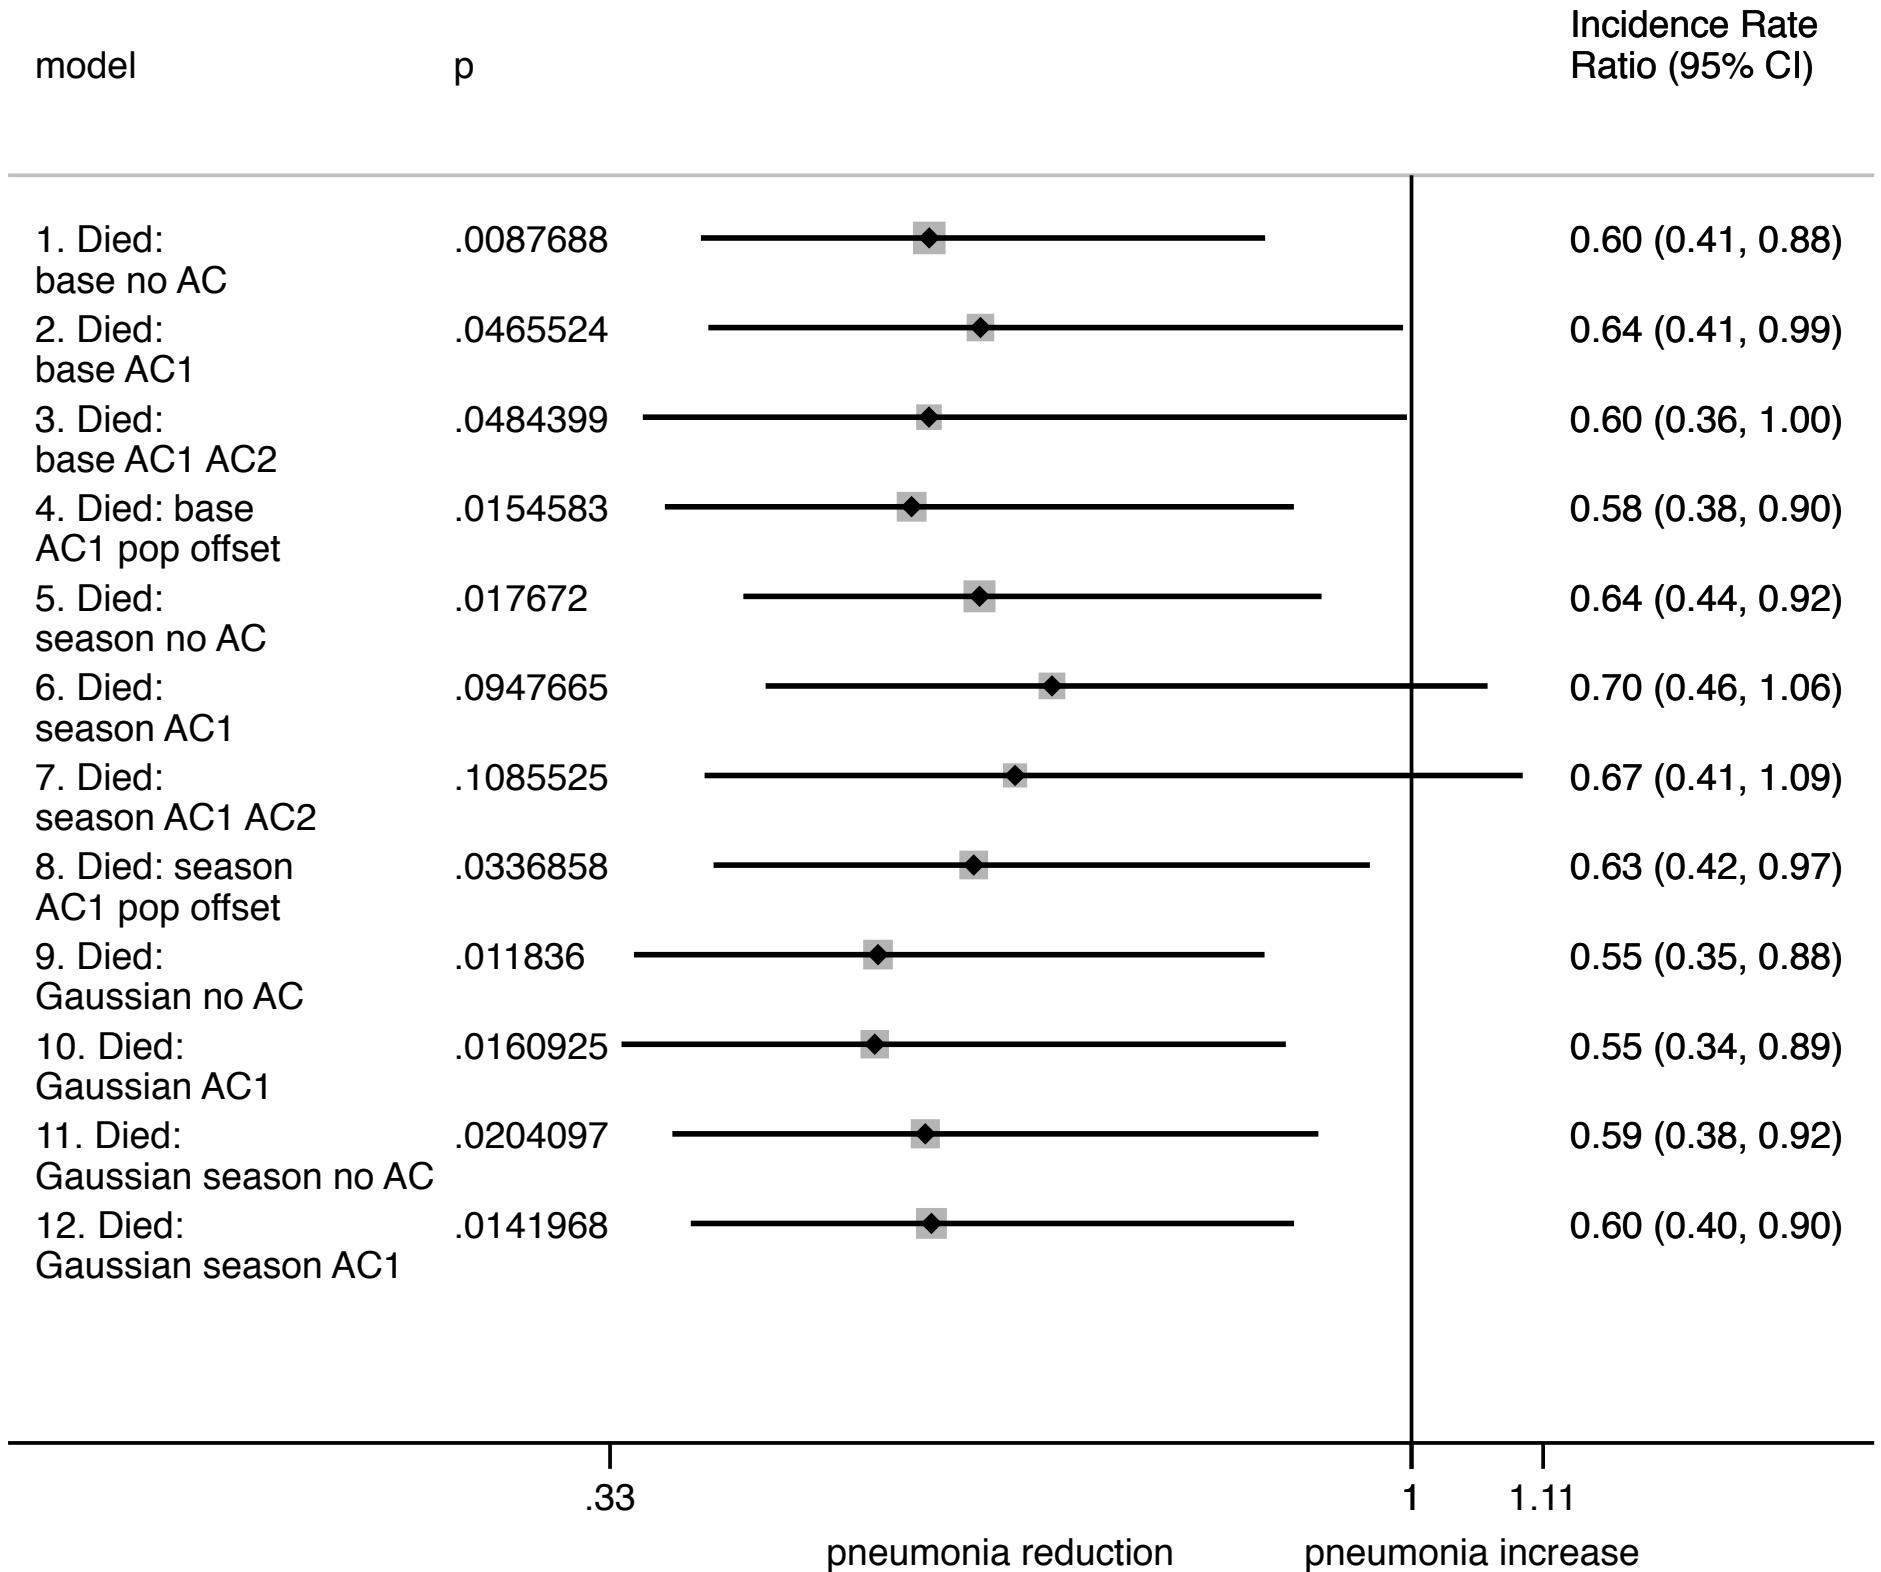

Figure A7.7

# Sensitivity Analysis for proportion danger sign pneumonia models - Hospitals

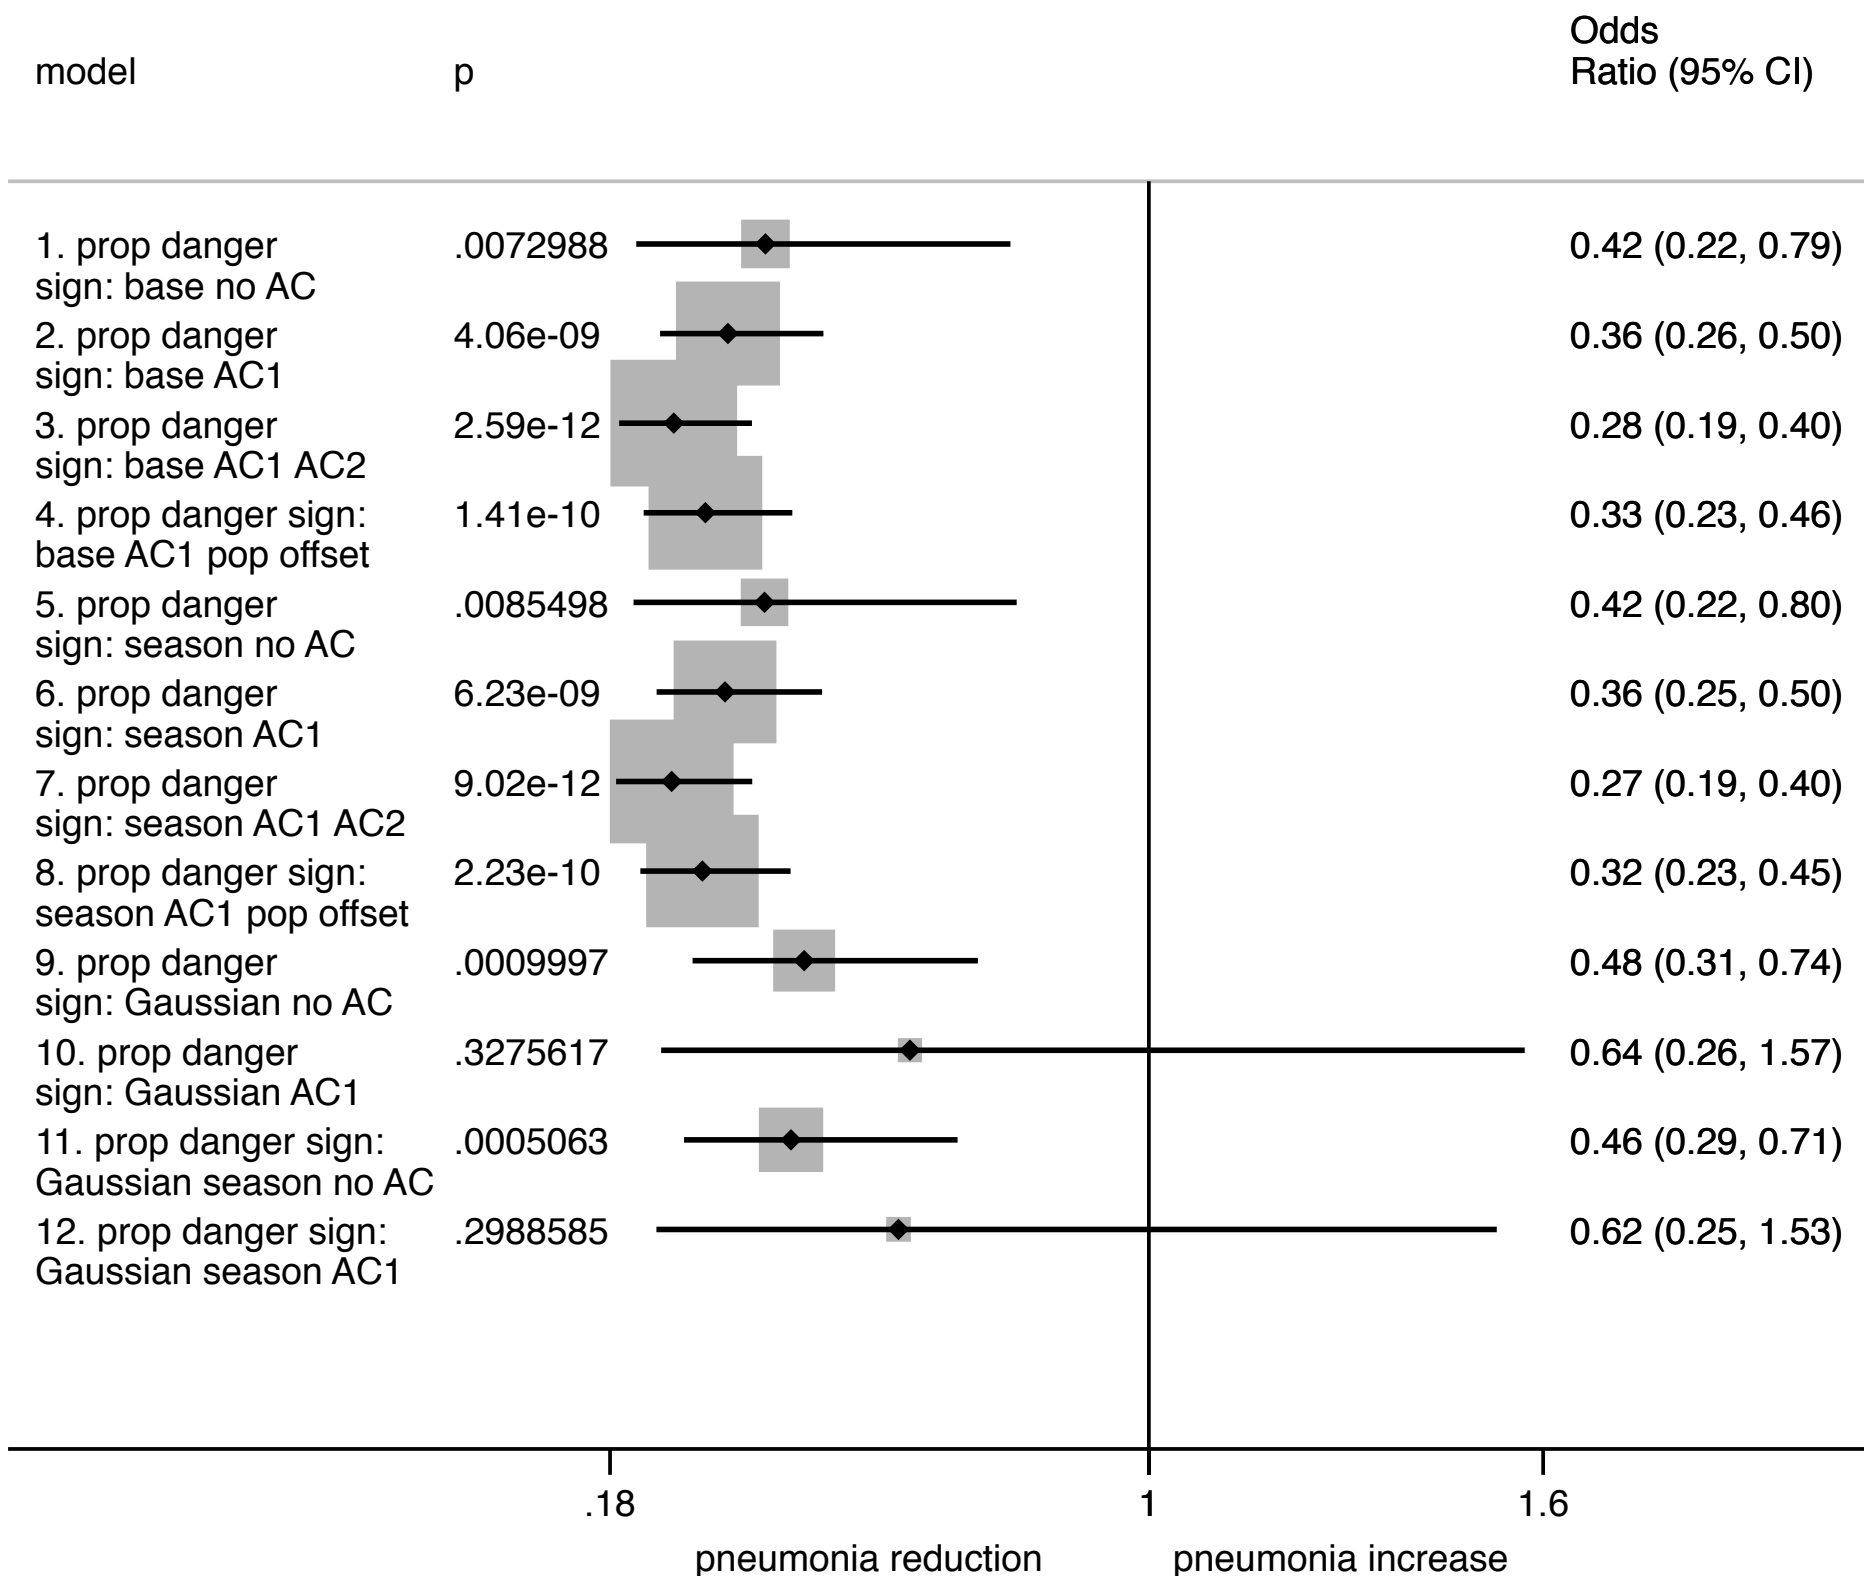

Figure A7.8 Sensitivity Analysis for All Clinical pneumonia models - Health Centres

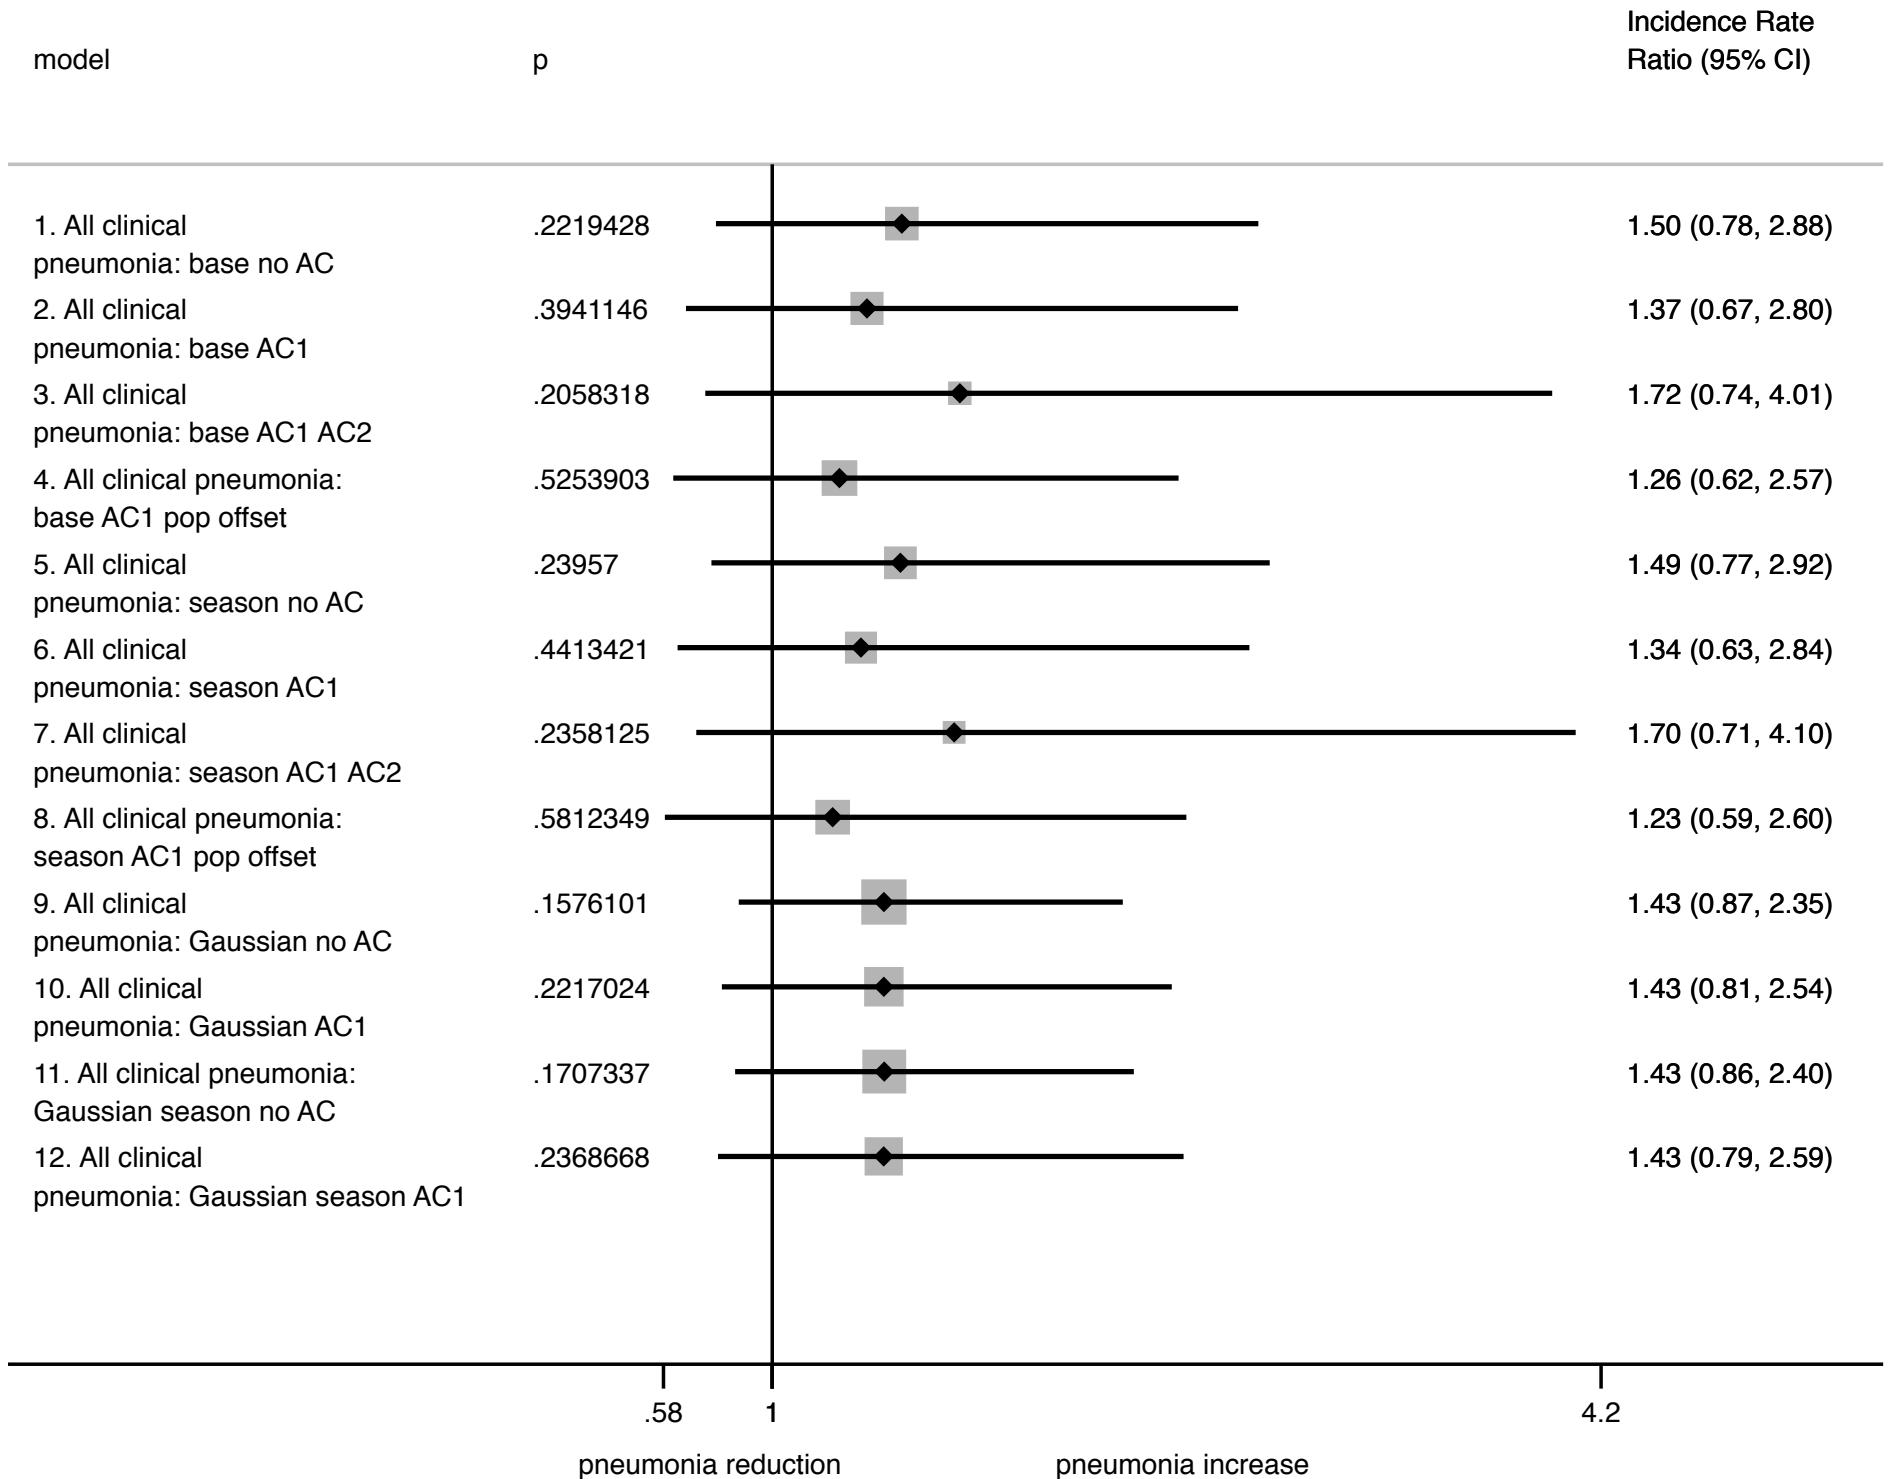

Figure A7.9 Sensitivity Analysis for Fast breathing pneumonia models - Health Centres

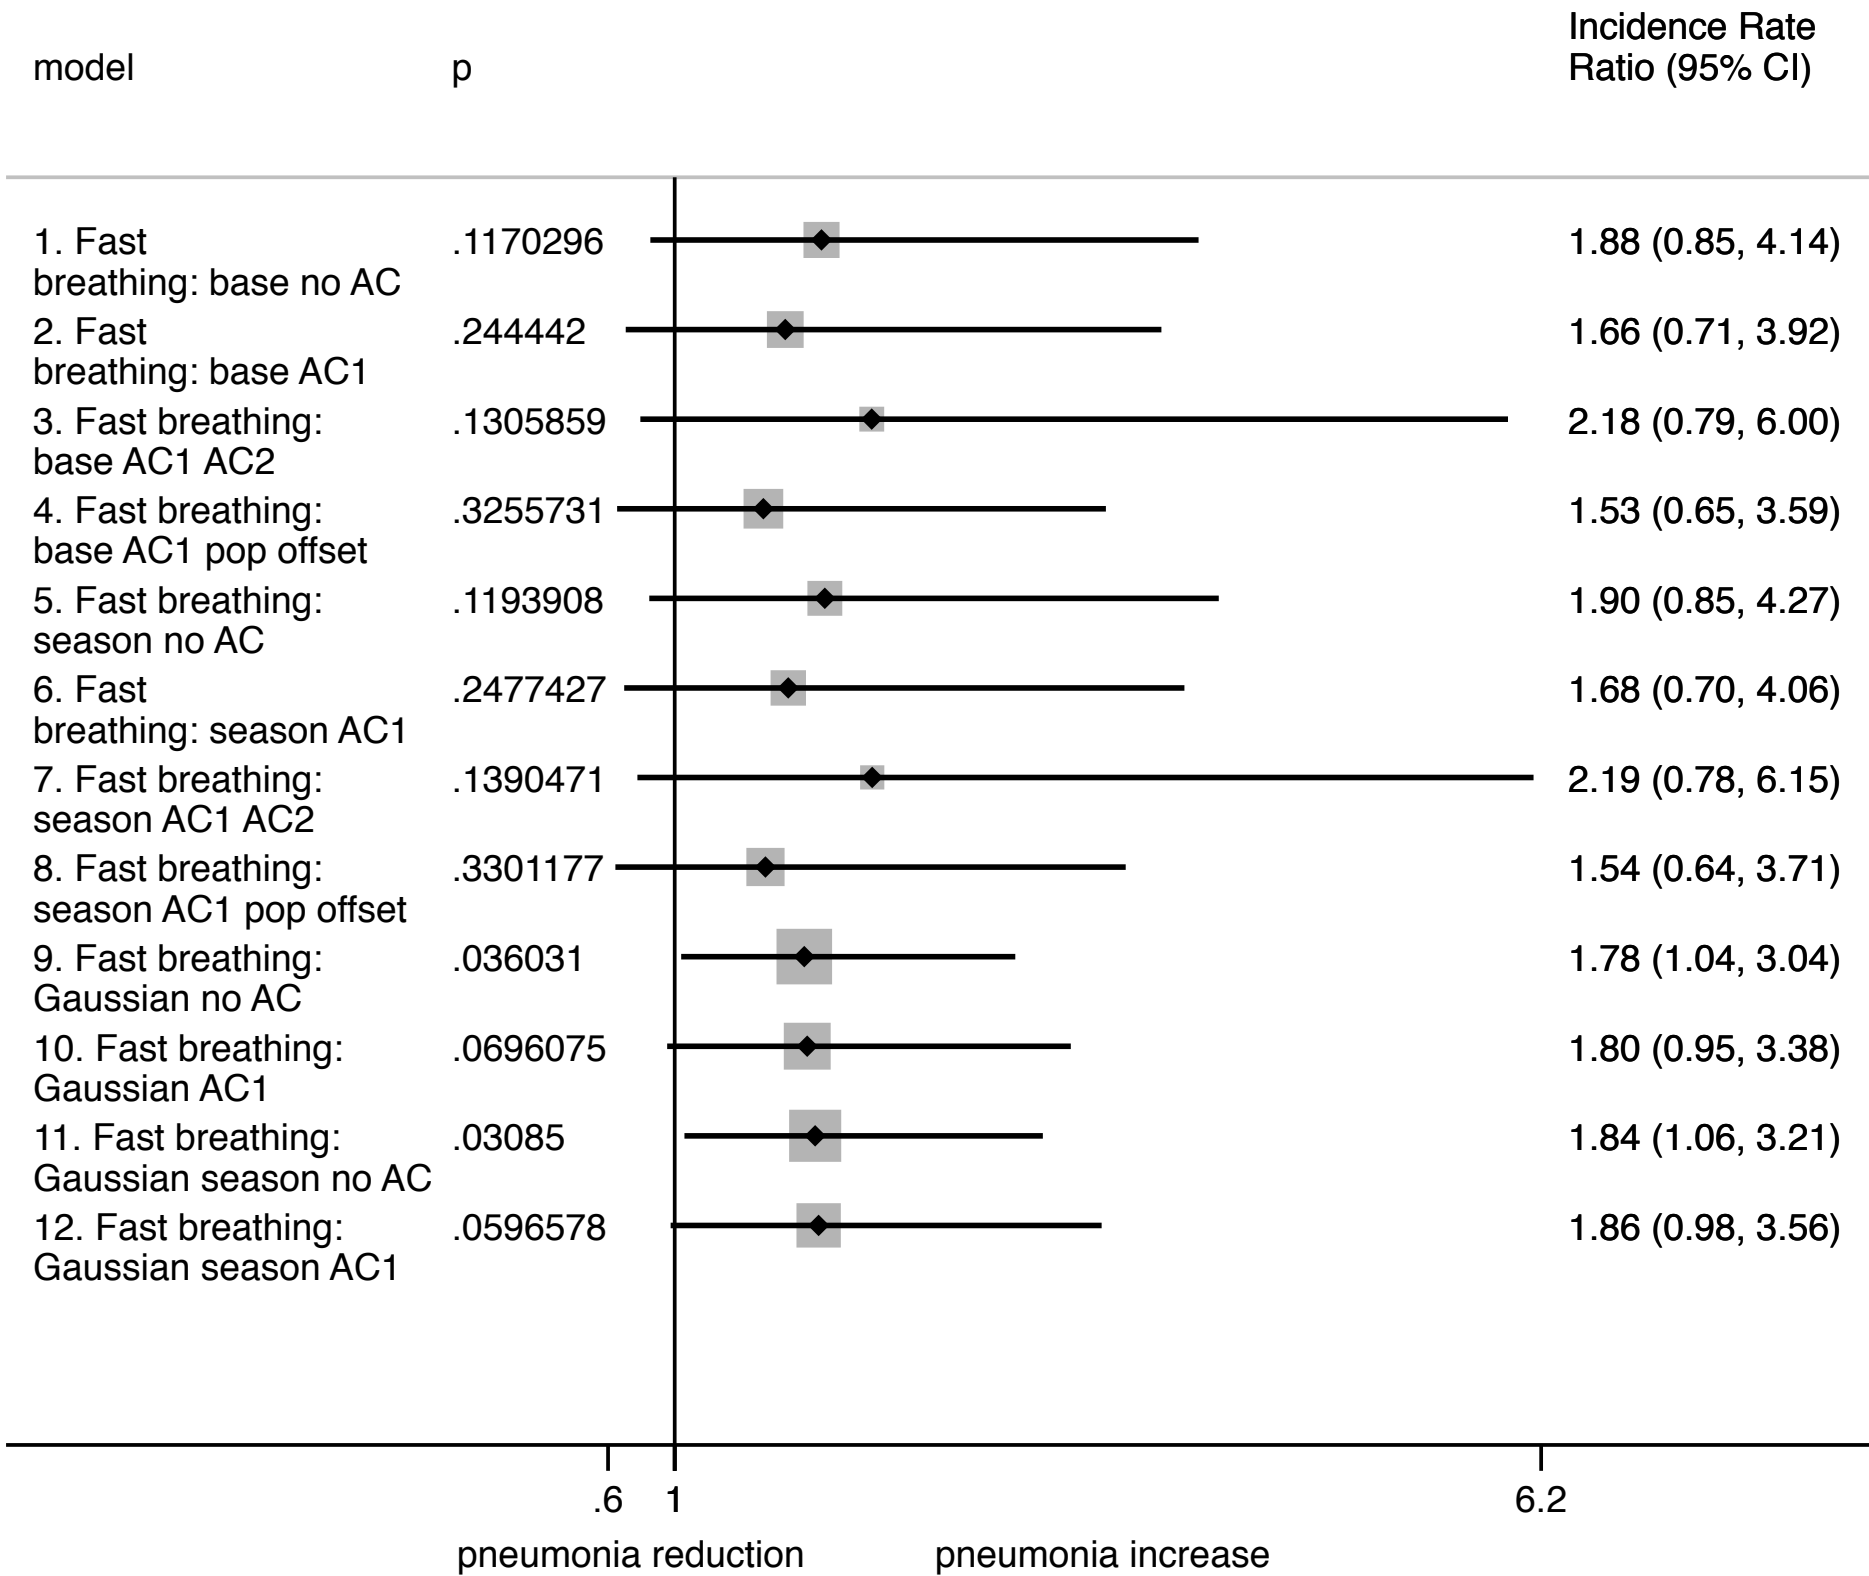

Figure A7.10

# Sensitivity Analysis for Chest indrawing pneumonia models - Health Centres

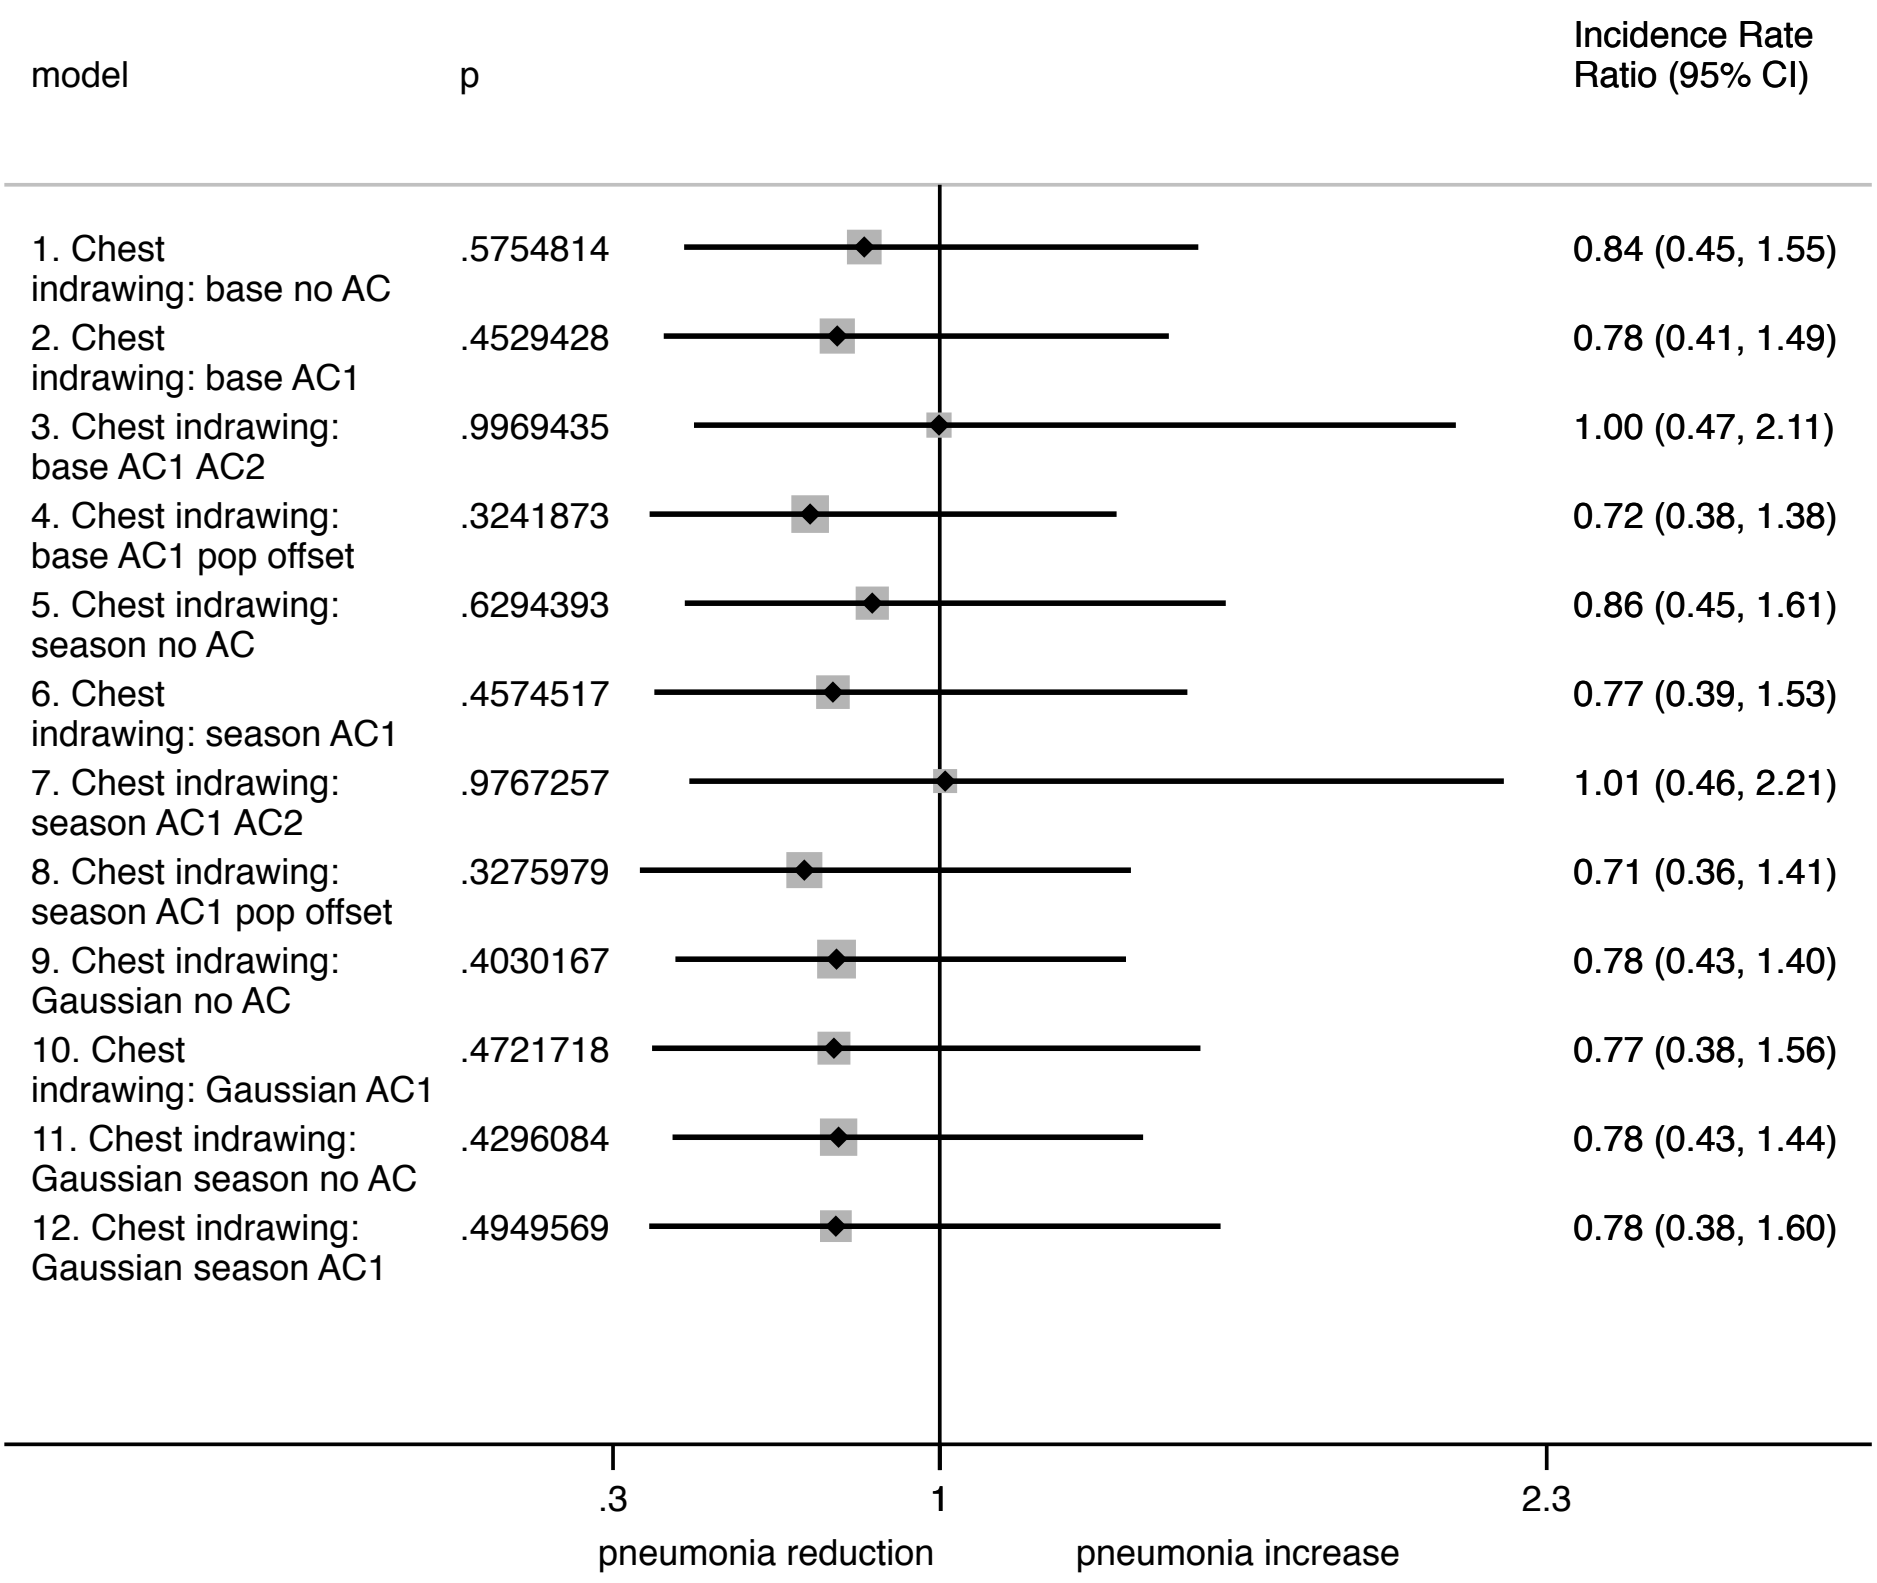

Figure A7.11

## Sensitivity Analysis for Danger sign(s) pneumonia models - Health Centres

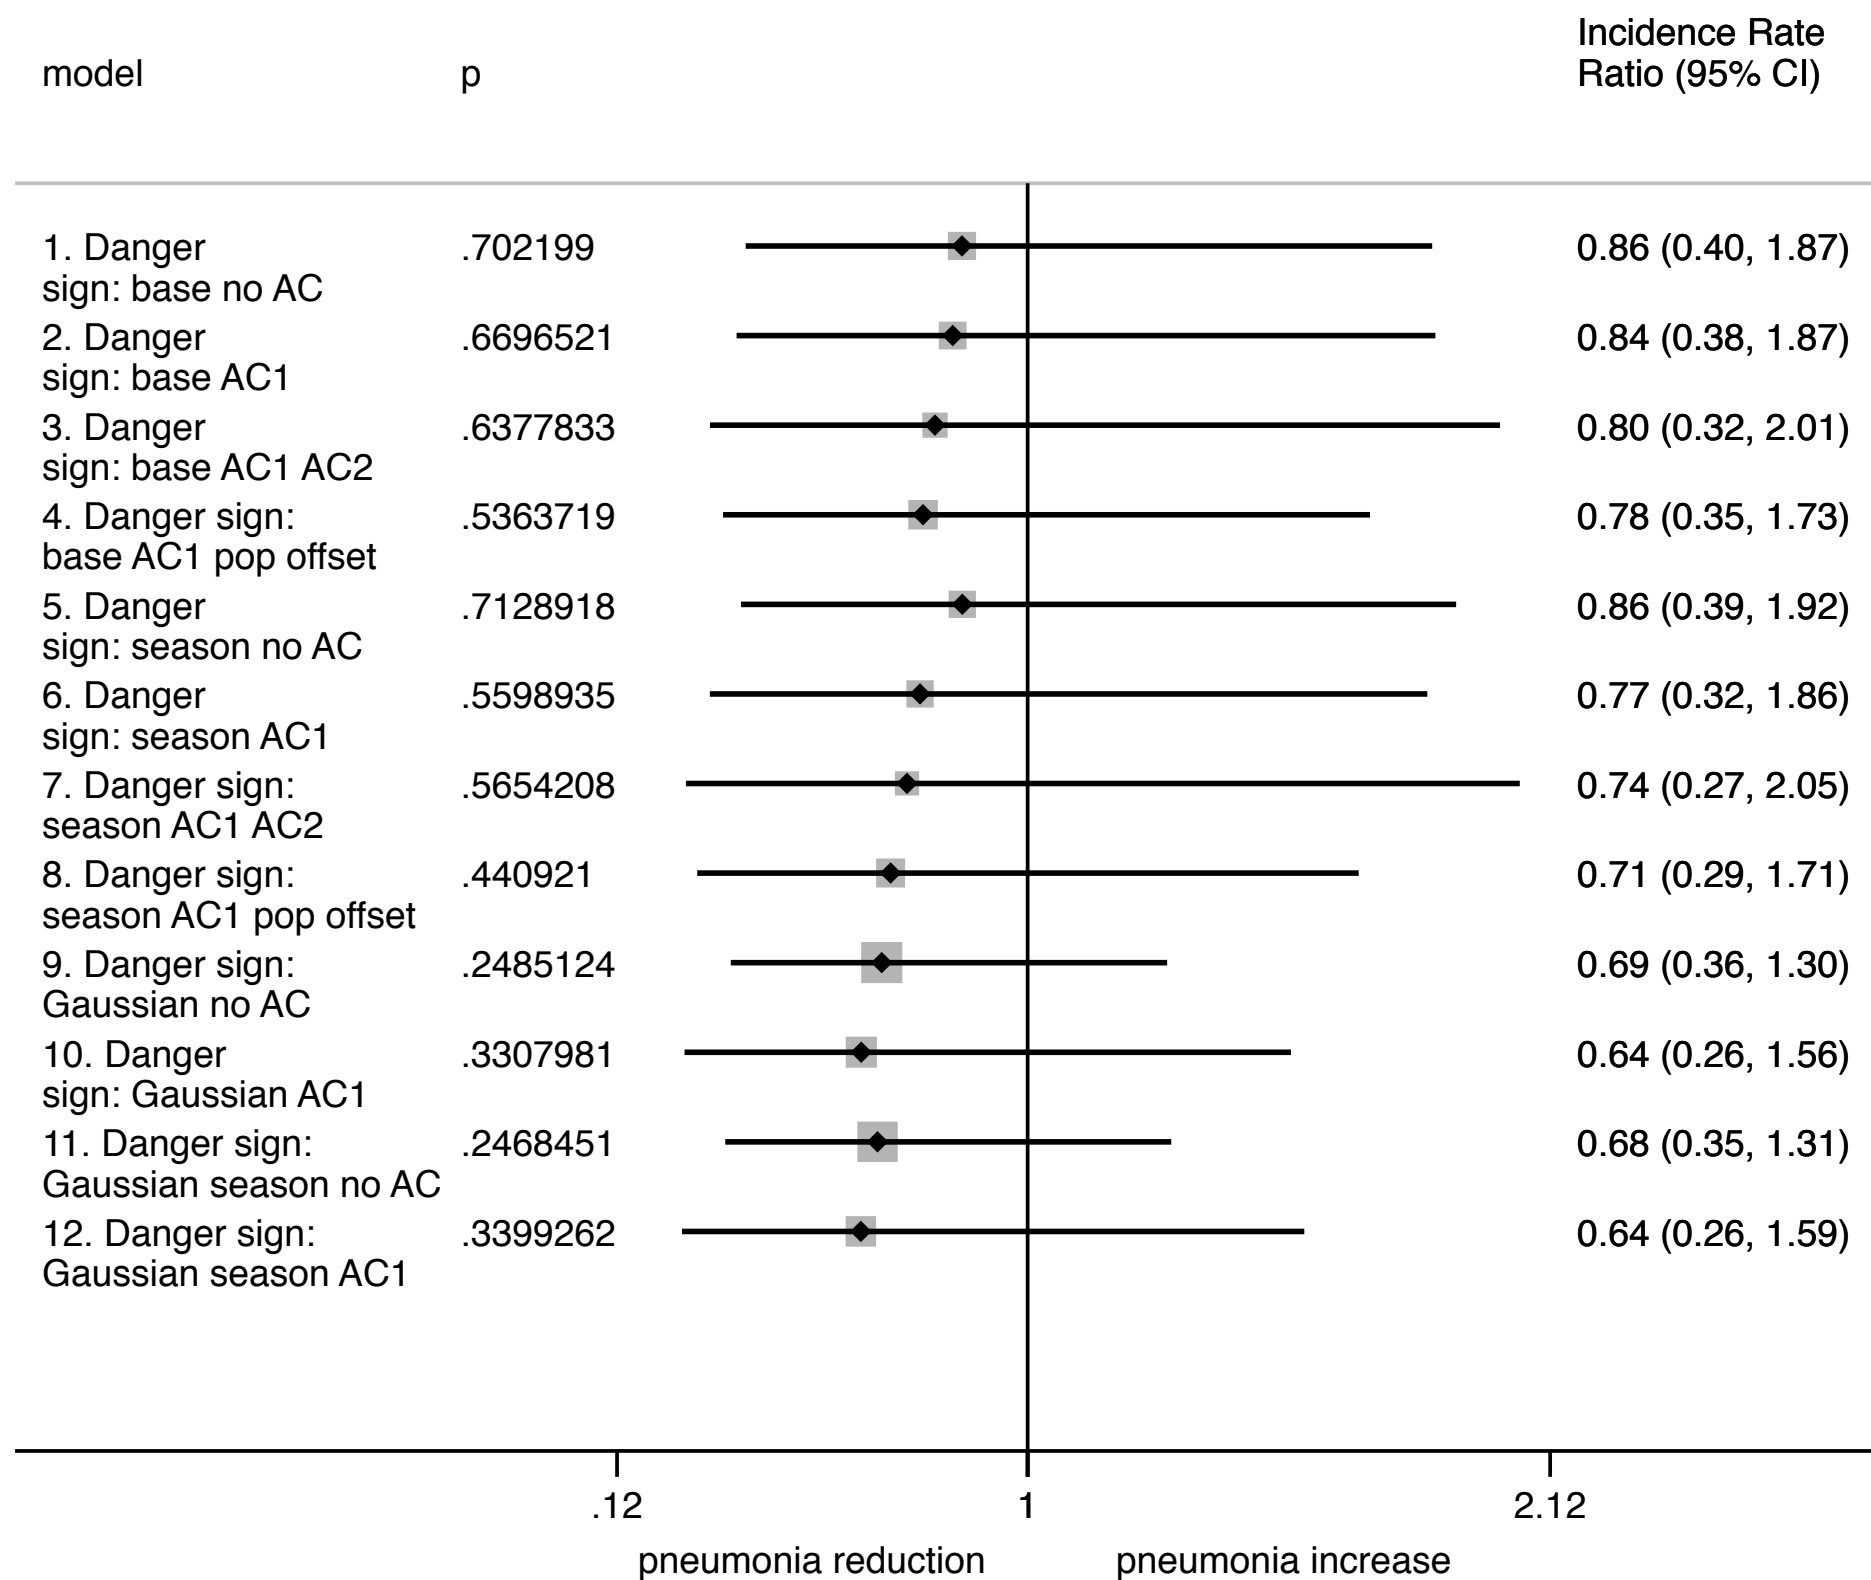

Figure A7.12

## Sensitivity Analysis for Hypoxemic pneumonia models - Health Centres

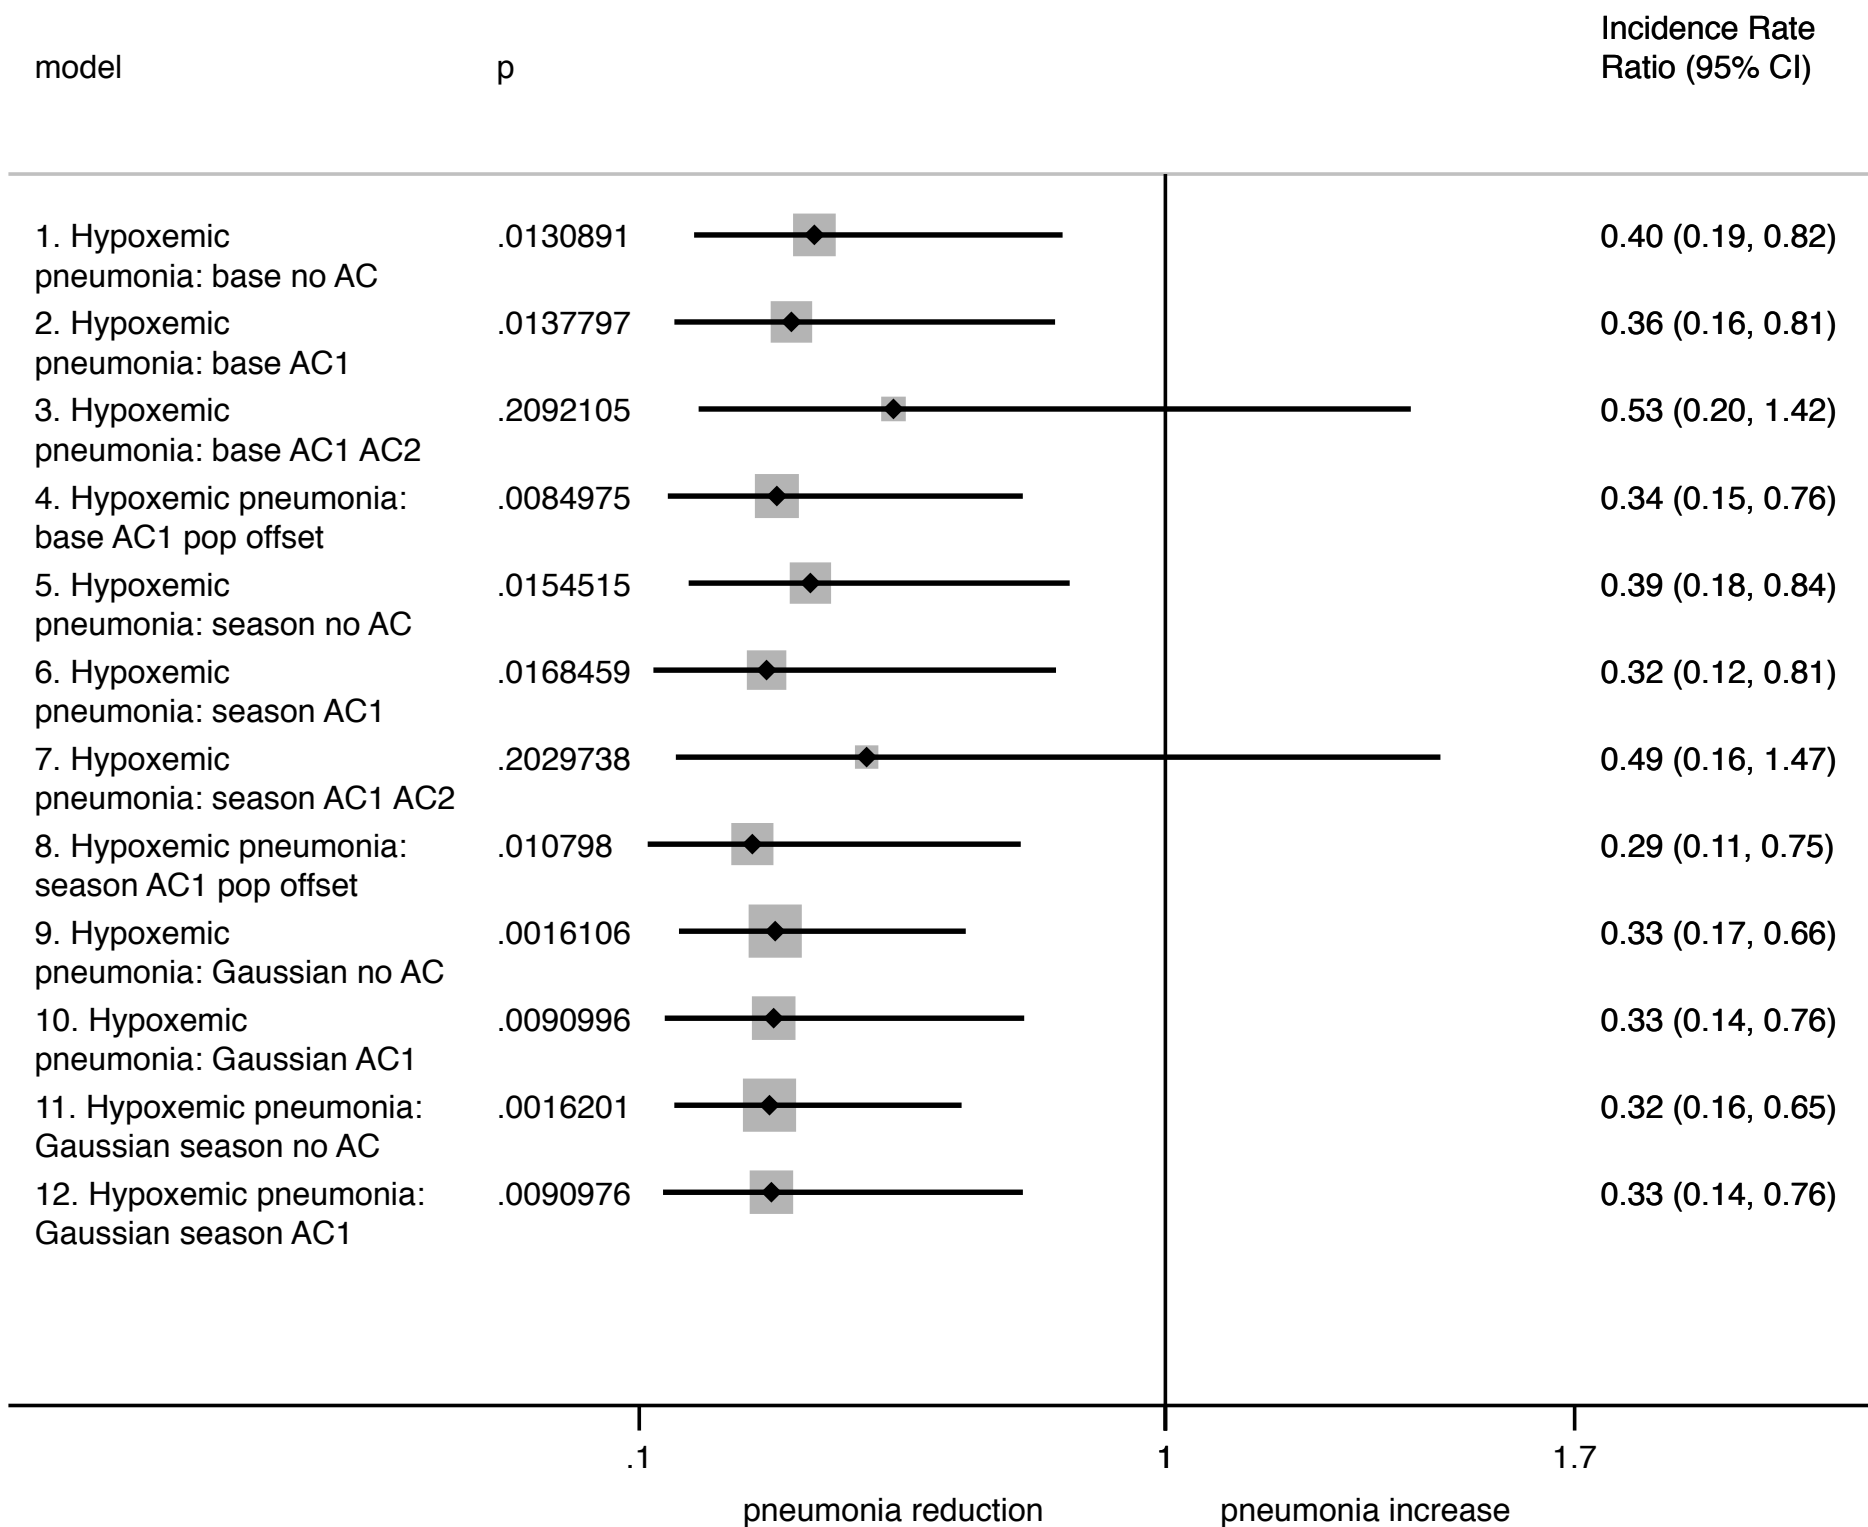

Figure A7.13

# Sensitivity Analysis for proportion danger sign pneumonia models - Health Centres

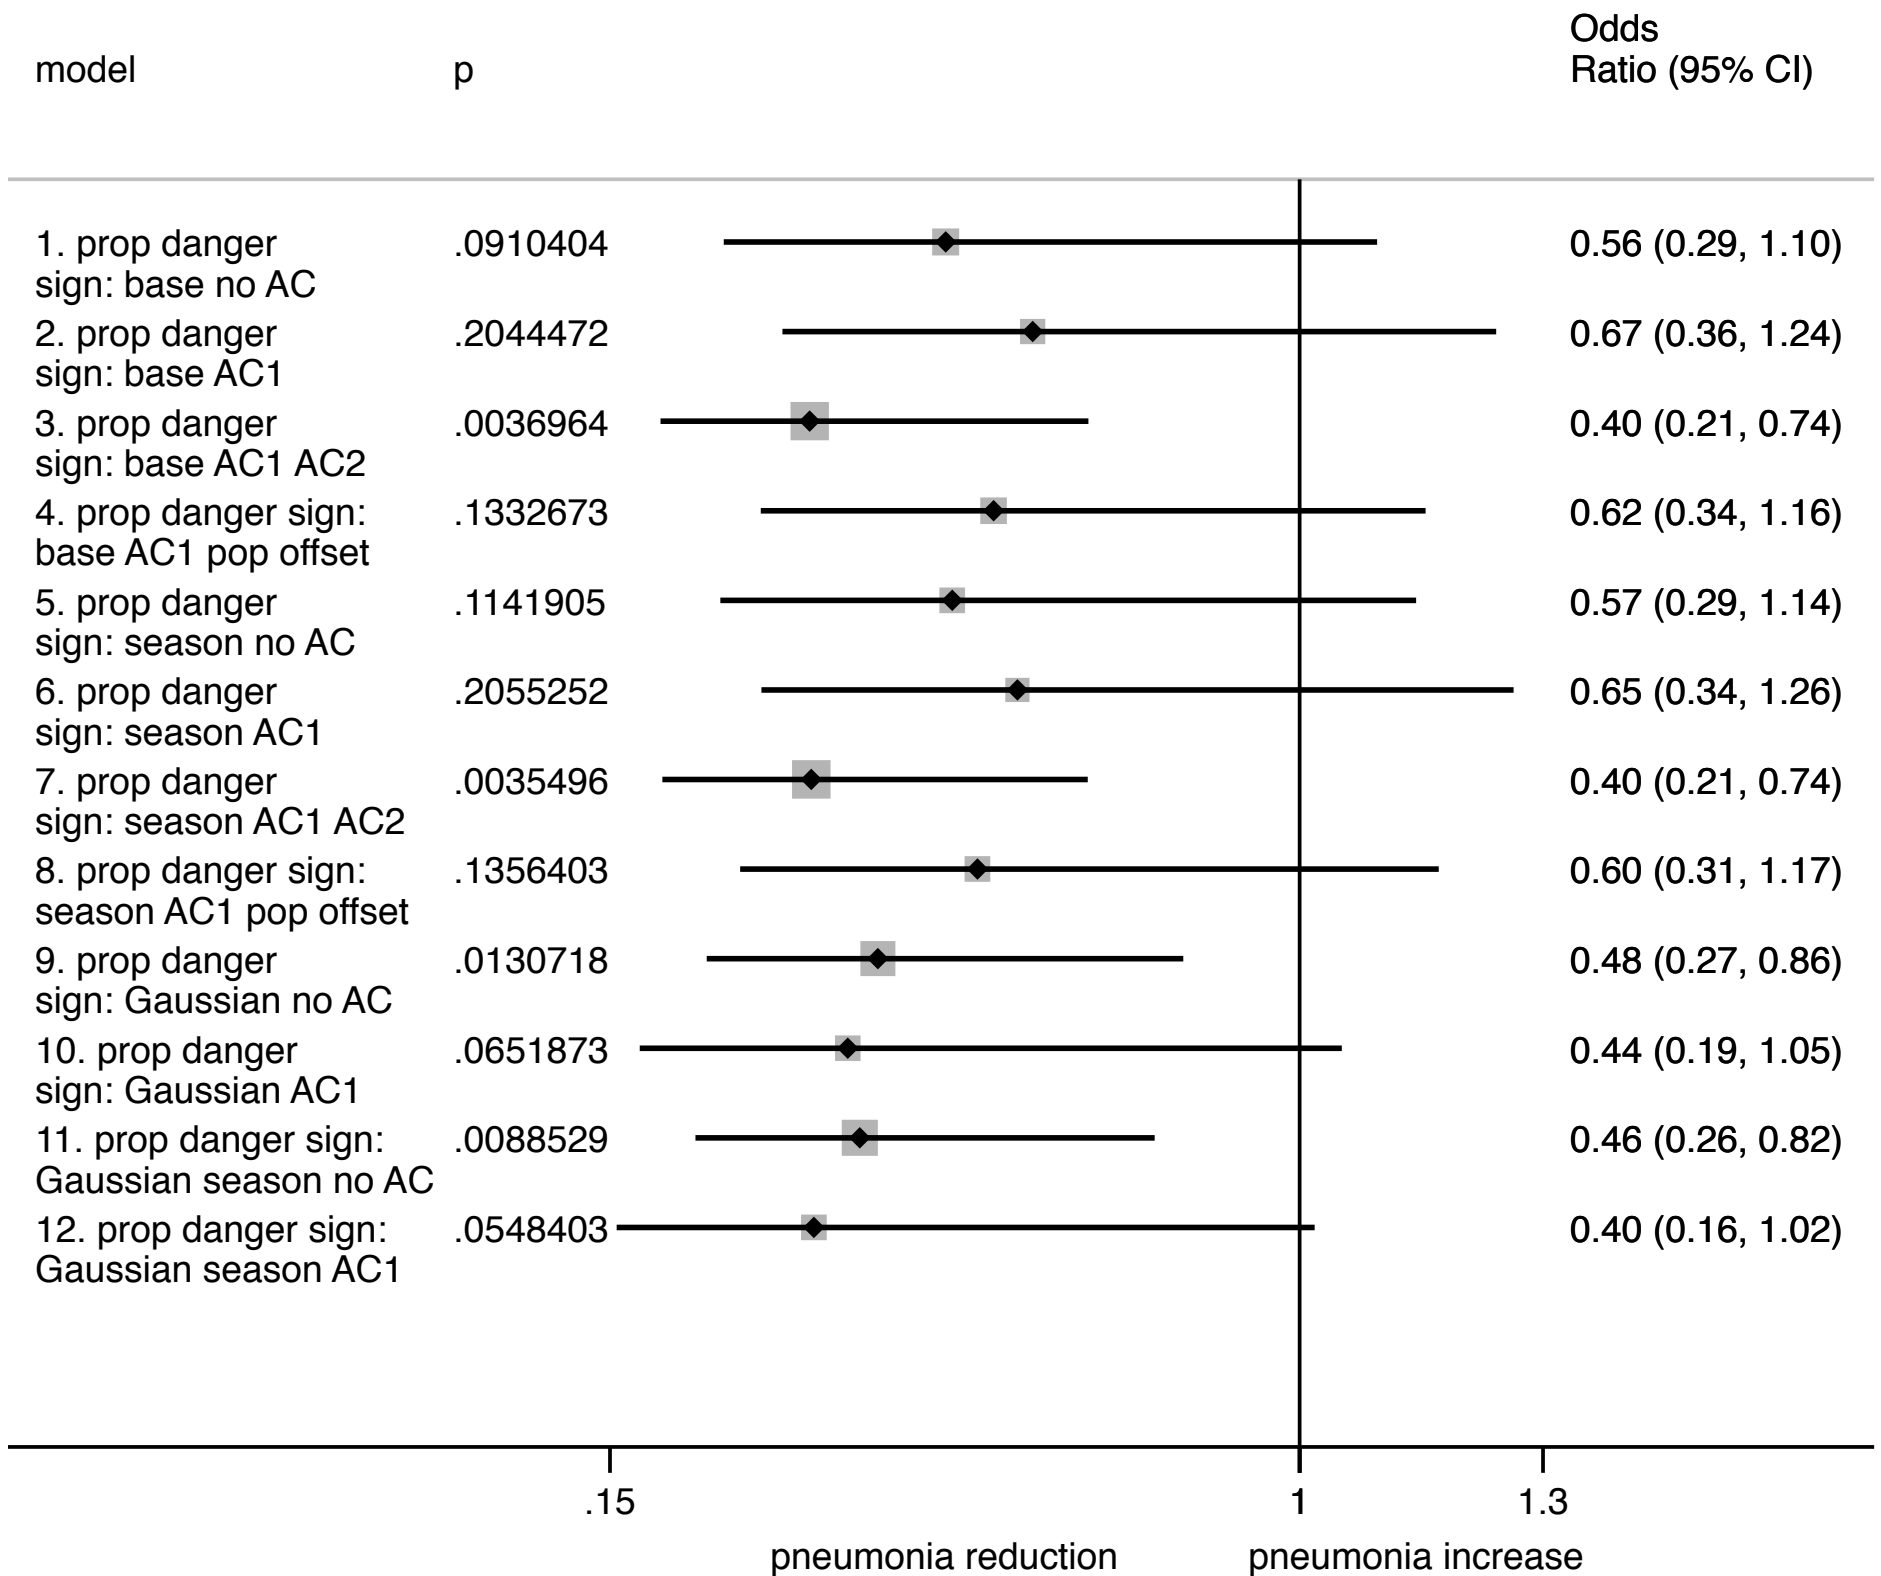



Figure A7.14

# Sensitivity Analysis for All clinical pneumonia models - Community Health Worker clinics

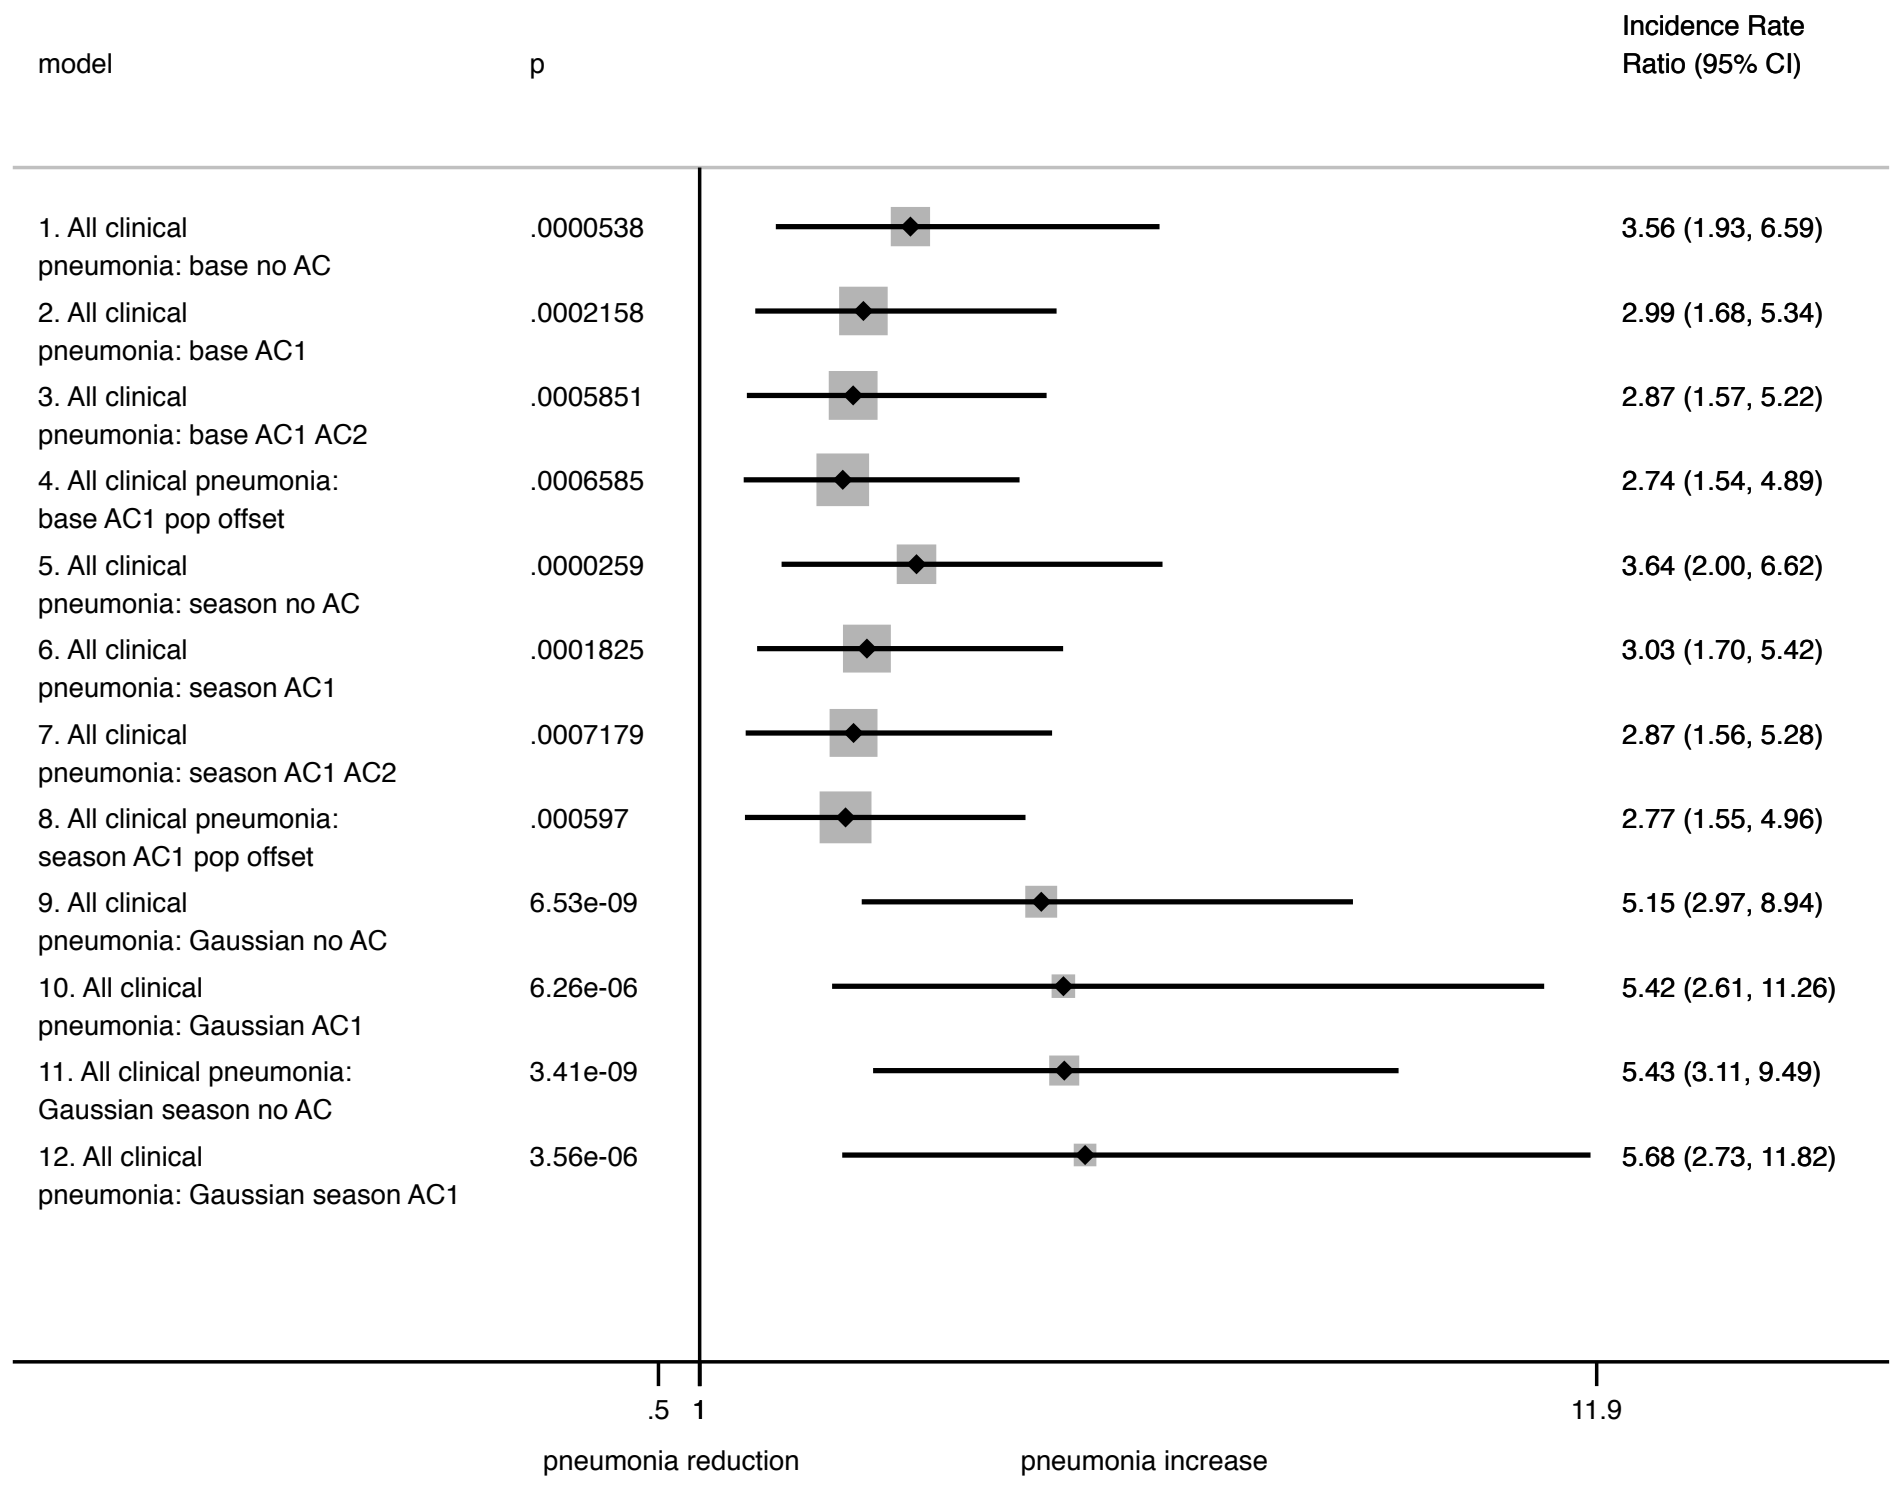

Figure A7.15

# Sensitivity Analysis for Fast breathing pneumonia models - Community Health Worker clinics

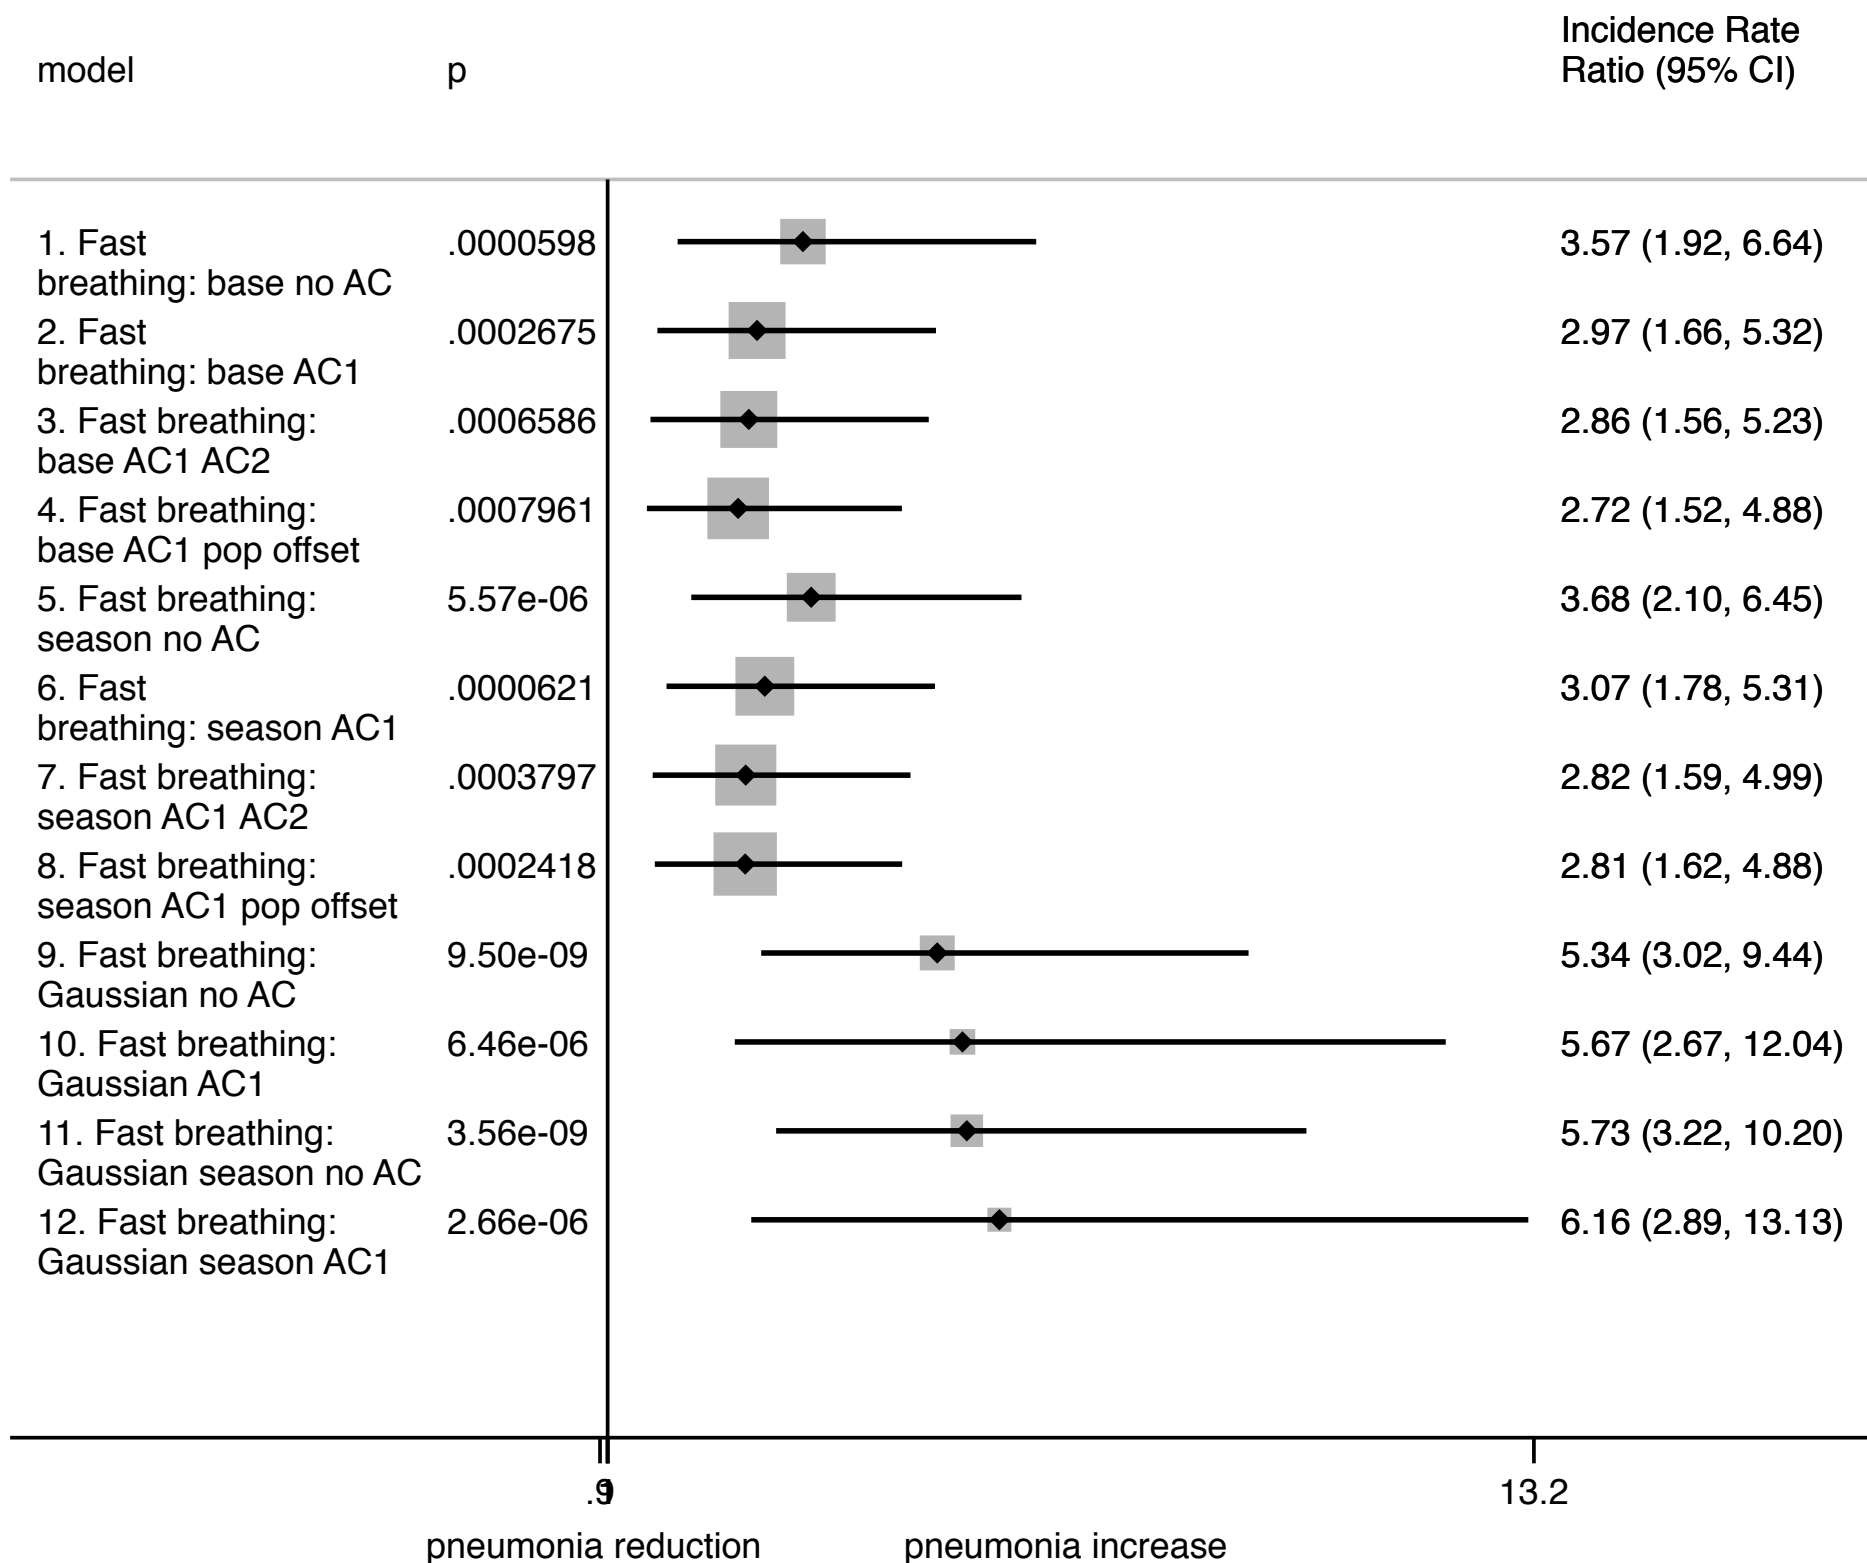

Figure A7.16

# Sensitivity Analysis for Chest indrawing pneumonia models - Community Health Worker clinics

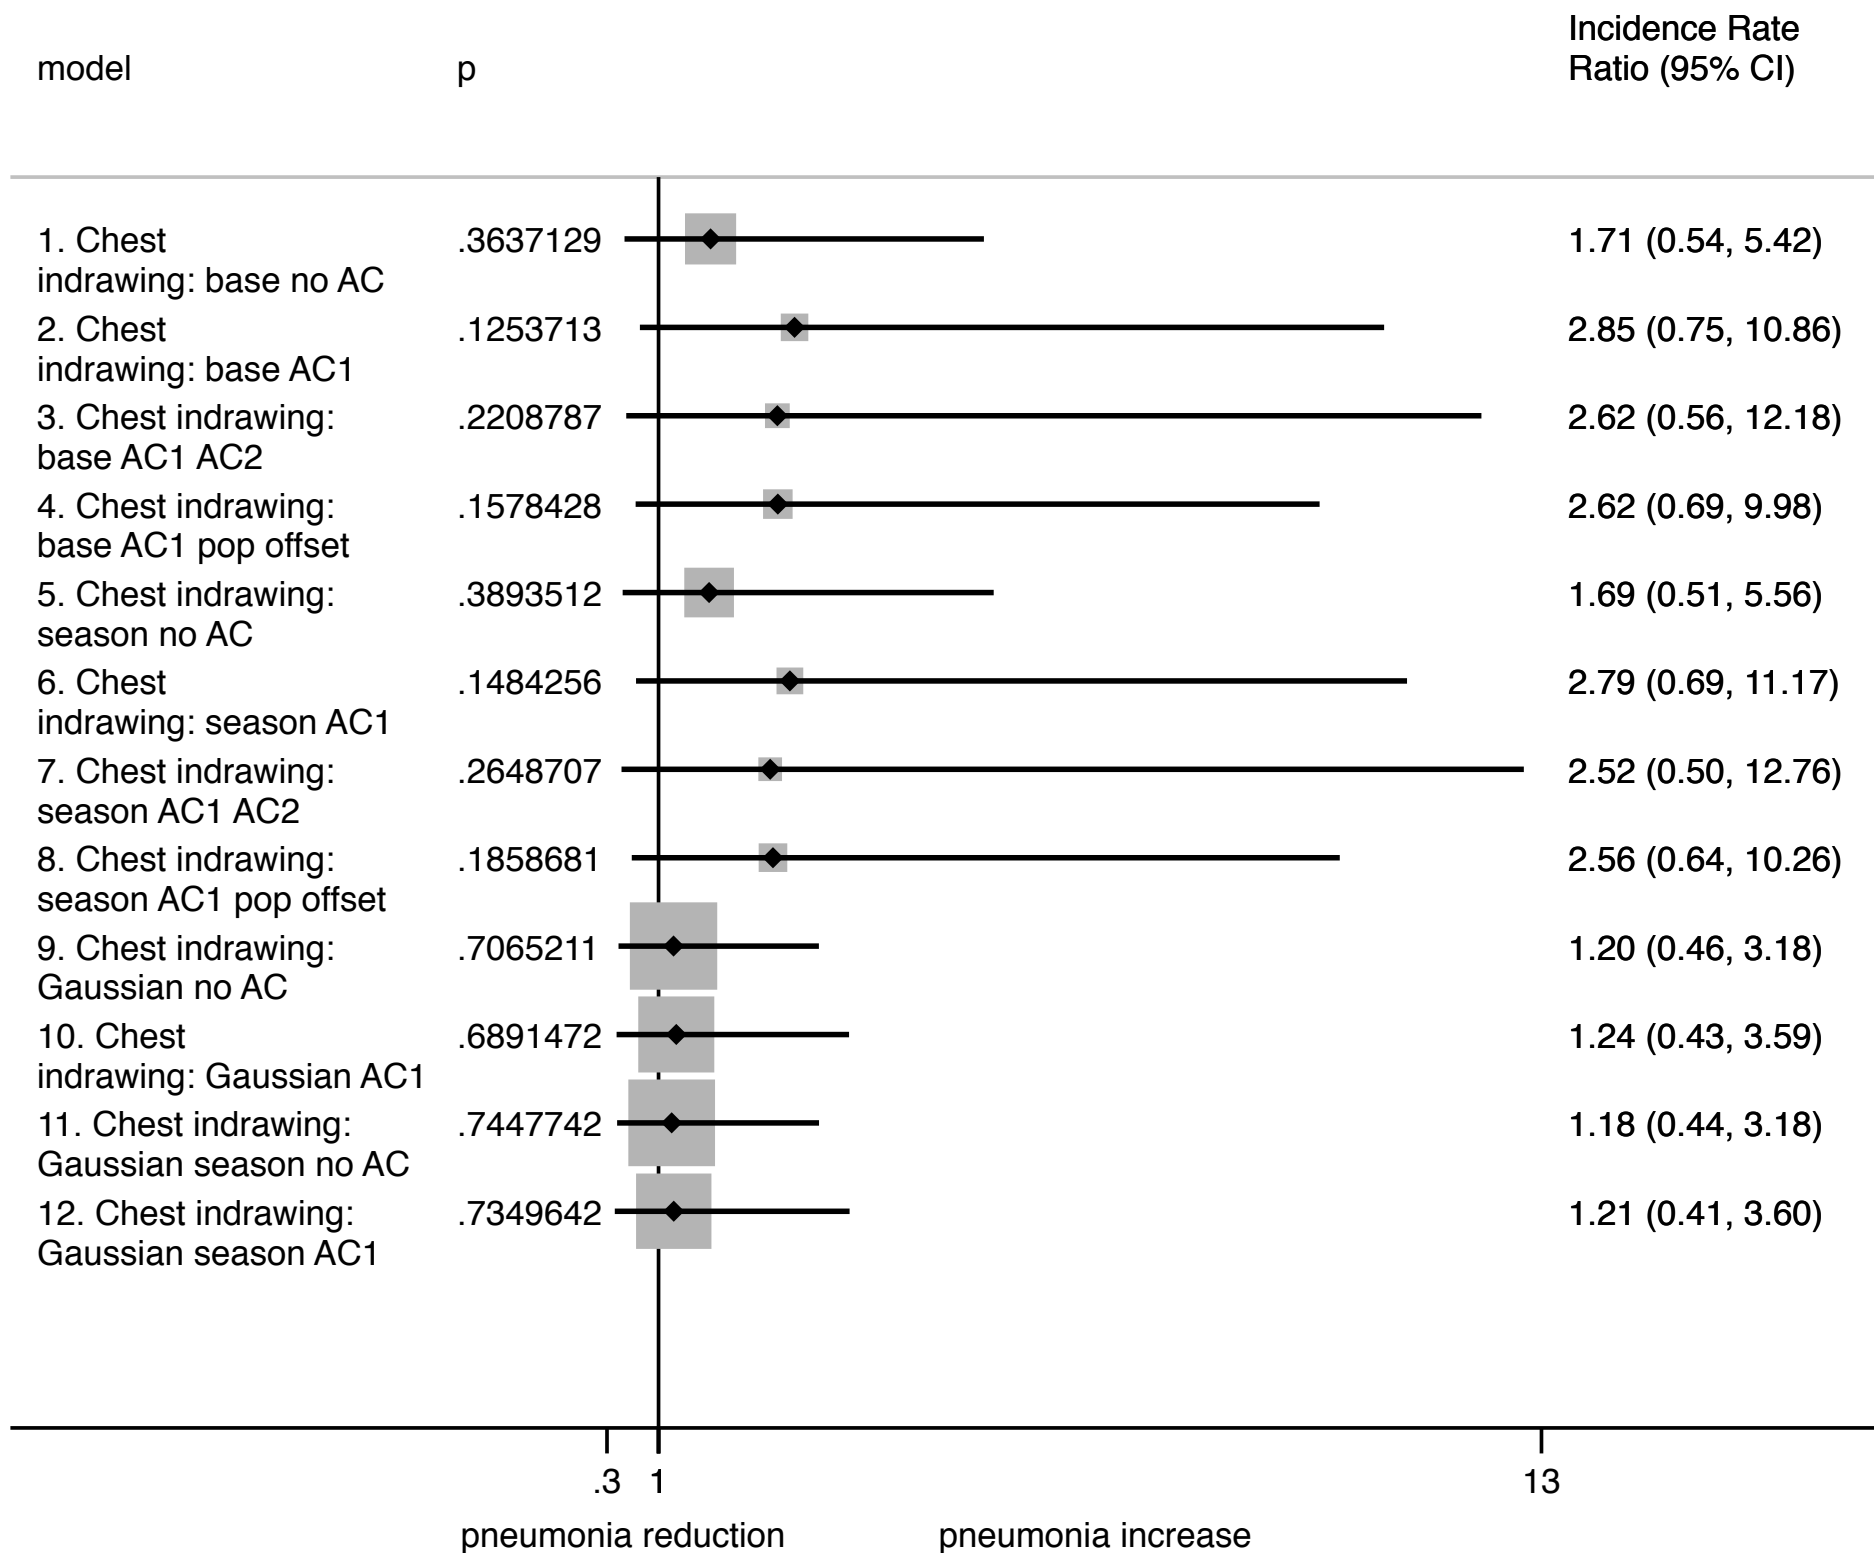

Figure A7.17

# Sensitivity Analysis for Danger sign(s) pneumonia models - Community Health Worker clinics

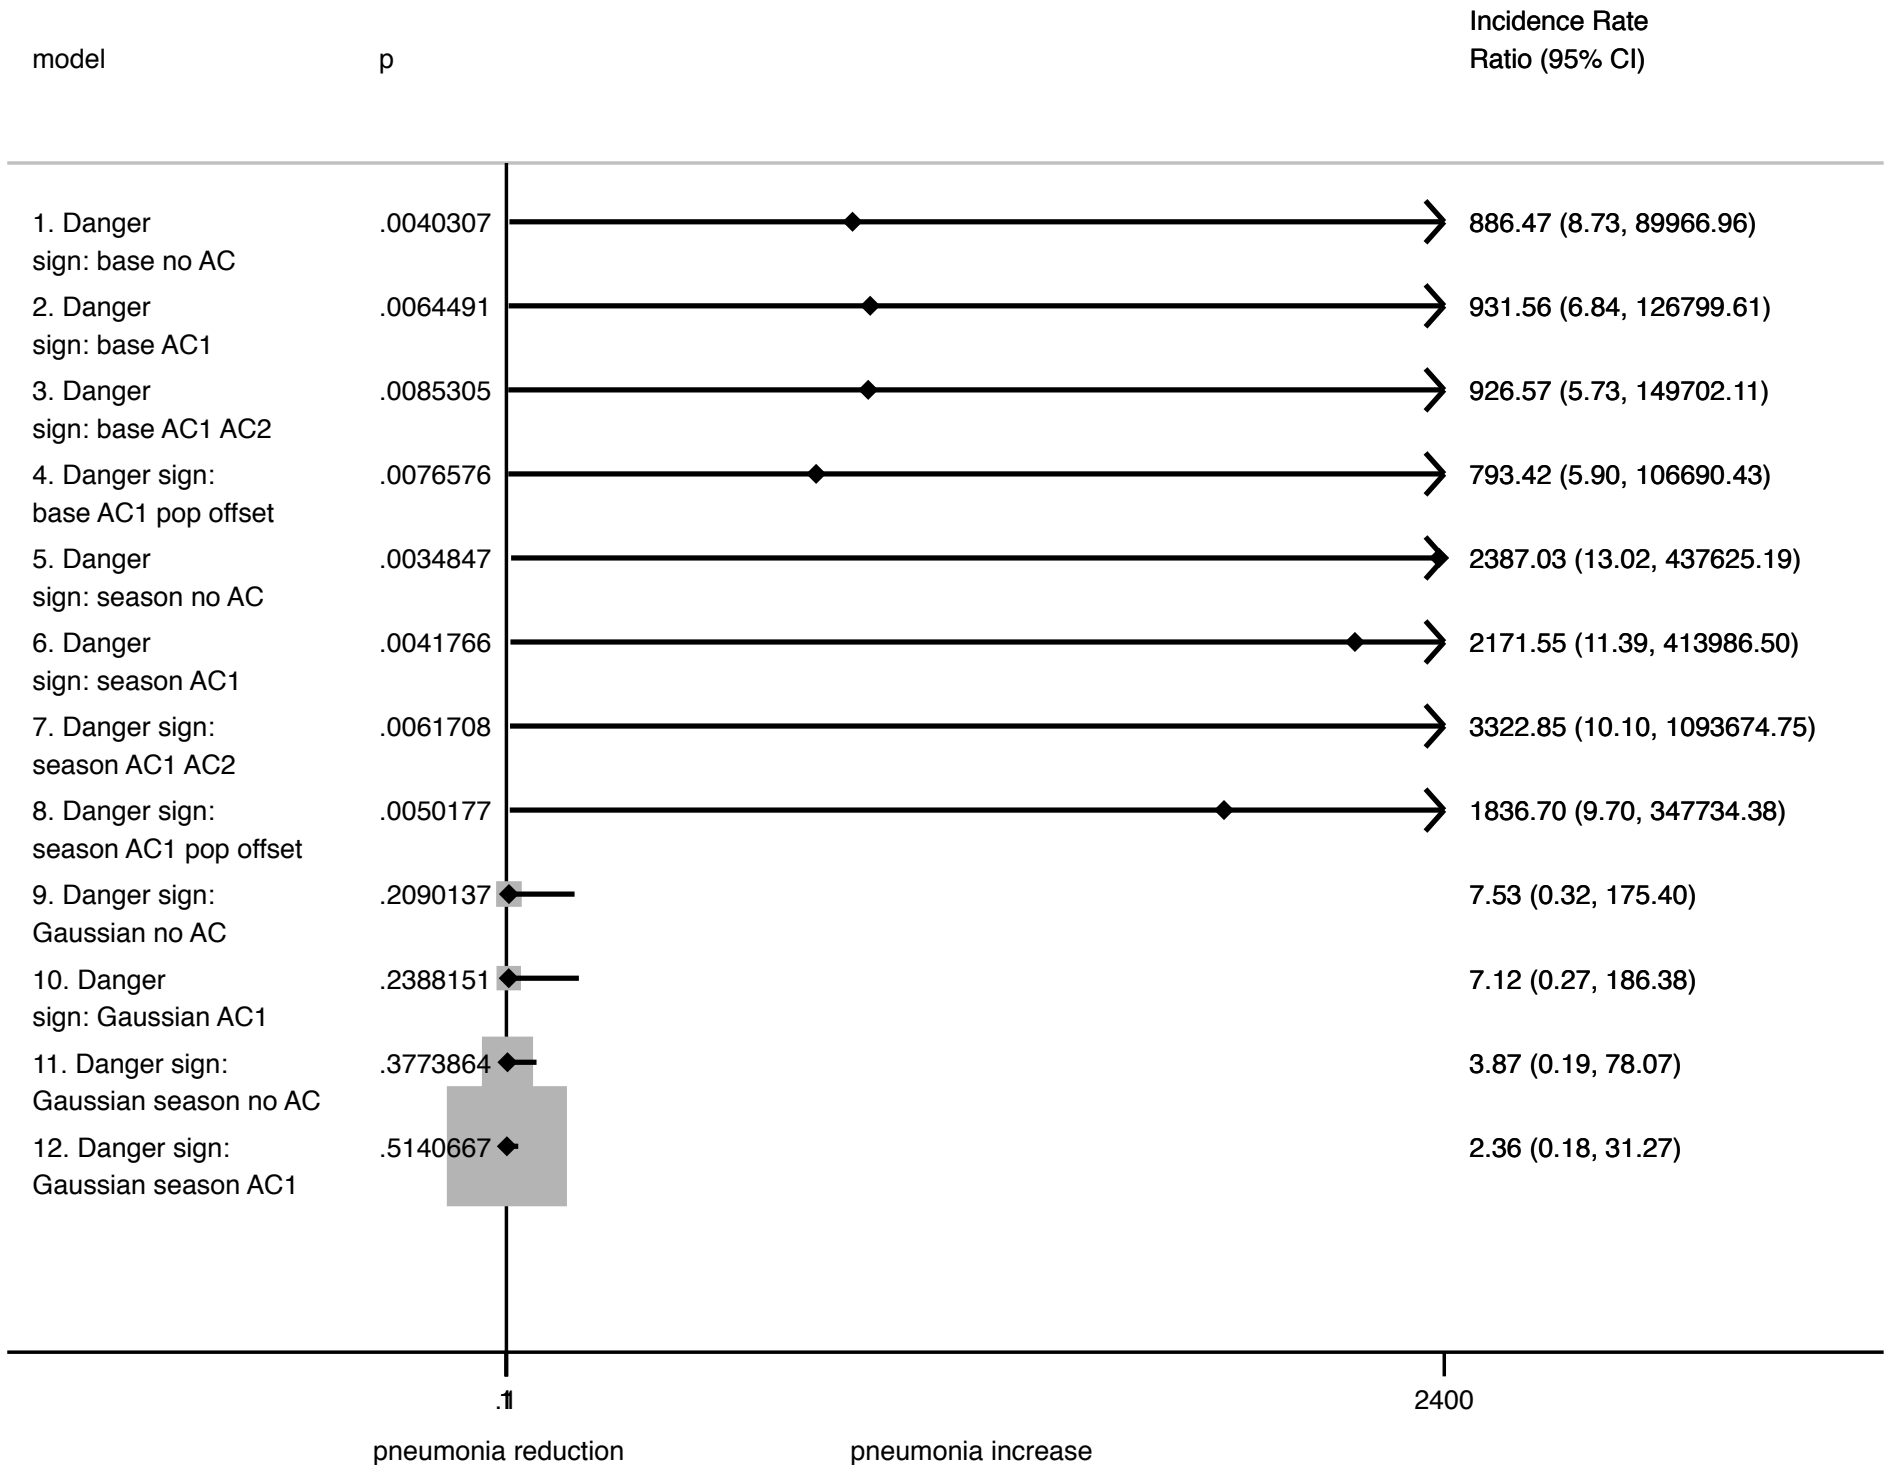

Figure A7.18

# Sensitivity Analysis for Hypoxemic pneumonia models - Community Health Worker clinics

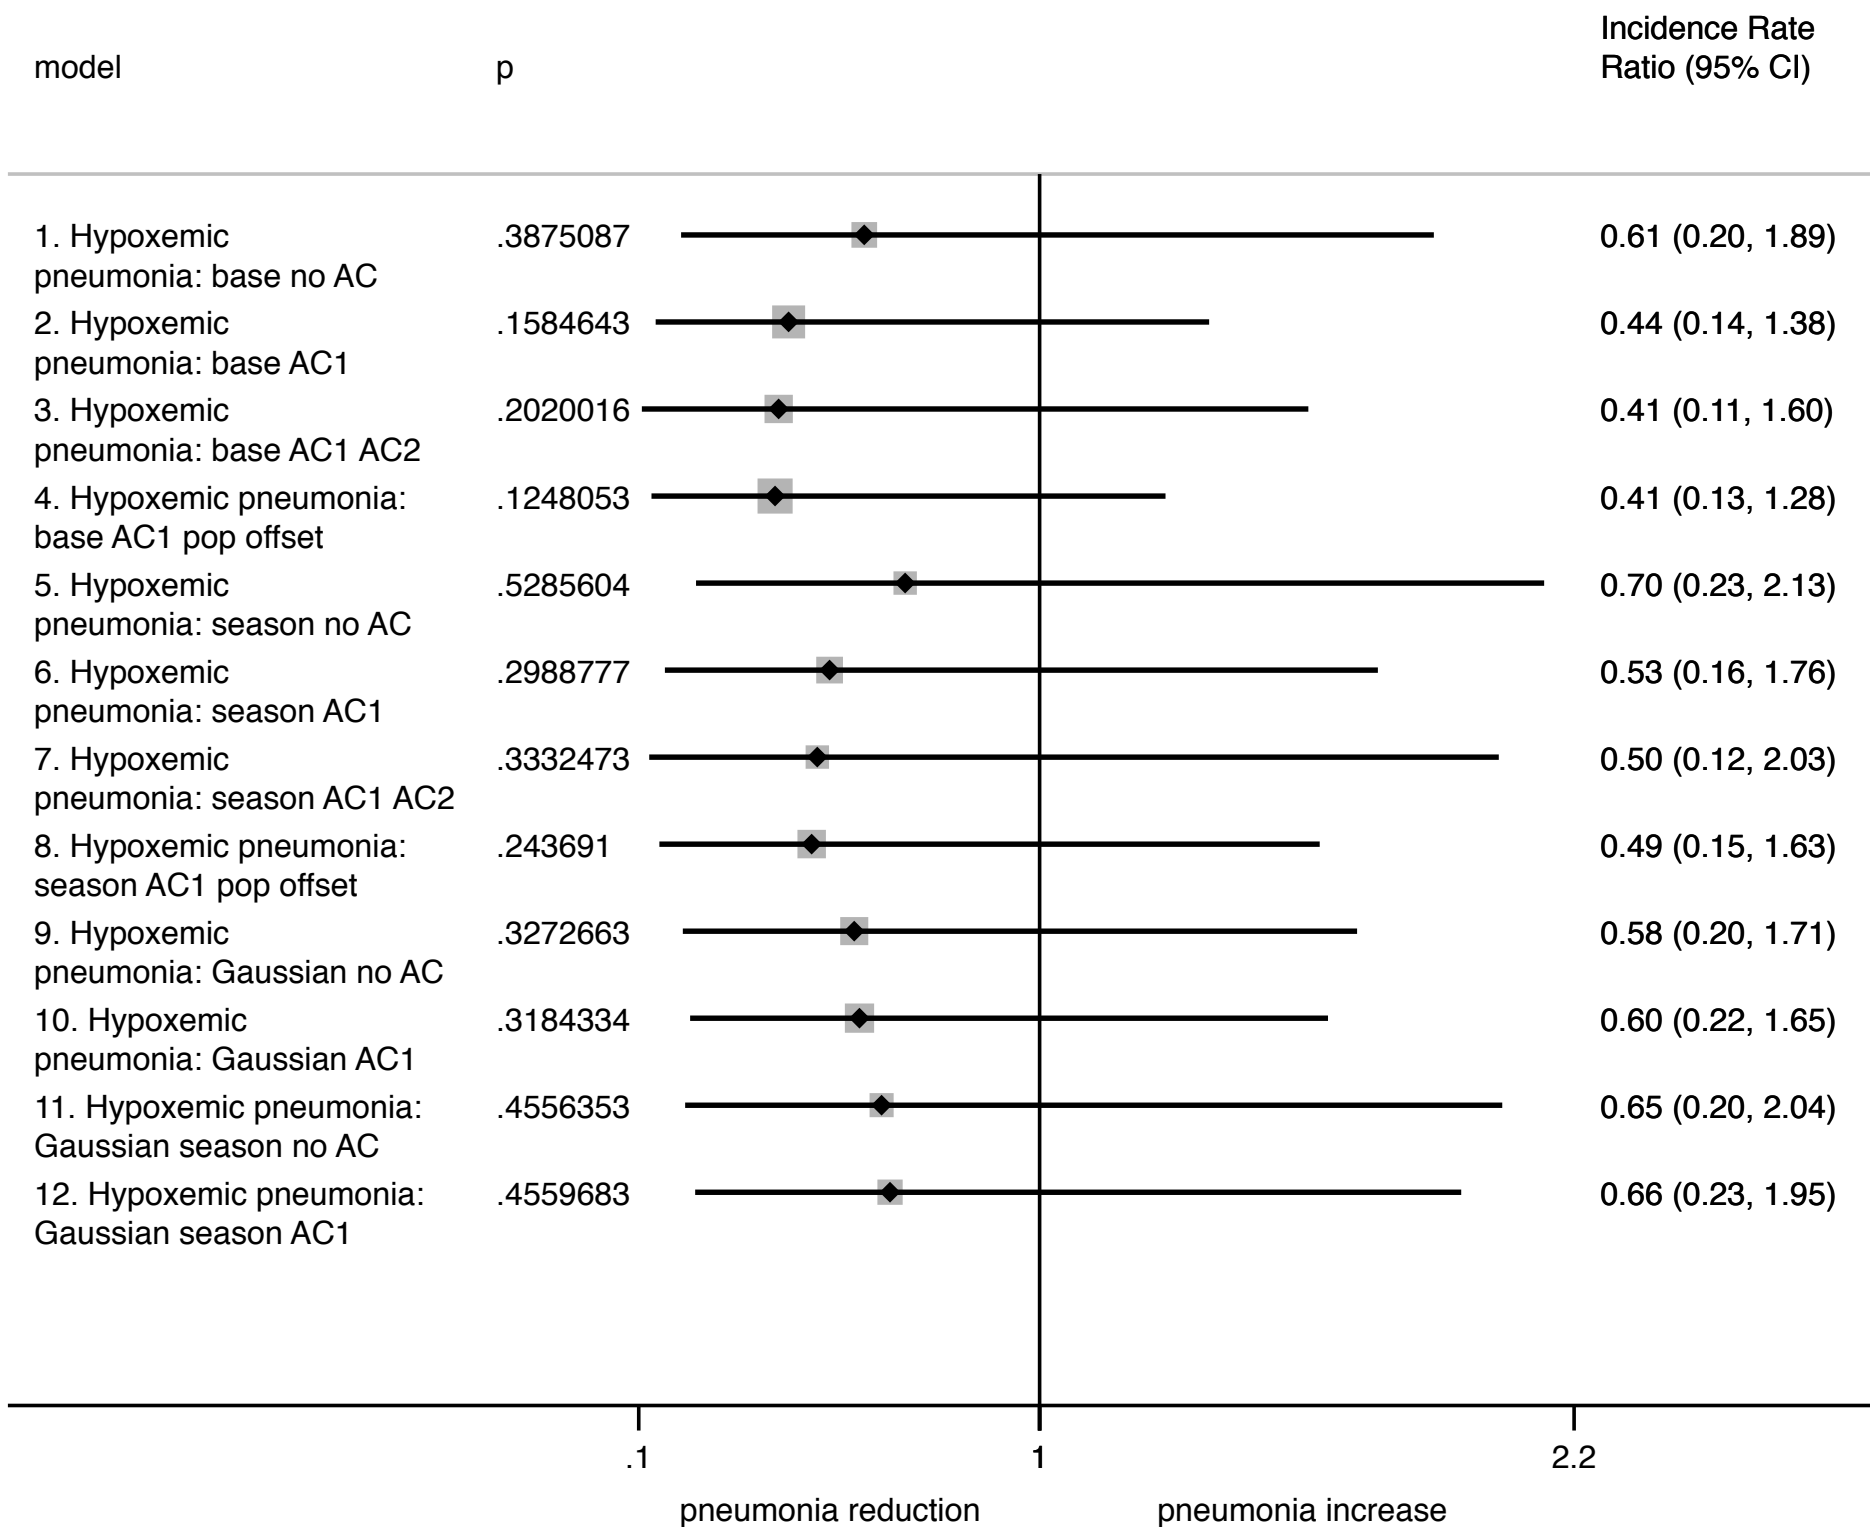

Figure A7.19

Sensitivity Analysis for proportion danger sign pneumonia models - Community Health Worker clinics

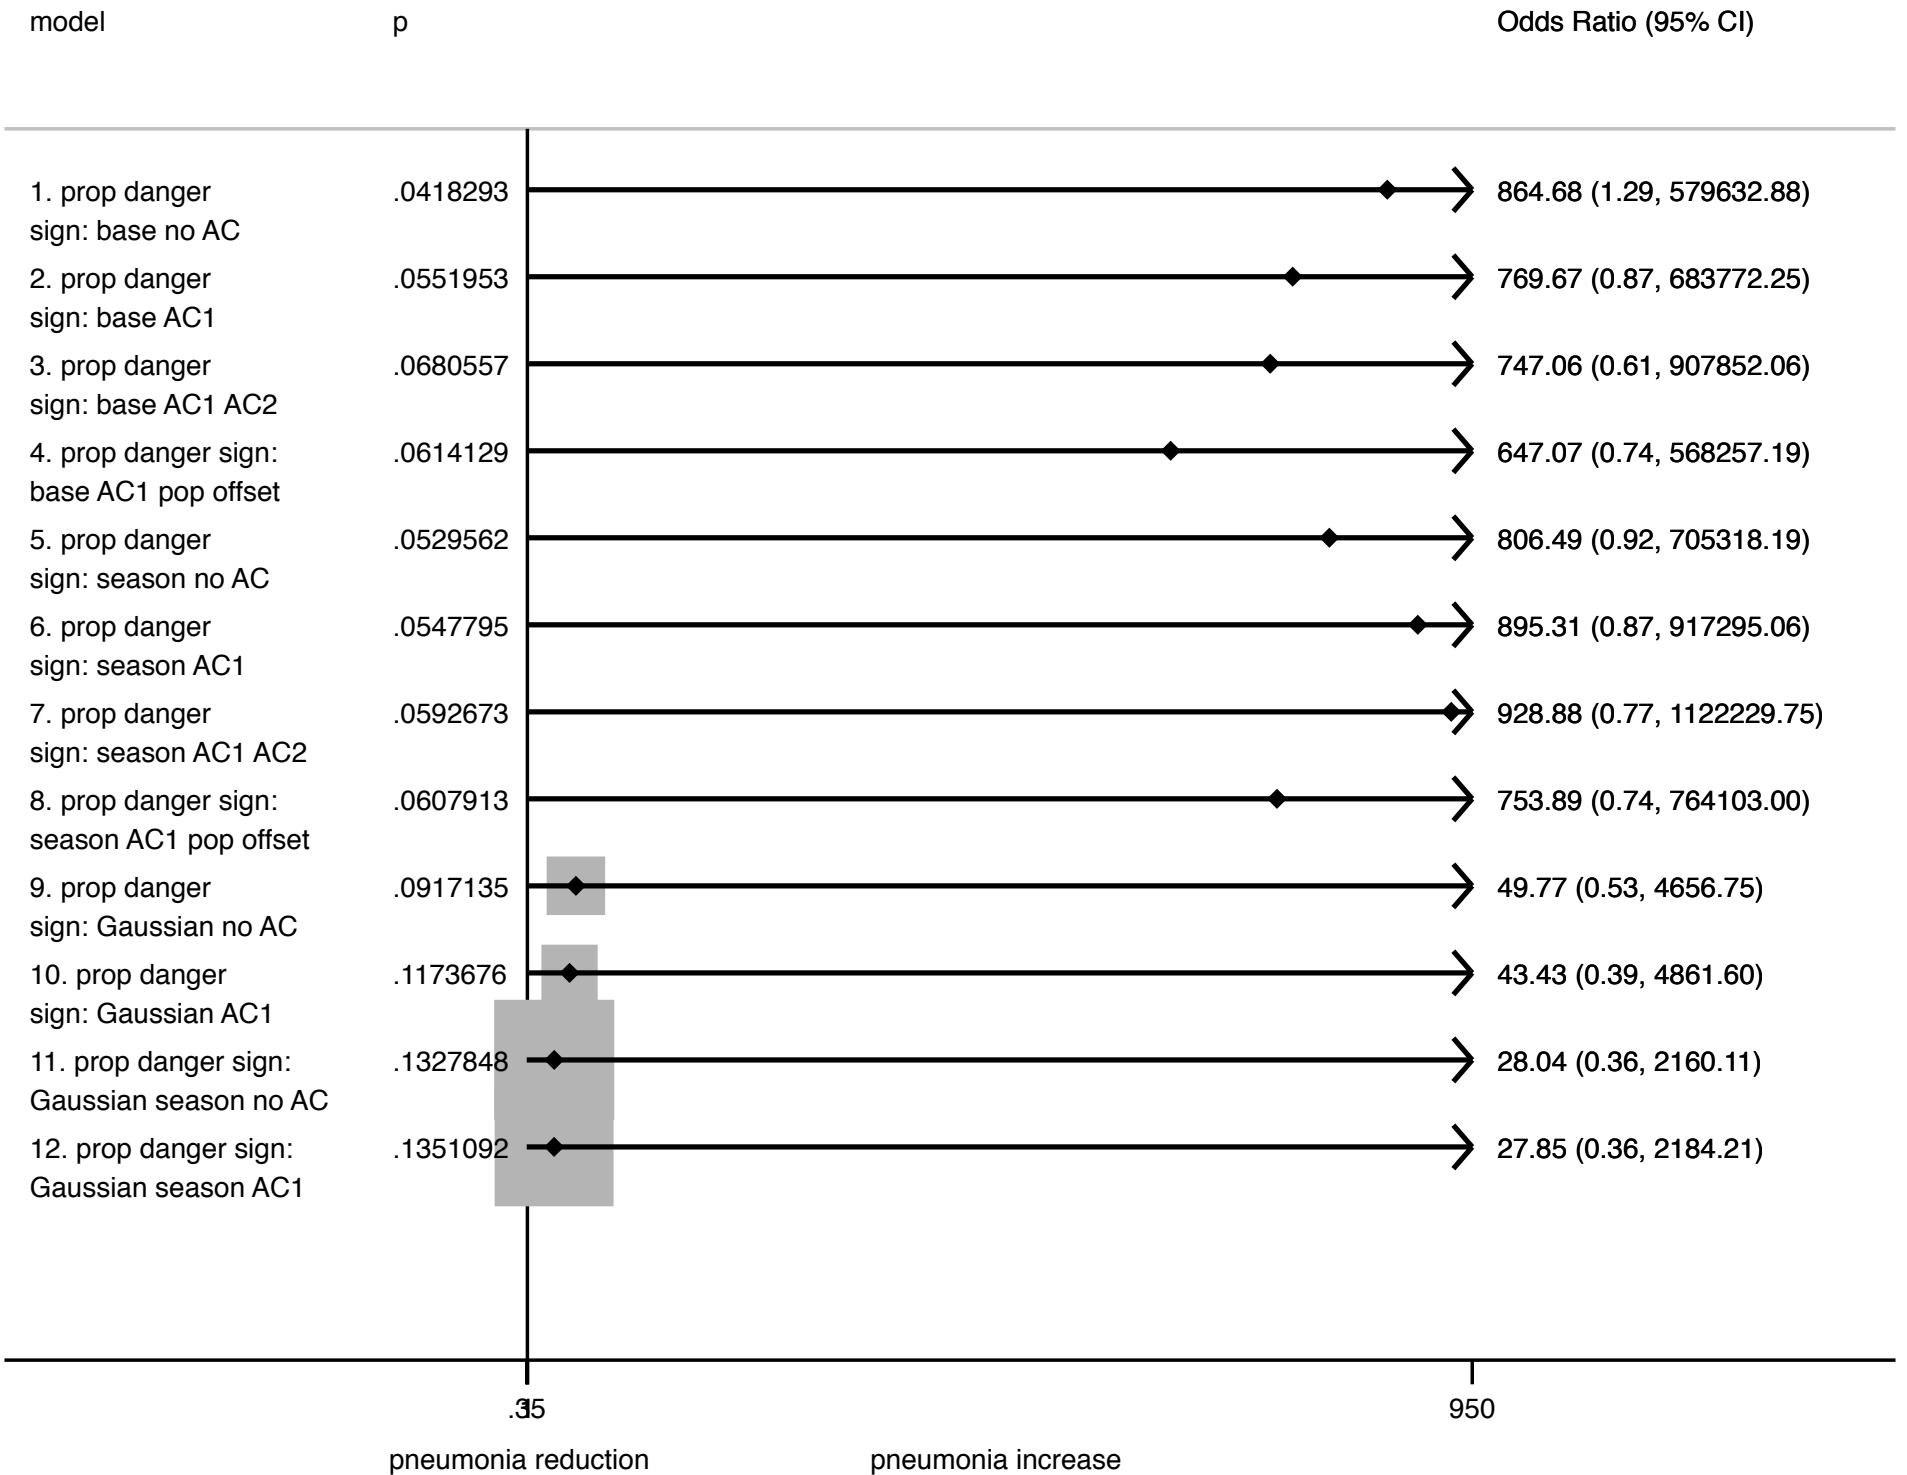

Supplement: pone.0168209.s007.pdf [file pone.0168209.s007.pdf]
