# Supplementary material for: Impact of the 13-Valent Pneumococcal Conjugate Vaccine on Clinical and Hypoxemic Childhood Pneumonia over Three Years in Central Malawi: An Observational Study
Source: PubMed Central journal article supplement (PMC5215454; doi:10.1371/journal.pone.0168209), 2017-01-04

## Appendix 8: Time-Series Regression Results with Age Category as an Effect Modifier

Table A8: Age Category as an Effect Modifier: Time-series regression results with the association of 76% three-dose PCV13 coverage on pneumonia outcomes highlighted

| Model and covariate <sup>a</sup>      | All clinical pneumonia <sup>a</sup> |  |  |  |  |  |
|---------------------------------------|-------------------------------------|--|--|--|--|--|
|                                       | IRR (95%CI); p-value                |  |  |  |  |  |
| <i>agecat*3dose</i> (B <sub>i</sub> ) |                                     |  |  |  |  |  |
| 0-5 months                            | 1.027 (0.891, 1.500)<br>p=0.891     |  |  |  |  |  |
| 6-23 months                           | 2.328 (1.652, 3.282)<br>p<0.0001    |  |  |  |  |  |
| 24-59 months                          | 1.028 (0.706, 1.497);<br>p=0.886    |  |  |  |  |  |
| <i>L1.dres</i> (B <sub>3</sub> )      | 1.028 (1.018 1.038);<br>p<0.0001    |  |  |  |  |  |
| constant (B <sub>0</sub> )            | 236.4 (182.0, 307.2);<br>p<0.0001   |  |  |  |  |  |

  

| Model and covariate <sup>a</sup>      | Fast breathing pneumonia <sup>a</sup> | Chest indrawing pneumonia         | Danger sign pneumonia <sup>a</sup> | Hypoxemic pneumonia <sup>a</sup>  | Mortality <sup>a</sup>            | Proportion danger sign pneumonia <sup>a</sup> |
|---------------------------------------|---------------------------------------|-----------------------------------|------------------------------------|-----------------------------------|-----------------------------------|-----------------------------------------------|
|                                       | IRR (95%CI); p-value                  |                                   |                                    |                                   |                                   |                                               |
|                                       | IRR (95%CI); p-value                  | IRR (95%CI); p-value              | IRR (95%CI); p-value               | IRR (95%CI); p-value              | IRR (95%CI); p-value              | OR (95%CI); p-value                           |
| <i>agecat*3dose</i> (B <sub>i</sub> ) |                                       |                                   |                                    |                                   |                                   |                                               |
| 0-5 months                            | 0.882 (0.592, 1.316)<br>p=0.540       | 1.268 (0.813, 1.979)<br>p=0.295   | 0.685 (0.4112, 1.141)<br>p=0.146   | 0.567 (0.363, 0.888)<br>p=0.013   | 0.741 (0.454, 1.211)<br>p=0.232   | 0.655 (0.481, 0.892)<br>p=0.007               |
| 6-23 months                           | 3.689 (2.637, 5.162)<br>p<0.0001      | 2.172 (1.435, 3.289)<br>p<0.0001  | 1.021 (0.630, 1.655)<br>p=0.932    | 0.848 (0.558, 1.290)<br>p=0.442   | 0.920 (0.572, 1.480)<br>p=0.732   | 0.348 (0.260, 0.466)<br>p<0.0001              |
| 24-59 months                          | 2.271 (1.597, 3.228);<br>p<0.0001     | 0.719 (0.446, 1.160);<br>p=0.177  | 0.227 (0.122, 0.420)<br>p<0.0001   | 0.171 (0.097, 0.300);<br>p<0.0001 | 0.233 (0.125, 0.433);<br>p<0.0001 | 0.166 (0.116, 0.235);<br>p<0.0001             |
| <i>L1.dres</i> (B <sub>3</sub> )      | 1.024 (1.007 1.042);<br>p=0.007       | 1.045 (1.030, 1.061);<br>p=0<0001 | 1.064 (1.049, 1.079);<br>p<0.0001  | 1.091 (1.060, 1.124);<br>p<0.0001 | 0.999 (0.902, 1.107);<br>p=0.990  | 1.098 (1.078, 1.119);<br>p<0.0001             |
| constant (B <sub>0</sub> )            | 76.24 (58.47, 99.41);<br>p<0.0001     | 86.56 (63.1, 118.67);<br>p<0.0001 | 83.65 (59.44, 117.71);<br>p<0.0001 | 38.24 (28.55, 51.22);<br>p<0.0001 | 7.43 (5.32, 10.37);<br>p<0.0001   | 0.511 (0.414, 0.630);<br>p<0.0001             |

IRR = Incidence Rate Ratio OR = Odds Ratio

<sup>a</sup> Observations = 87; these are the 30 calendar months in time (January 2012 to June 2014) minus one due to the inclusion of the one-month lagged residual term *L1.dres* multiplied by three for each of the age categories: 0-5 months, 6-23 months, 24-59 months

Figure A8

Age Category as an Effect Modifier: Association of 76% three-dose PCV13 coverage on pneumonia outcomes

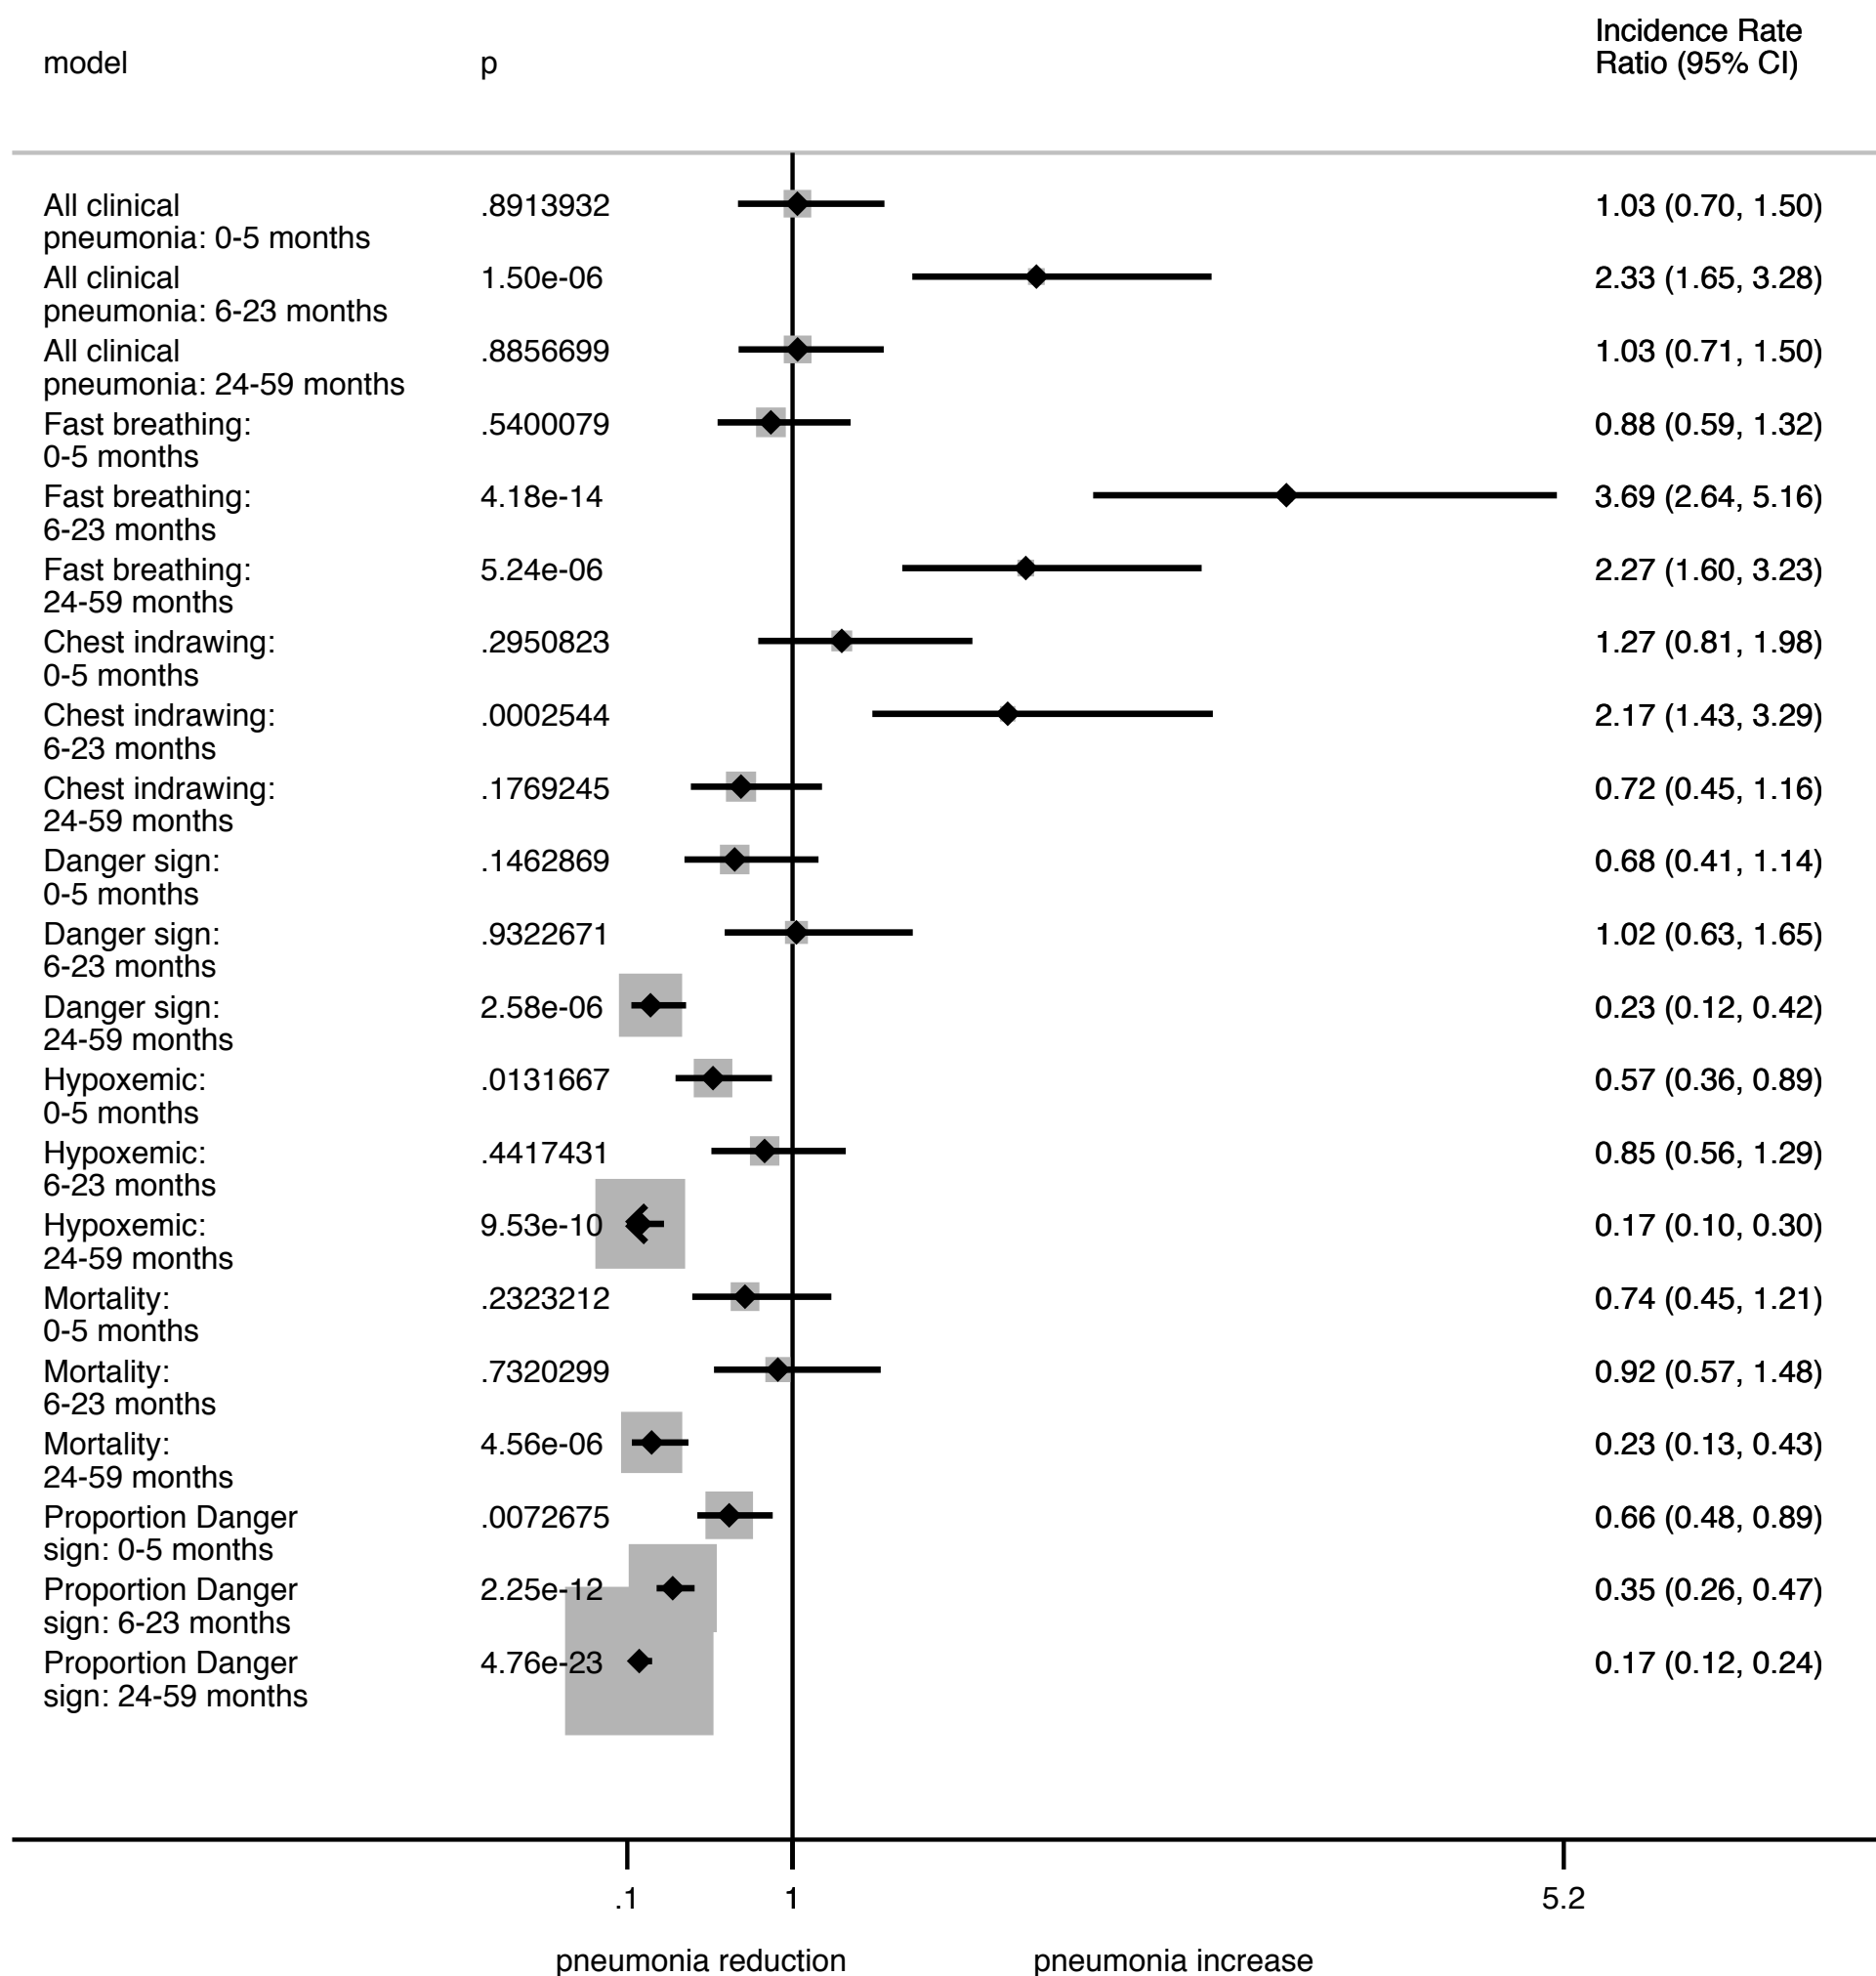

Supplement: pone.0168209.s008.pdf [file pone.0168209.s008.pdf]
