# Supplementary material for: Impact of the 13-Valent Pneumococcal Conjugate Vaccine on Clinical and Hypoxemic Childhood Pneumonia over Three Years in Central Malawi: An Observational Study
Source: PubMed Central journal article supplement (PMC5215454; doi:10.1371/journal.pone.0168209), 2017-01-04
Supplement: pone.0168209.s001.pdf [file pone.0168209.s001.pdf]

**VILLAGE CLINIC PNEUMONIA RECORDING FORM**

PatientID \_\_\_\_\_

**Section A: VILLAGE CLINIC DETAILS**

District: \_\_\_\_\_ Health Facility: \_\_\_\_\_ Village Clinic: \_\_\_\_\_

**Section B: PATIENT IDENTIFICATION DETAILS**

Child's Name: \_\_\_\_\_ Date of birth \_\_\_/\_\_\_/\_\_\_ Sex: Boy/Girl Diagnosis Date: \_\_\_/\_\_\_/\_\_\_

Caregiver's Name: \_\_\_\_\_ Relationship: Mother/Father/Other \_\_\_\_\_

Physical Address: \_\_\_\_\_ Village: \_\_\_\_\_ TA: \_\_\_\_\_

**Section C: VACCINE STATUS**

| Tick (✓) if Yes and Cross (X) if No. For PCV indicate dates of vaccine if yes |                                          |                                |                                |                  |
|-------------------------------------------------------------------------------|------------------------------------------|--------------------------------|--------------------------------|------------------|
| Age                                                                           | Vaccines                                 |                                |                                |                  |
| Birth                                                                         | BCG <input type="checkbox"/>             | OPV-0 <input type="checkbox"/> | PCV VACCINE DATES              |                  |
| 6 weeks*                                                                      | DPT-Hib+ HepB 1 <input type="checkbox"/> | OPV-1 <input type="checkbox"/> | PCV-1 <input type="checkbox"/> | Date ___/___/___ |
| 10 weeks*                                                                     | DPT-Hib+ HepB 2 <input type="checkbox"/> | OPV-2 <input type="checkbox"/> | PCV-2 <input type="checkbox"/> | Date ___/___/___ |
| 14 weeks*                                                                     | DPT-Hib+ HepB 3 <input type="checkbox"/> | OPV-3 <input type="checkbox"/> | PCV-3 <input type="checkbox"/> | Date ___/___/___ |
| 9 months                                                                      | Measles <input type="checkbox"/>         |                                |                                |                  |

**Section D: SIGNS AND SYMPTOMS**

Oxygen Saturation: \_\_\_\_% Respiratory Rate: \_\_\_\_ Heart Rate: \_\_\_\_ MUAC: \_\_\_\_ cm Temperature \_\_\_\_°c

- Cough     Fast breathing     Chest in drawing     Convulsion     Difficult breathing     Not feeding well  
 Palmar Pallor     Very Sleepy or Unconscious     Swelling of both feet     Vomiting everything     Others \_\_\_\_\_

Note: Check all that apply

**Section E: TREATMENT/ PRE-REFERAL TREATMENT**

Refer to health facility

Treat at home

Cotrimoxazole adult tablet- 80/400

Cotrimoxazole adult tablet- 80/400

Age 2 months-12 months- ½ tablet

Age 2 months-12 months- ½ Tablet (total 5 tablets)

Age 12 months-5 years- 1tablet

Age 12 months-5 years- 1tablet (total 10 tablets)

**Section F: FOLLOW-UP FEEDBACK**

Baby Alive     Baby died    Date: \_\_\_/\_\_\_/\_\_\_: at Health Facility/ Home/ Others (Specify): \_\_\_\_\_

Follow up     Feedback done on: \_\_\_/\_\_\_/\_\_\_

Comments: \_\_\_\_\_

Compiled By (HSA Name) \_\_\_\_\_

Date: \_\_\_/\_\_\_/\_\_\_

Verified By (SHSA Name): \_\_\_\_\_

Date: \_\_\_/\_\_\_/\_\_\_

Health Centre:

Today's Date (dd/mm/yyyy):

**PNEUMONIA HEALTH CENTRE RECORDING FORM**

Name: \_\_\_\_\_  
 Address: \_\_\_\_\_ Village: \_\_\_\_\_ TA: \_\_\_\_\_

Age (months): \_\_\_\_\_ Sex (M/F): \_\_\_\_\_

Number of days of signs/symptoms: More than 21 days  Less than 21 days   
 Antibiotic treatment prior to coming to health centre Yes  No  Self Referral  Referral from village clinic

Weight kg \_\_\_\_\_ MUAC cm \_\_\_\_\_

Temperature °C \_\_\_\_\_ Respiratory rate per minute \_\_\_\_\_

Oxygen Saturation \_\_\_\_\_ Heart Rate per minute \_\_\_\_\_

Healthcare provider name: \_\_\_\_\_  
 (tick cadre) CO  MA  HSA  Nurse   
 Healthcare provider signature: \_\_\_\_\_  
 Date (dd/mm/yyyy): \_\_\_\_\_

Previous pneumonia in the last 12 months Yes  No   
 Previous hospital admissions for pneumonia in last 12 months Yes  No   
 BCG: No  Yes   
 PCV: No  Yes  # Doses: \_\_\_\_\_  
 Polio: : No  Yes  # Doses: \_\_\_\_\_  
 DTP-HepB-Hib: No  Yes  # Doses: \_\_\_\_\_  
 measles: No  Yes

| Clinical features                                                                                                                                | Classification                                                                                     | Referral Decision                             | Treatment                                                                                                                                      |
|--------------------------------------------------------------------------------------------------------------------------------------------------|----------------------------------------------------------------------------------------------------|-----------------------------------------------|------------------------------------------------------------------------------------------------------------------------------------------------|
| <b>CHILD 2 MONTHS TO 5 YEARS</b>                                                                                                                 |                                                                                                    |                                               |                                                                                                                                                |
| Chest in-drawing Yes <input type="checkbox"/> No <input type="checkbox"/>                                                                        | Very severe pneumonia <input type="checkbox"/>                                                     | Prepare for referral <input type="checkbox"/> | Benzylpenicillin 50,000 IU/kg/dose <input type="checkbox"/>                                                                                    |
| Grunting Yes <input type="checkbox"/> No <input type="checkbox"/>                                                                                |                                                                                                    |                                               |                                                                                                                                                |
| Nasal flaring Yes <input type="checkbox"/> No <input type="checkbox"/>                                                                           | Severe pneumonia <input type="checkbox"/>                                                          | Prepare for referral <input type="checkbox"/> | Benzylpenicillin 50,000 IU/kg/dose <input type="checkbox"/>                                                                                    |
| Head nodding Yes <input type="checkbox"/> No <input type="checkbox"/>                                                                            |                                                                                                    |                                               |                                                                                                                                                |
| Central cyanosis Yes <input type="checkbox"/> No <input type="checkbox"/>                                                                        | Pneumonia <input type="checkbox"/>                                                                 | Treat at home <input type="checkbox"/>        | Cotrimoxazole 2-12 months (5 tabs) <input type="checkbox"/> <i>or</i><br>Cotrimoxazole 12 months to 5 years (10 tabs) <input type="checkbox"/> |
| Sleepy/difficult to wake Yes <input type="checkbox"/> No <input type="checkbox"/>                                                                |                                                                                                    |                                               |                                                                                                                                                |
| Convulsions Yes <input type="checkbox"/> No <input type="checkbox"/>                                                                             | PCP <input type="checkbox"/>                                                                       | Prepare for referral <input type="checkbox"/> | Benzylpenicillin 50,000 IU/kg/dose <input type="checkbox"/><br><i>and</i><br>Cotrimoxazole ½ tab <input type="checkbox"/>                      |
| Not able to breastfeed Yes <input type="checkbox"/> No <input type="checkbox"/>                                                                  |                                                                                                    |                                               |                                                                                                                                                |
| Not able to drink Yes <input type="checkbox"/> No <input type="checkbox"/>                                                                       | Other (specify) <input type="checkbox"/>                                                           |                                               |                                                                                                                                                |
| Stridor in calm child Yes <input type="checkbox"/> No <input type="checkbox"/>                                                                   |                                                                                                    |                                               |                                                                                                                                                |
| Wheeze Yes <input type="checkbox"/> No <input type="checkbox"/>                                                                                  |                                                                                                    |                                               |                                                                                                                                                |
| <b>YOUNG INFANT &lt; 2 MONTHS</b>                                                                                                                |                                                                                                    |                                               |                                                                                                                                                |
| Chest in-drawing Yes <input type="checkbox"/> No <input type="checkbox"/>                                                                        | Very severe pneumonia <input type="checkbox"/>                                                     | Prepare for referral <input type="checkbox"/> | Benzylpenicillin 50,000 IU/kg/dose <input type="checkbox"/>                                                                                    |
| Grunting Yes <input type="checkbox"/> No <input type="checkbox"/>                                                                                |                                                                                                    |                                               |                                                                                                                                                |
| Nasal flaring Yes <input type="checkbox"/> No <input type="checkbox"/>                                                                           | Severe pneumonia <input type="checkbox"/>                                                          | Prepare for referral <input type="checkbox"/> | Benzylpenicillin 50,000 IU/kg/dose <input type="checkbox"/>                                                                                    |
| Head nodding Yes <input type="checkbox"/> No <input type="checkbox"/>                                                                            |                                                                                                    |                                               |                                                                                                                                                |
| Central cyanosis Yes <input type="checkbox"/> No <input type="checkbox"/>                                                                        | PCP <input type="checkbox"/>                                                                       | Prepare for referral <input type="checkbox"/> | Benzylpenicillin 50,000 IU/kg/dose <input type="checkbox"/><br><i>and</i><br>Cotrimoxazole ¼ tab <input type="checkbox"/>                      |
| Sleepy/difficult to wake Yes <input type="checkbox"/> No <input type="checkbox"/>                                                                |                                                                                                    |                                               |                                                                                                                                                |
| Not feeding well Yes <input type="checkbox"/> No <input type="checkbox"/>                                                                        | Other (specify) <input type="checkbox"/>                                                           |                                               |                                                                                                                                                |
| Wheeze Yes <input type="checkbox"/> No <input type="checkbox"/>                                                                                  |                                                                                                    |                                               |                                                                                                                                                |
| Stridor (calm child) Yes <input type="checkbox"/> No <input type="checkbox"/>                                                                    |                                                                                                    |                                               |                                                                                                                                                |
| Apnoeic spells Yes <input type="checkbox"/> No <input type="checkbox"/>                                                                          |                                                                                                    |                                               |                                                                                                                                                |
| Convulsions Yes <input type="checkbox"/> No <input type="checkbox"/>                                                                             |                                                                                                    |                                               |                                                                                                                                                |
| HIV status Positive <input type="checkbox"/> Negative <input type="checkbox"/> Exposed <input type="checkbox"/> Unknown <input type="checkbox"/> | Measles at this visit or in past 2 months Yes <input type="checkbox"/> No <input type="checkbox"/> |                                               |                                                                                                                                                |
| Blood film (malaria) Positive <input type="checkbox"/> Negative <input type="checkbox"/> Unknown <input type="checkbox"/>                        | Severe malnutrition Yes <input type="checkbox"/> No <input type="checkbox"/>                       |                                               |                                                                                                                                                |

**PNEUMONIA INPATIENT RECORDING FORM**

Name: \_\_\_\_\_

Address: \_\_\_\_\_

Age (months): \_\_\_\_\_ Sex (M/F): \_\_\_\_\_

Number of days of signs/symptoms: More than 21 days  Less than 21 days

Antibiotic treatment prior to coming to hospital: Yes  No  Self referral  Referred by Health Centre

Date of hospital admission: \_\_\_\_\_

Weight kg \_\_\_\_\_ MUAC cm \_\_\_\_\_

Temperature °C \_\_\_\_\_ Respiratory rate x 1 minute \_\_\_\_\_

Oxygen Saturation \_\_\_\_\_ Heart Rate per minute \_\_\_\_\_

Chest Xray Yes  No   
If yes date taken and results: \_\_\_\_\_

Previous pneumonia in the last 12 months Yes  No   
Previous hospital admissions for pneumonia in last 12 months Yes  No

BCG: No  Yes   
PCV: No  Yes  # Doses: \_\_\_\_\_  
Polio: : No  Yes  # Doses: \_\_\_\_\_  
DTP-HepB-Hib: No  Yes  # Doses: \_\_\_\_\_  
MMR: No  Yes

| Clinical features                 |                                                                                                                                       | Classification                                         | Treatment                                |                            |       |       |       |                                           |                                                          |       |       |
|-----------------------------------|---------------------------------------------------------------------------------------------------------------------------------------|--------------------------------------------------------|------------------------------------------|----------------------------|-------|-------|-------|-------------------------------------------|----------------------------------------------------------|-------|-------|
| <b>CHILD 2 MONTHS TO 5 YEARS</b>  |                                                                                                                                       |                                                        | Antibiotic                               | Dose                       | Day 1 | Day 2 | Day 3 | Day 4                                     | Day 5                                                    | Day 6 | Day 7 |
| Chest in-drawing                  | Yes <input type="checkbox"/> No <input type="checkbox"/>                                                                              | Very severe pneumonia <input type="checkbox"/>         | Benzylpenicillin                         |                            |       |       |       |                                           |                                                          |       |       |
| Grunting                          | Yes <input type="checkbox"/> No <input type="checkbox"/>                                                                              | Severe pneumonia <input type="checkbox"/>              | Amoxycillin                              |                            |       |       |       |                                           |                                                          |       |       |
| Nasal flaring                     | Yes <input type="checkbox"/> No <input type="checkbox"/>                                                                              |                                                        | Chloramphenicol                          |                            |       |       |       |                                           |                                                          |       |       |
| Head nodding                      | Yes <input type="checkbox"/> No <input type="checkbox"/>                                                                              | Pneumonia <input type="checkbox"/>                     | Cotrimoxazole                            |                            |       |       |       |                                           |                                                          |       |       |
| Central cyanosis                  | Yes <input type="checkbox"/> No <input type="checkbox"/>                                                                              |                                                        | Other antibiotic (specify)               |                            |       |       |       |                                           |                                                          |       |       |
| Sleepy/difficult to wake          | Yes <input type="checkbox"/> No <input type="checkbox"/>                                                                              | PCP <input type="checkbox"/>                           | Other treatment                          | Oxygen                     |       |       |       |                                           |                                                          |       |       |
| Convulsions                       | Yes <input type="checkbox"/> No <input type="checkbox"/>                                                                              | Other (specify) <input type="checkbox"/>               |                                          |                            |       |       |       |                                           |                                                          |       |       |
| Not able to breastfeed            | Yes <input type="checkbox"/> No <input type="checkbox"/>                                                                              |                                                        |                                          |                            |       |       |       |                                           |                                                          |       |       |
| Not able to drink                 | Yes <input type="checkbox"/> No <input type="checkbox"/>                                                                              |                                                        |                                          |                            |       |       |       |                                           |                                                          |       |       |
| Stridor in calm child             | Yes <input type="checkbox"/> No <input type="checkbox"/>                                                                              |                                                        |                                          |                            |       |       |       |                                           |                                                          |       |       |
| Wheeze                            | Yes <input type="checkbox"/> No <input type="checkbox"/>                                                                              |                                                        |                                          |                            |       |       |       |                                           |                                                          |       |       |
| <b>YOUNG INFANT &lt; 2 MONTHS</b> |                                                                                                                                       |                                                        | Antibiotics                              | Dose                       | Day 1 | Day 2 | Day 3 | Day 4                                     | Day 5                                                    | Day 6 | Day 7 |
| Chest in-drawing                  | Yes <input type="checkbox"/> No <input type="checkbox"/>                                                                              | Very severe pneumonia/disease <input type="checkbox"/> | Gentamicin                               |                            |       |       |       |                                           |                                                          |       |       |
| Grunting                          | Yes <input type="checkbox"/> No <input type="checkbox"/>                                                                              | Severe pneumonia <input type="checkbox"/>              |                                          |                            |       |       |       |                                           |                                                          |       |       |
| Nasal flaring                     | Yes <input type="checkbox"/> No <input type="checkbox"/>                                                                              |                                                        | Benzylpenicillin                         |                            |       |       |       |                                           |                                                          |       |       |
| Head nodding                      | Yes <input type="checkbox"/> No <input type="checkbox"/>                                                                              | PCP <input type="checkbox"/>                           | Amoxycillin                              |                            |       |       |       |                                           |                                                          |       |       |
| Central cyanosis                  | Yes <input type="checkbox"/> No <input type="checkbox"/>                                                                              |                                                        | Other (specify) <input type="checkbox"/> | Other antibiotic (specify) |       |       |       |                                           |                                                          |       |       |
| Sleepy/difficult to wake          | Yes <input type="checkbox"/> No <input type="checkbox"/>                                                                              |                                                        | Other treatment                          | Oxygen                     |       |       |       |                                           |                                                          |       |       |
| Not feeding well                  | Yes <input type="checkbox"/> No <input type="checkbox"/>                                                                              |                                                        |                                          |                            |       |       |       |                                           |                                                          |       |       |
| Wheeze                            | Yes <input type="checkbox"/> No <input type="checkbox"/>                                                                              |                                                        |                                          |                            |       |       |       |                                           |                                                          |       |       |
| Stridor (calm child)              | Yes <input type="checkbox"/> No <input type="checkbox"/>                                                                              |                                                        |                                          |                            |       |       |       |                                           |                                                          |       |       |
| Apnoeic spells                    | Yes <input type="checkbox"/> No <input type="checkbox"/>                                                                              |                                                        |                                          |                            |       |       |       |                                           |                                                          |       |       |
| Convulsions                       | Yes <input type="checkbox"/> No <input type="checkbox"/>                                                                              |                                                        |                                          |                            |       |       |       |                                           |                                                          |       |       |
| HIV status                        | Positive <input type="checkbox"/> Negative <input type="checkbox"/> Exposed <input type="checkbox"/> Unknown <input type="checkbox"/> |                                                        |                                          |                            |       |       |       |                                           |                                                          |       |       |
| Blood film (malaria)              | Positive <input type="checkbox"/> Negative <input type="checkbox"/> Unknown <input type="checkbox"/>                                  |                                                        |                                          |                            |       |       |       |                                           |                                                          |       |       |
|                                   |                                                                                                                                       |                                                        |                                          |                            |       |       |       | Measles at this visit or in past 2 months | Yes <input type="checkbox"/> No <input type="checkbox"/> |       |       |
|                                   |                                                                                                                                       |                                                        |                                          |                            |       |       |       | Severe malnutrition * (see below)         | Yes <input type="checkbox"/> No <input type="checkbox"/> |       |       |

• Severe malnutrition is visible severe wasting or oedema in both feet

**please turn over**

## Hospitalisation

|                                                   |                           |
|---------------------------------------------------|---------------------------|
| Duration of hospitalisation in either _____ Hours | _____ Days                |
| Admission diagnosis _____                         | Discharge diagnosis _____ |

## Discharge and Follow-up

|                                                                 |                              |                             |                                    |                              |                             |
|-----------------------------------------------------------------|------------------------------|-----------------------------|------------------------------------|------------------------------|-----------------------------|
| Course of antibiotics to be completed at home                   | Yes <input type="checkbox"/> | No <input type="checkbox"/> | Child returned for follow-up visit | Yes <input type="checkbox"/> | No <input type="checkbox"/> |
| Mother informed to return with child once antibiotics completed | Yes <input type="checkbox"/> | No <input type="checkbox"/> | Course of antibiotic completed**   | Yes <input type="checkbox"/> | No <input type="checkbox"/> |
|                                                                 |                              |                             | Child fully recovered**            | Yes <input type="checkbox"/> | No <input type="checkbox"/> |

## Treatment Results

|                                   |                          |                                  |                          |                                    |                          |
|-----------------------------------|--------------------------|----------------------------------|--------------------------|------------------------------------|--------------------------|
| Treatment completed(1)            | <input type="checkbox"/> | Failure at 48 hrs (2)            | <input type="checkbox"/> | Failure at Day 5                   | <input type="checkbox"/> |
| Left against advise(3)            | <input type="checkbox"/> | Transferred (4)                  | <input type="checkbox"/> | Outcome unknown (5)                | <input type="checkbox"/> |
| Died within 24 hours of admission | <input type="checkbox"/> | Died after 24 hours of admission | <input type="checkbox"/> | <b>(See below for definitions)</b> |                          |

### Additional Remarks:

---



---

## Rationale for Information/Recording System

When the decision is reached that the child has pneumonia and requires hospitalisation then the ***“Pneumonia Inpatient Recording Form”*** must be completed in addition to other forms that may be used, such as critical care pathways. The use of this form is a prerequisite of the Project providing the drugs for treatment of such cases. The form is initiated when the patient is started on treatment and is completed on discharge. The form is provided to assist the health worker in providing good quality care for the patient. All information is transferred to the ***Pneumonia Inpatient Register***.

\* If NO then tick Outcome Unknown (5) in Treatment Results section

\*\* If YES then child can be registered as Treatment Completed(1) in Treatment Results section

1. Course of antibiotics completed and child fully recovered
2. Treatment failure means: Worsening of fast breathing, or Worsening of chest in-drawing, or Development/persistence of abnormal sleepiness or difficulty in awakening, or development/persistence of inability to drink or poor breastfeeding.
3. Child removed from the hospital against medical advise before treatment is completed
4. Child is referred for treatment to another health facility and the result of treatment is unknown; where the result is known, that result should be recorded in place of the result "transferred"
5. When mother does not return with child for follow-up visit once course of antibiotic(s) is finished
