# Supplementary material for: Impact of the 13-Valent Pneumococcal Conjugate Vaccine on Clinical and Hypoxemic Childhood Pneumonia over Three Years in Central Malawi: An Observational Study
Source: PubMed Central journal article supplement (PMC5215454; doi:10.1371/journal.pone.0168209), 2017-01-04
Supplement: pone.0168209.s004.pdf [file pone.0168209.s004.pdf]

## Appendix 4 Clinical pneumonia, hypoxemic pneumonia, outcome, and PCV13 status by age and health system level

Table A4: Clinical pneumonia, hypoxemic pneumonia, outcome, and PCV13 status by age and health system level in Lilongwe and Mchinji districts, Malawi

| Age range    | Health system level   | Clinical pneumonia <sup>1</sup> |                 |                |            | Hypoxemic pneumonia       |                        | Outcome      |            | PCV13         |              |              |              |              |
|--------------|-----------------------|---------------------------------|-----------------|----------------|------------|---------------------------|------------------------|--------------|------------|---------------|--------------|--------------|--------------|--------------|
|              |                       | Fast breathing only             | Chest indrawing | Danger sign(s) | Missing    | SpO <sub>2</sub> Measured | SpO <sub>2</sub> <90 % | Alive        | Died       | Recorded      | 0 doses      | 1 dose       | 2 doses      | 3 doses      |
| 0-5 months   | All, n=7934           | 2015 (25.4%)                    | 3276 (41.3%)    | 2182 (27.5%)   | 461 (5.8%) | 7220 (91.2%)              | 826 (11.4%)            |              |            | 6509 (82.0%)  | 1857 (28.5%) | 1800 (27.7%) | 1411 (21.7%) | 1441 (22.1%) |
|              | Hospital, n=5104      | 251 (4.9%)                      | 2832 (55.5%)    | 1996 (39.1%)   | 251 (4.9%) | 4821 (90.5%)              | 606 (12.6%)            | 5135 (96.3%) | 195 (3.7%) | 4222 (82.7%)  | 1446 (34.2%) | 1130 (26.8%) | 839 (19.9%)  | 807 (19.1%)  |
|              | Health Centre, n=1534 | 823 (53.7%)                     | 381 (24.8%)     | 186 (12.1%)    | 144 (9.4%) | 1397 (91.1%)              | 193 (13.8%)            |              |            | 1376 (89.7%)  | 1061 (77.1%) | 428 (31.1%)  | 316 (23.0%)  | 317 (23.0%)  |
|              | CHW, n=1070           | 941 (87.9%)                     | 63 (5.9%)       | 0 (0.0%)       | 66 (6.2%)  | 1002 (94.9%)              | 27 (2.7%)              |              |            | 911 (85.1%)   | 815 (89.5%)  | 242 (26.6%)  | 256 (28.1%)  | 317 (34.8%)  |
| 6-23 months  | All, n=15272          | 6614 (43.3%)                    | 5197 (34.0%)    | 2948 (19.3%)   | 513 (3.4%) | 13584 (88.1%)             | 1142 (8.4%)            |              |            | 11948 (78.2%) | 1710 (14.3%) | 608 (5.1%)   | 1063 (8.9%)  | 8567 (71.7%) |
|              | Hospital, n=8222      | 543 (6.6%)                      | 4660 (56.7%)    | 2651 (32.2%)   | 368 (4.5%) | 6827 (83.0%)              | 777 (11.4%)            | 7973 (97.0%) | 249 (3.0%) | 5662 (68.9%)  | 956 (16.9%)  | 305 (5.4%)   | 446 (7.9%)   | 3955 (69.9%) |
|              | Health Centre, n=3718 | 2756 (74.1%)                    | 534 (14.4%)     | 283 (7.6%)     | 145 (3.9%) | 3481 (93.6%)              | 324 (9.3%)             |              |            | 3259 (87.7%)  | 370 (11.4%)  | 181 (5.6%)   | 358 (11.0%)  | 2350 (72.1%) |
|              | CHW, n=3332           | 3315 (99.5%)                    | 3 (0.1%)        | 14 (0.4%)      | 0 (0.0%)   | 3276 (94.4%)              | 41 (1.3%)              |              |            | 3027 (90.8%)  | 384 (12.7%)  | 122 (4.0%)   | 259 (8.6%)   | 2262 (74.7%) |
| 24-59 months | All, n=7424           | 4442 (59.8%)                    | 1933 (26.0%)    | 832 (11.2%)    | 217 (2.9%) | 6782 (89.7%)              | 321 (4.7%)             |              |            | 4266 (57.5%)  | 2729 (64.0%) | 104 (2.4%)   | 97 (2.3%)    | 1336 (31.3%) |
|              | Hospital, n=2923      | 255 (8.7%)                      | 1762 (60.3%)    | 750 (25.7%)    | 156 (5.3%) | 2385 (81.6%)              | 198 (8.3%)             | 2838 (97.1%) | 85 (2.9%)  | 1413 (48.3%)  | 902 (63.8%)  | 34 (2.4%)    | 39 (2.8%)    | 438 (31.0%)  |
|              | Health Centre, n=1512 | 1207 (79.8%)                    | 167 (11.1%)     | 77 (5.1%)      | 61 (4.0%)  | 1434 (94.8%)              | 105 (7.3%)             |              |            | 1145 (75.7%)  | 626 (54.7%)  | 31 (2.7%)    | 28 (2.4%)    | 460 (40.2%)  |
|              | CHW, n=2989           | 2980 (99.7%)                    | 4 (0.1%)        | 5 (0.2%)       | 0 (0.0%)   | 2963 (94.8%)              | 18 (0.6%)              |              |            | 1708 (57.4%)  | 1201 (70.3%) | 39 (2.3%)    | 30 (1.8%)    | 438 (25.6%)  |

SpO<sub>2</sub> indicates peripheral oxygen saturation; CHW, community health worker.

<sup>1</sup>See Panel in main paper for pneumonia definitions
