# Supplementary material for: Impact of the 13-Valent Pneumococcal Conjugate Vaccine on Clinical and Hypoxemic Childhood Pneumonia over Three Years in Central Malawi: An Observational Study
Source: PubMed Central journal article supplement (PMC5215454; doi:10.1371/journal.pone.0168209), 2017-01-04

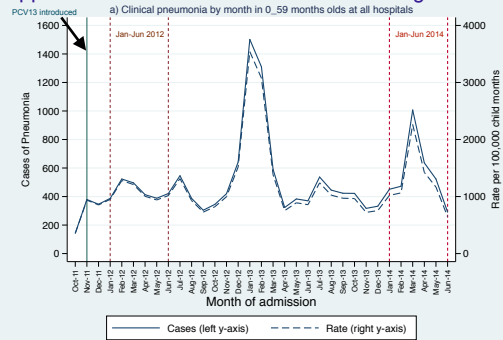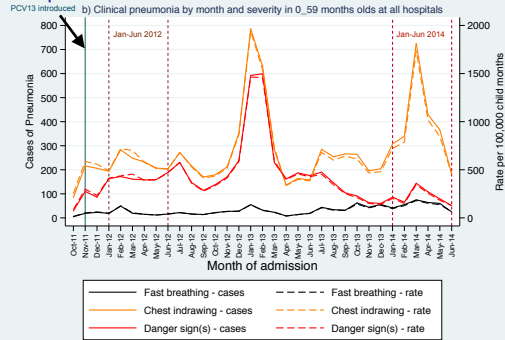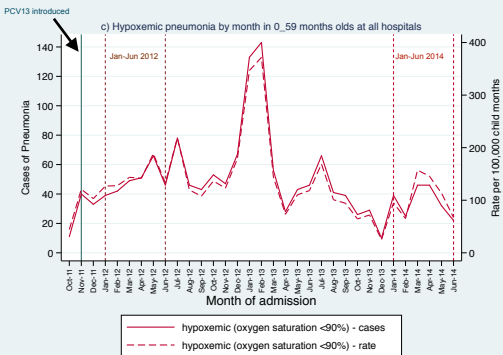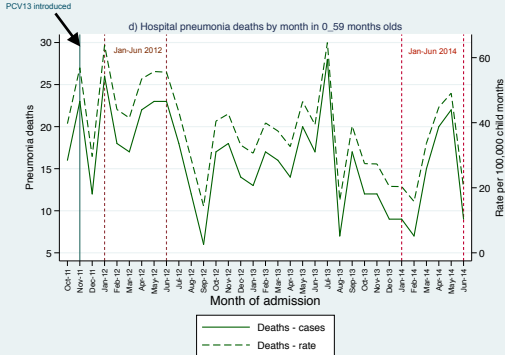

# Appendix 5

# Figure A5.2 Health Centre Trends

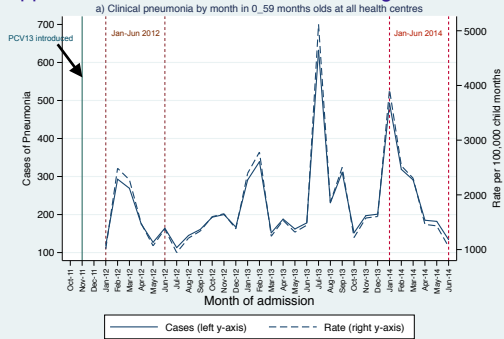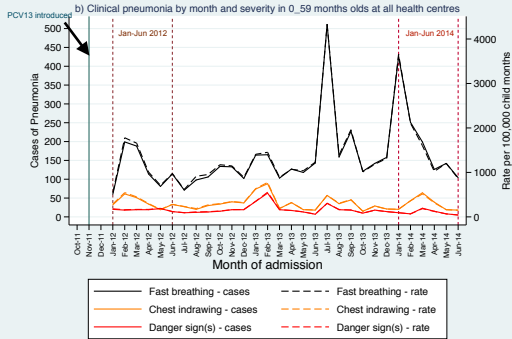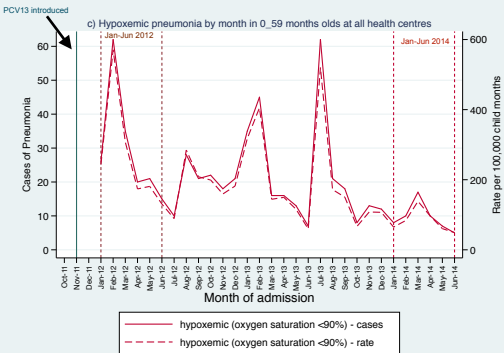

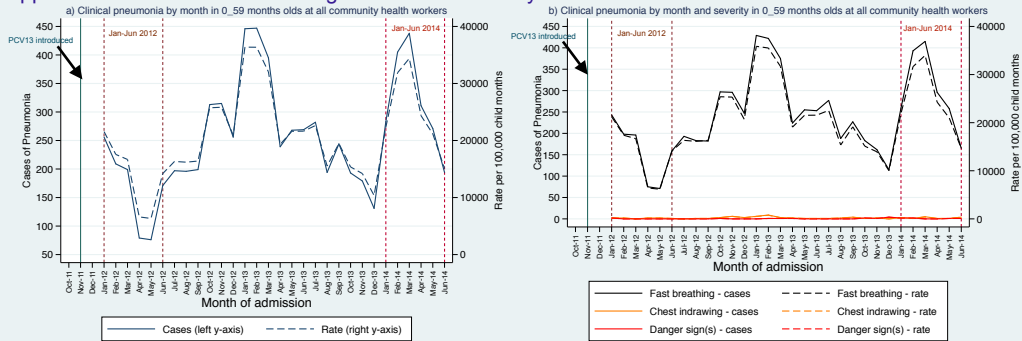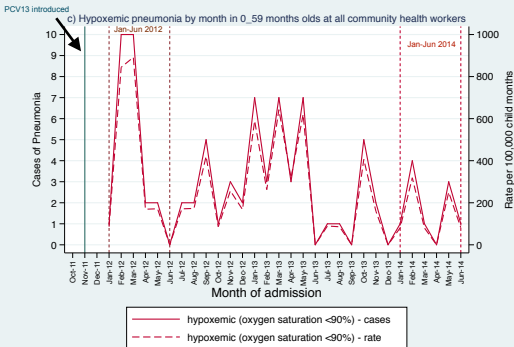

Supplement: pone.0168209.s005.pdf [file pone.0168209.s005.pdf]
